# Supplementary material for: Maternal dominance contributes to subgenome differentiation in allopolyploid fishes
Source: PubMed Central journal article supplement (PMC10724154; doi:10.1038/s41467-023-43740-y), 2023-12-15
Supplement: 41467_2023_43740_MOESM1_ESM.pdf [file 41467_2023_43740_MOESM1_ESM.pdf]

Supplementary information for  
Maternal dominance contributes to subgenome  
differentiation in allopolyploid fishes

## Supplementary Figures 1-50

- Supplementary Fig. 1.** The estimation of genome size of 21 cyprinid fishes based on a genomic distribution of 17-mer frequencies.
- Supplementary Fig. 2.** Evidence for the allotetraploid origin of *S. sinensis*. **a.** Intensity signal heat map of the high-throughput chromatin conformation capture (Hi-C) chromosome interaction. **b.** Syntenic relationships between *O. macrolepis* and *S. sinensis* subP and subM. The green band showed one example of a collinearity gene between homologous chromosomes. **c.** Heatmap and clustering of differential k-mers. The x-axis, differential k-mers; y-axis, chromosomes. The vertical color bar, each chromosome is assigned to subP and subM; the horizontal color bar, each k-mer is specific to subP and subM. **d.** TE frequency on chromosomes showing subP and subM biased distributions in the tetraploid genome of *S. sinensis*.
- Supplementary Fig. 3.** Evidence for the allotetraploid origin of *P. rabaudi*. Evidence for the allotetraploid origin of *P. rabaudi*. **a.** Intensity signal heat map of the high-throughput chromatin conformation capture (Hi-C) chromosome interaction. **b.** Syntenic relationships between *O. macrolepis* and *P. rabaudi* subP and subM. The green band showed one example of a collinearity gene between homologous chromosomes. **c.** Heatmap and clustering of differential k-mers. The x-axis, differential k-mers; y-axis, chromosomes. The vertical color bar, each chromosome is assigned to subP and subM; the horizontal color bar, each k-mer is specific to subP and subM. **d.** TE frequency on chromosomes showing subP and subM biased distributions in the tetraploid genome of *P. rabaudi*.
- Supplementary Fig. 4.** Heatmap of intensity signals of per chromosome Hi-C interactions in allotetraploid *L. capito*.
- Supplementary Fig. 5.** Heatmap of intensity signals of per chromosome Hi-C interactions in allotetraploid *P. rabaudi*.
- Supplementary Fig. 6.** Heatmap of intensity signals of per chromosome Hi-C interactions in allotetraploid *S. sinensis*.
- Supplementary Fig. 7.** The correlated relationship between genome size and TEs in 21 cyprinids using the spearman method. TE content in subP and subM of *P. rabaudi*, *L. capito* and *S. sinensis* were shown using green, blue and red solid circle, respectively.
- Supplementary Fig. 8.** Summary of TE age across species. Heatmap depicts the median age (across all insertions) of given TE classes (DNA, LTR, SINE, LINE, RC, and others) and TE superfamilies.
- Supplementary Fig. 9.** Putative homeobox genes identified in the assembly of *P. rabaudi*, *S. sinensis* and *L. capito*.
- Supplementary Fig. 10.** Principal component analysis (PCA) of differential k-mers in *L. capito*, *P. rabaudi*, and *S. sinensis*, respectively. Points indicate

chromosomes.

- Supplementary Fig. 11.** The distribution of subgenome-biased index (SBI) for TEs in the reference genome of three allotetraploids.
- Supplementary Fig. 12.** Divergence times within the Cyprinidae family and between subgenomes of five allotetraploids inferred by MCMCTree. Species tree constructed using IQ-TREE based on CDS of 300 one-to-one orthologues. *Triplophysa bleekeri* was used as the outgroup. See Supplementary Fig. 13.
- Supplementary Fig. 13.** A Maximum Likelihood (ML) phylogenetic tree of the Cyprinidae family on the basis of CDS of 300 one-to-one orthologues using IQ-TREE. *T. bleekeri* was used as the outgroup. Bootstrap values supporting on each node are calculated with 1000 replicates.
- Supplementary Fig. 14.** A Maximum Likelihood (ML) phylogenetic tree of the Cyprinidae family on the basis of CDS of 310 one-to-one orthologues using RAxML. Zebrafish and *Danionella translucida* were used as the outgroup.
- Supplementary Fig. 15.** A phylogeny of the Cyprinidae family based on mitochondria genomes. We used mitochondrial genomes of 37 species to infer this phylogeny by RAxML using *T. bleekeri* as the outgroup. Bootstrap values lower than 60 were not shown.
- Supplementary Fig. 16.** A ML tree made from the whole genome alignment (WGA). The WGA of 13 cyprinid fishes was used for building the ML phylogenetic tree by RAxML. Numbers on the nodes represent the support values from 200 bootstrap tests. We used *Distoechodon tumirostris* as the outgroup.
- Supplementary Fig. 17.** A ML phylogenetic tree generated from 4d sites. 252,437 4d sites of 1,669 single-copy orthologs from 13 cyprinid fishes were identified and used for constructing a ML tree by RAxML. Numbers on the nodes represent the support values from 200 bootstrap tests. *D. tumirostris* was used as the outgroup.
- Supplementary Fig. 18.** **a** Summary tree across 1665 genetrees, inferred by SumTrees. Values represent the degree of support for clades indicated as proportions (posterior probabilities). **b** DensiTree of 1665 genetrees, constructed using MUSCLE and RaxML-NG; green: consensus trees across multiple gene trees; blue: summary tree.
- Supplementary Fig. 19.** Congruences between concatenation-based tree (left) and summary tree across 1665 genetrees (right).
- Supplementary Fig. 20.** Examples of expression of sub-F (left) and neo-F (right) genes. Gray bar, *Sc. acanthopterus* or *O. macrolepis*; blue bar, subP of each allotetraploid; red bar, subM of each allotetraploid. Tissues related with sub-F or neo-F were showed using asterisks.
- Supplementary Fig. 21.** Subgenome fractionation of *L. capito* chromosomes relative to the diploid *Danio rerio*. Gene retention in *L. capito* subP (red) and subM

(blue) was calculated in 100 gene sliding windows for each chromosome of the *D. rerio* reference.

**Supplementary Fig. 22.** Subgenome fractionation of *P. rabaudi* chromosomes relative to the diploid *D. rerio*. Gene retention in *P. rabaudi* subP (red) and subM (blue) was calculated in 100 gene sliding windows for each chromosome of the *D. rerio* reference.

**Supplementary Fig. 23.** Subgenome fractionation of *S. sinensis* chromosomes relative to the diploid *D. rerio*. Gene retention in *S. sinensis* subP (red) and subM (blue) was calculated in 100 gene sliding windows for each chromosome of the *D. rerio* reference.

**Supplementary Fig. 24.** Subgenome fractionation of *L. capito* chromosomes relative to the diploid *O. macrolepis*. Gene retention in *L. capito* subP (red) and subM (blue) was calculated in 100 gene sliding windows for each chromosome of the *O. macrolepis* reference.

**Supplementary Fig. 25.** Subgenome fractionation of *P. rabaudi* chromosomes relative to the diploid *O. macrolepis*. Gene retention in *P. rabaudi* subP (red) and subM (blue) was calculated in 100 gene sliding windows for each chromosome of the *O. macrolepis* reference.

**Supplementary Fig. 26.** Subgenome fractionation of *S. sinensis* chromosomes relative to the diploid *O. macrolepis*. Gene retention in *S. sinensis* subP (red) and subM (blue) was calculated in 100 gene sliding windows for each chromosome of the *O. macrolepis* reference.

**Supplementary Fig. 27.** Subgenome fractionation of *L. capito* chromosomes relative to the diploid *Sc. acanthopterus*. Gene retention in *L. capito* subP (red) and subM (blue) was calculated in 100 gene sliding windows for each chromosome of the *Sc. acanthopterus* reference.

**Supplementary Fig. 28.** Subgenome fractionation of *P. rabaudi* chromosomes relative to the diploid *Sc. acanthopterus*. Gene retention in *P. rabaudi* subP (red) and subM (blue) was calculated in 100 gene sliding windows for each chromosome of the *Sc. acanthopterus* reference.

**Supplementary Fig. 29.** Subgenome fractionation of *Sc. sinensis* chromosomes relative to the diploid *Sc. acanthopterus*. Gene retention in *S. sinensis* subP (red) and subM (blue) was calculated in 100 gene sliding windows for each chromosome of the *Sc. acanthopterus* reference.

**Supplementary Fig. 30.** Biased distribution of complete and single copy genes generated by the BUSCO analysis in the subM of five allotetraploids ( $X^2$  test;  $p\text{-value} \leq 5.35e-6$ ).

**Supplementary Fig. 31.** GO enrichment analysis of the complete and single copy BUSCO genes in the subP of *S. sinensis*.

**Supplementary Fig. 32.** GO enrichment analysis of the complete and single copy BUSCO genes in the subM of *S. sinensis*.

**Supplementary Fig. 33.** GO enrichment analysis of the complete and single copy BUSCO genes in the subP of *P. rabaudi*.

**Supplementary Fig. 34.** GO enrichment analysis of the complete and single copy BUSCO



genes in the subM of *P. rabaudi*.

**Supplementary Fig. 35.** GO enrichment analysis of the complete and single copy BUSCO genes in the subP of *L. capito*.

**Supplementary Fig. 36.** GO enrichment analysis of the complete and single copy BUSCO genes in the subM of *L. capito*.

**Supplementary Fig. 37.** Pan-gene analysis. **a** Frequency of orthogroups. The pie chart shows the proportion of core (shared by all 36 samples), softcore (shared by > 90% samples but not all), dispensable (shared by more than one but  $\leq$  90% samples), and private genes (present in only one sample) in those genomes. **b** Number of core genes that exists only in subP and subM of allopolyploids. There tends to be a statistically significant number of core genes biased distribution toward the subM in all species except *P. rabaudi* ( $X^2$  test;  $p\text{-value} \leq 4.6e-4$ ).

**Supplementary Fig. 38.** Median TPM of genes from three to five replicates of RNAseq across six tissue types in *S. sinensis*, *L. capito*, and *P. rabaudi*. Median TPM values displayed are separated by subP (red) and subM (blue) with the average across all three to five replicates for each subgenome/tissue indicated by horizontal black bars.

**Supplementary Fig. 39.** Expression of homoeolog pairs plotted as subP biased synteologs (red), subM biased synteologs (blue) and unbiased synteologs (grey) was shown in five tissues.

**Supplementary Fig. 40.** Histograms of differences in TE density values downstream of subP and subM synteologs of *S. sinensis*, *L. capito*, and *P. rabaudi*. The density values were calculated for all TEs in a 10,000 bp window downstream of genes and difference values were calculated by subtracting TE density of subM synteologs from subP synteologs. Negative values represent higher TE density for synteologs in the subM, whereas positive values reflect higher TE density for the subP synteologs.

**Supplementary Fig. 41.** Boxplots of TE density values for genes exhibiting biased expression in subP (left column) and subM (right column). TE density of synteologs in subP (red) and subM (blue) for *S. sinensis*, *L. capito*, and *P. rabaudi* were plotted for 10,000 bp windows upstream of gene start sites. Two-sample t-test results are shown as non-significant (ns),  $p < 0.005$  (\*\*), and  $p < 0.00005$  (\*\*\*\*).

**Supplementary Fig. 42.** Boxplots of TE density values for genes exhibiting biased expression in subP (left column) and subM (right column). TE density of synteologs in subP (red) and subM (blue) for *S. sinensis*, *L. capito*, and *P. rabaudi* were plotted for 10,000 bp windows downstream of gene start sites. Two-sample t-test results are shown as non-significant (ns) and  $p < 0.00005$  (\*\*\*\*).

**Supplementary Fig. 43.** Methylation levels at the CH sites of two diploid ancestors *O. macrolepis* and *Sc. acanthopterus* and three allotetraploids *S. sinensis*, *L. capito*, and *P. rabaudi*. The x axis represented the gene

body (TSS = transcription start site and TTS = transcription termination site) and 2 kb upstream and downstream region. The y axis showed the weighted CH methylation level.

**Supplementary Fig. 44.** CG methylation pattern of two diploid ancestors *O. macrolepis* and *Sc. acanthopterus* and three allotetraploids *S. sinensis*, *L. capito*, and *P. rabaudi*. The x axis showed the gene body (TSS and TTS) and 2 kb upstream and downstream region. The y axis was the weighted CG methylation level.

**Supplementary Fig. 45.** CG methylation pattern of 7040 genes with a 1:1:2:2:2 relationship (1 *O. macrolepis* gene, 1 *Sc. acanthopterus* gene, 2 *S. sinensis* genes, 2 *L. capito* genes and 2 *P. rabaudi* genes). The x and y axis represented the gene body (TSS and TTS) and 2 kb upstream and downstream region and weighted CG methylation level, respectively.

**Supplementary Fig. 46.** CG methylation levels of subP (a) or subM (b) biased expression genes in the muscle tissue of *L. capito*, *P. rabaudi* and *S. sinensis*. The x axis was the gene body and 2 kb upstream and downstream region. The y axis indicated the weighted CG methylation level.

**Supplementary Fig. 47.** Comparison of TE mCG levels between subP (red) and subM (green). CG methylation of TEs that are in 1kb vicinity of 7040 positionally conserved syntenic ohnologs (a) and at the whole genome level (b). The x axis was the TE and 2 kb upstream and downstream region. The y axis indicated the weighted CG methylation level of TEs.

**Supplementary Fig. 48.** Global A/B compartments identified in the *L. capito* genome using the PCA-based method.

**Supplementary Fig. 49.** Global A/B compartments found in the *P. rabaudi* genome using the PCA-based method.

**Supplementary Fig. 50.** Global A/B compartments obtained from the *S. sinensis* genome using the PCA-based method.

## Supplementary Tables 1-24

**Supplementary Table 1.** Detail information of sequenced species in this study.

**Supplementary Table 2.** Summary of sequencing data for assembly of the genomes.

**Supplementary Table 3.** Summary of genome assemblies of twenty-one species.

**Supplementary Table 4.** Estimation of the genome size using 17-mer distribution analysis.

**Supplementary Table 5.** BUSCO evaluation of the completeness and accuracy of the genomes.

**Supplementary Table 6.** Statistics of Hi-C mapping of the *S. sinensis* genome.

**Supplementary Table 7.** Statistics of Hi-C mapping of the *L. capito* genome.

**Supplementary Table 8.** Statistics of Hi-C mapping of the *P. rabaudi* genome.

**Supplementary Table 9.** Statistical data of 50 chromosomes of *S. sinensis*.

**Supplementary Table 10.** Statistical data of 50 chromosomes of *P. rabaudi*.

**Supplementary Table 11.** Statistical data of 50 chromosomes of *L. capito*.

**Supplementary Table 12.** BUSCO evaluation of gene completeness from the assembly

genomes.

**Supplementary Table 13.** Characteristics of transposable element identified in the assembled genomes.

**Supplementary Table 14.** Transposable elements that are subgenome biased in the three allotetraploids.

**Supplementary Table 15.** Number of ohnolog clusters in evolutionary fate categories.

**Supplementary Table 16.** Total subgenome percent gene retention values for each subgenome of three focal tetraploid species when aligned to three diploid references.

**Supplementary Table 17.** Detail information of tandem repeat genes of *S. sinensis*, *L. capito* and *P. rabaudi*.

**Supplementary Table 18.** Chi-squared test (two-sided) results for biased genes in each of six tissue types.

**Supplementary Table 19.** Chi-squared test (two-sided) results for biased genes in six tissue types which are retained in a 1:1:2:2:2 ratio across subgenomes and the three focal allotetraploids.

**Supplementary Table 20.** Constraint on CNSs located on the subP and subM of each species relative to a model that incorporates mean CNS conservation across all subgenomes and subgenome-specific phylogenetic distance from *O. macrolepis*.

**Supplementary Table 21.** Non-clonal read pair alignment rate and non-conversion rate of the two diploid and three tetraploid fish species.

**Supplementary Table 22.** TAD and conserved TAD identified by hicFINDTAD and HiTAD.

**Supplementary Table 23.** Change in size of TADs found in subgenomes of three allotetraploids.

**Supplementary Table 24.** Mitochondrial and assembly genomes of reported species used in this study.

**Supplementary Data 1-6 provided as separate Excel files**

**Supplementary Data 1.** Evaluation of the accuracy of the assembled genomes using Illumina pair-end reads.

**Supplementary Data 2.** Characteristics of genes identified in the assembled genomes.

**Supplementary Data 3.** Detail information of TEs identified in the assembled genomes.

**Supplementary Data 4.** Hox genes identified in subgenomes of three allotetraploids.

**Supplementary Data 5.** Occupied genome length, gene number and TE sequences in A/B compartment in subgenomes of three allotetraploids.

**Supplementary Data 6.** Tissues of studied species used for RNA-Seq and Iso-Seq.

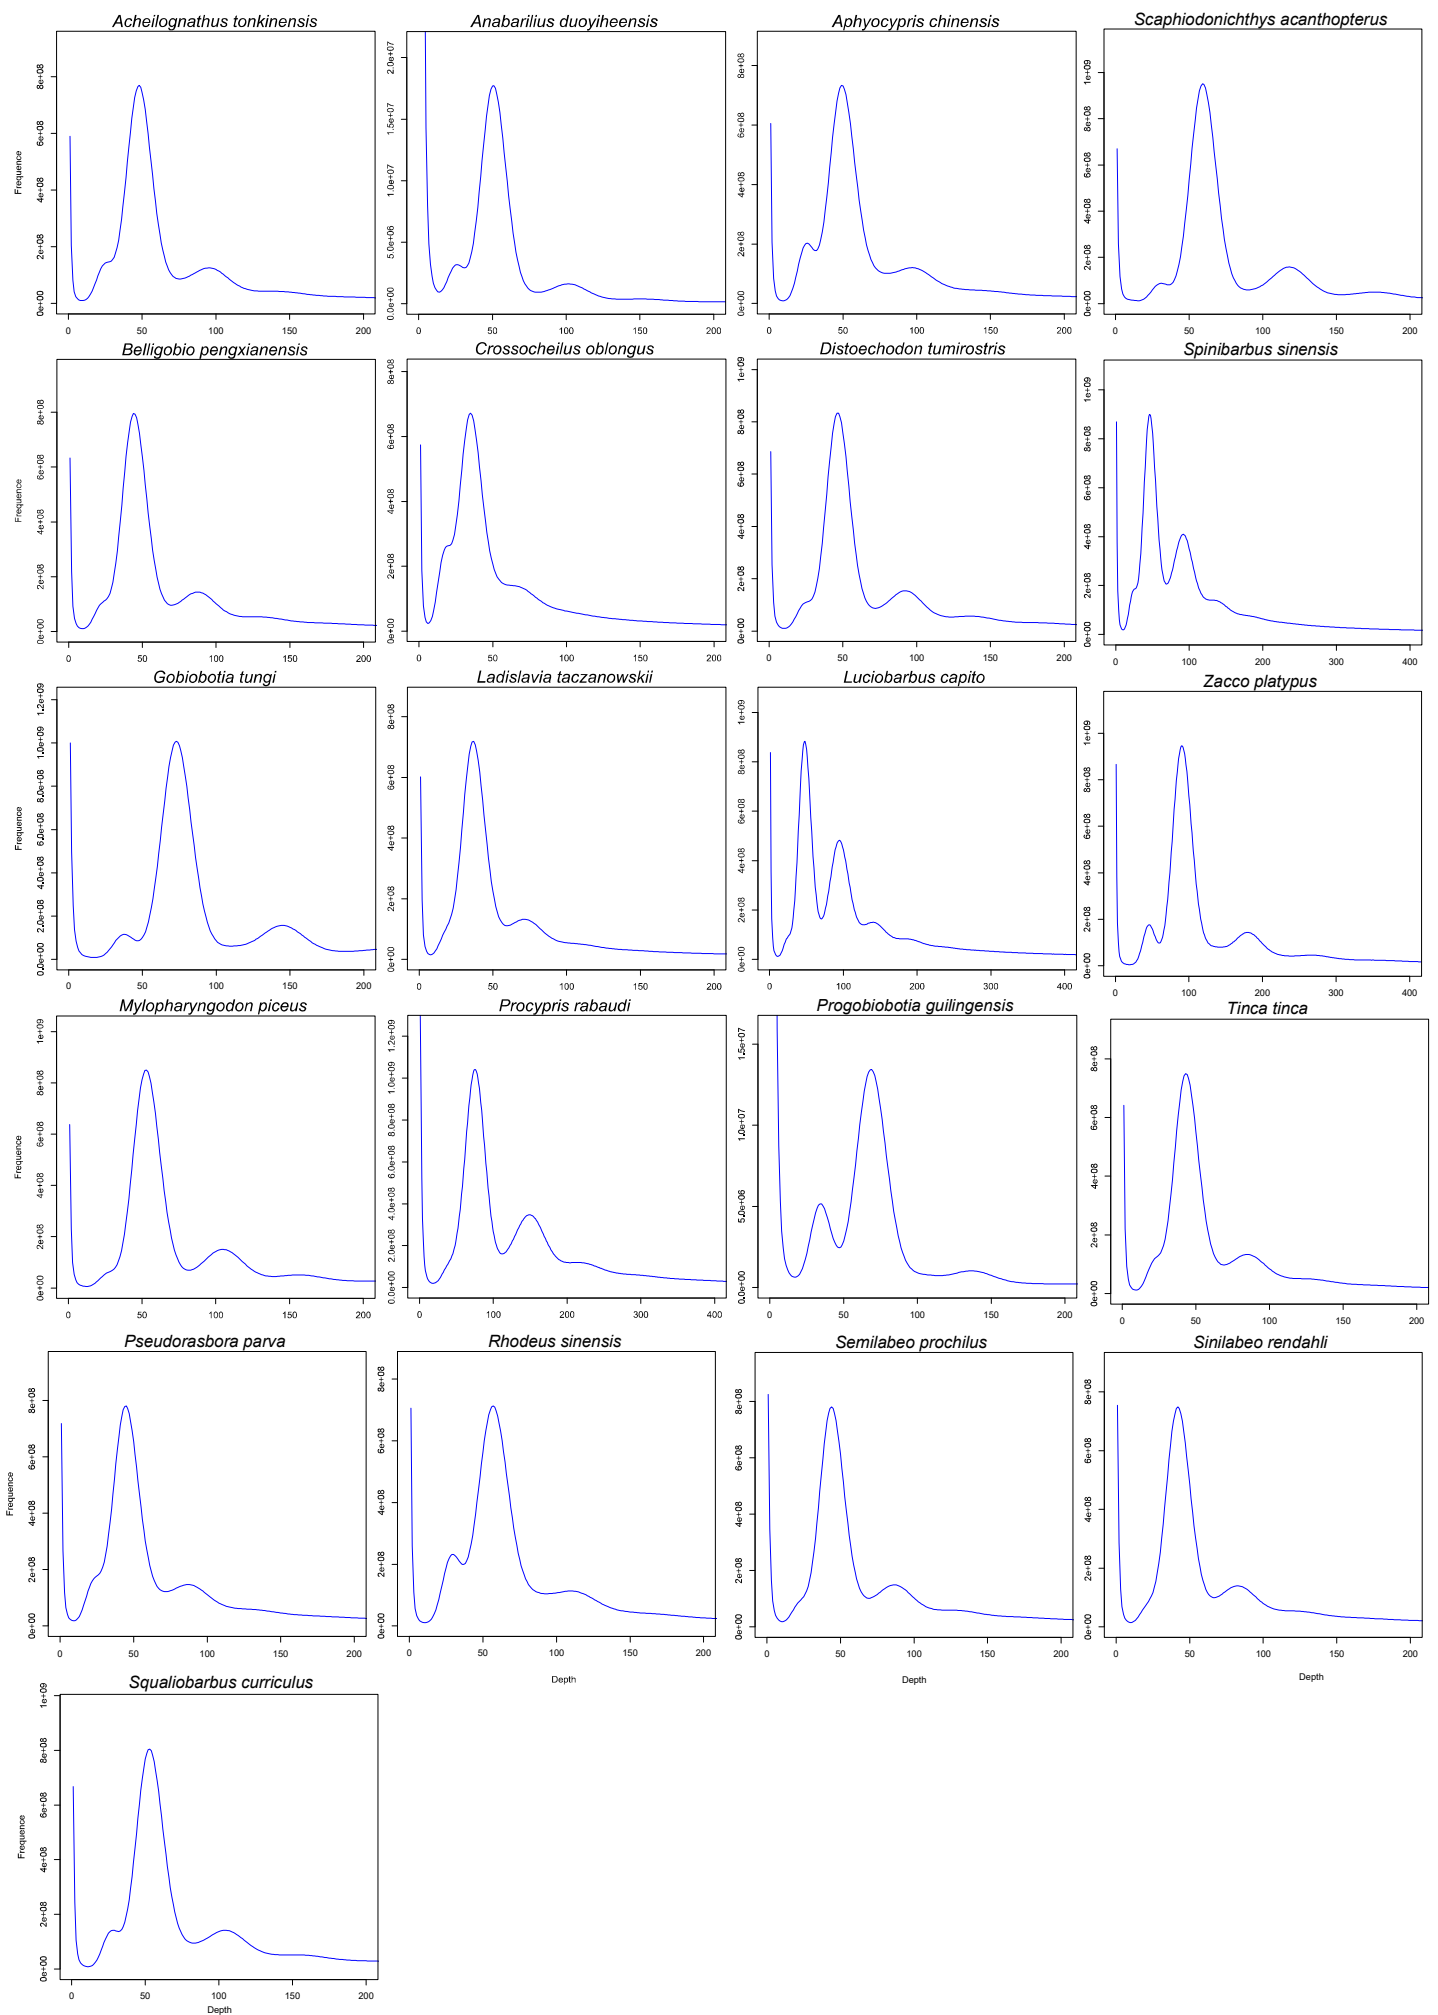

**Supplementary Fig. 1.** The estimation of genome size of 21 cyprinid fishes based on a genomic distribution of 17-mer frequencies.

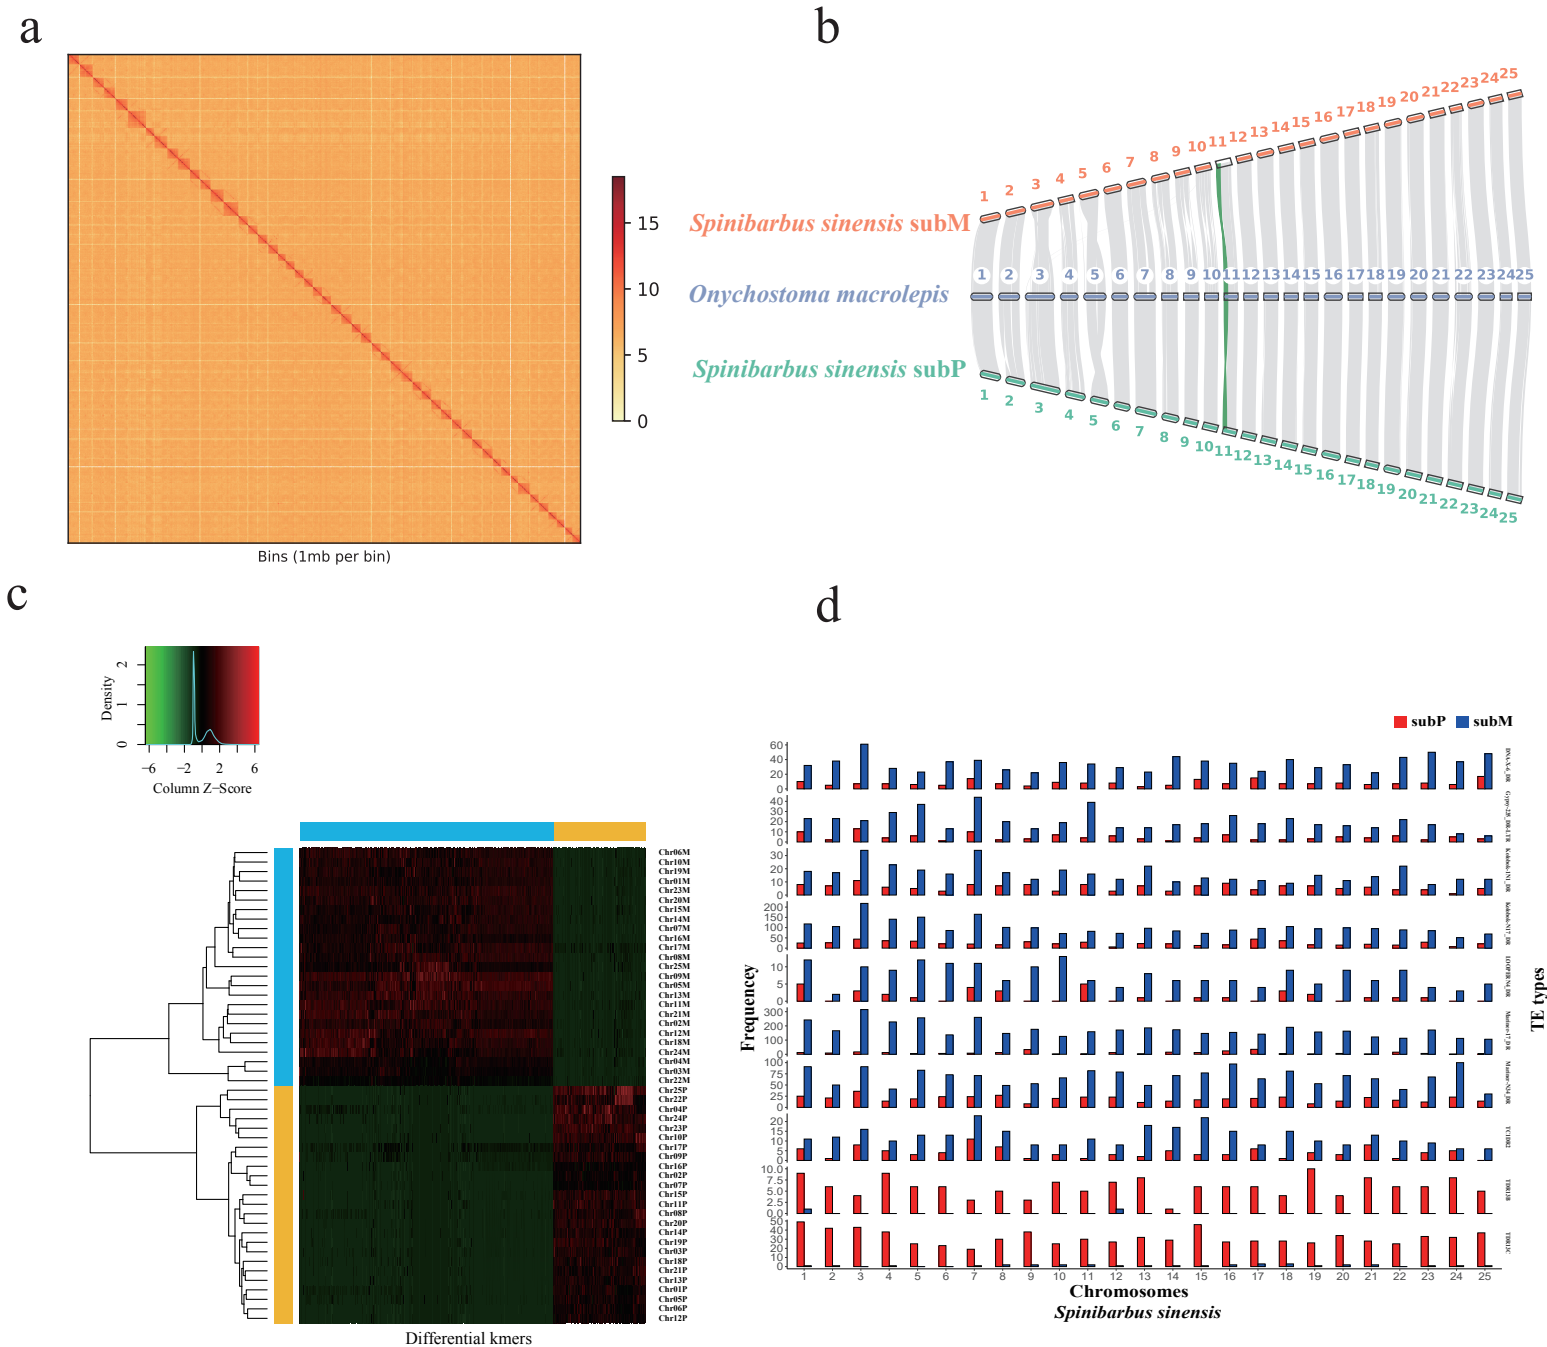

**Supplementary Fig. 2.** Evidence for the allotetraploid origin of *S. sinensis*. **a.** Intensity signal heat map of the high-throughput chromatin conformation capture (Hi-C) chromosome interaction. **b.** Syntenic relationships between *O. macrolepis* and *S. sinensis* subP and subM. The green band showed one example of a collinearity gene between homologous chromosomes. **c.** Heatmap and clustering of differential k-mers. The x-axis, differential k-mers; y-axis, chromosomes. The vertical color bar, each chromosome is assigned to subP and subM; the horizontal color bar, each k-mer is specific to subP and subM. **d.** TE frequency on chromosomes showing subP and subM biased distributions in the tetraploid genome of *S. sinensis*.

**a**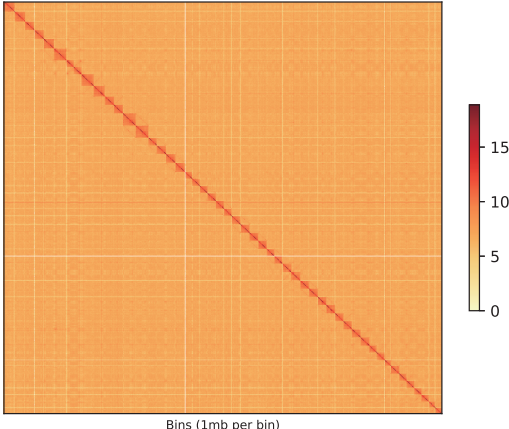

Bins (1mb per bin)

**b**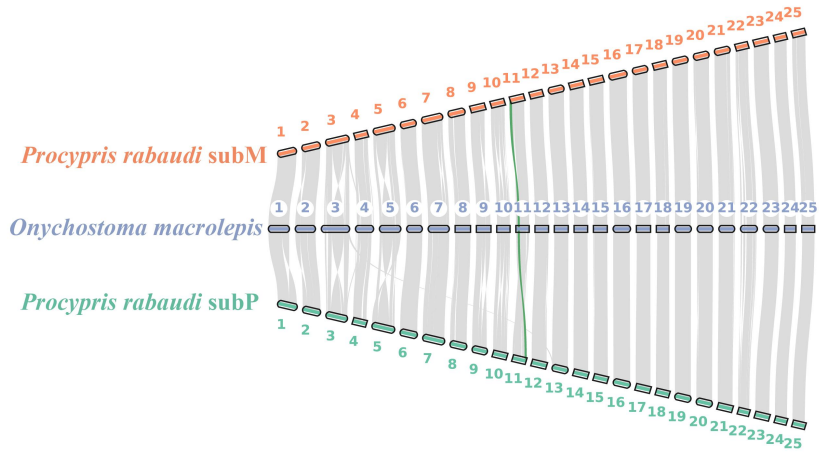**c**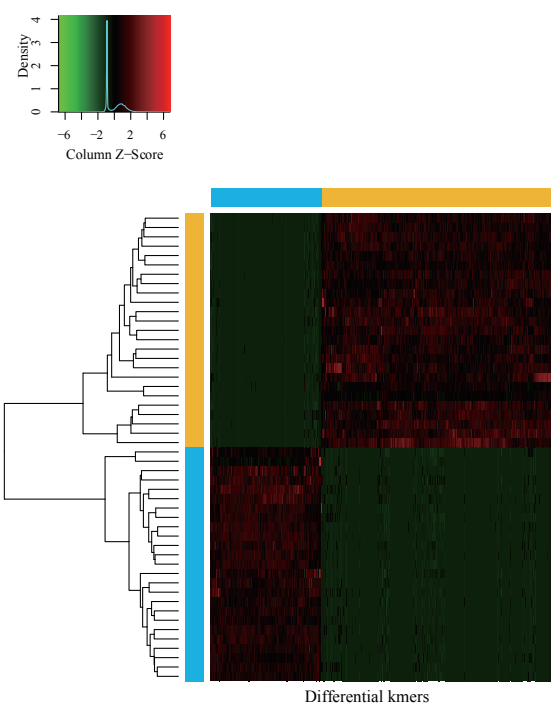

Differential kmers

**d**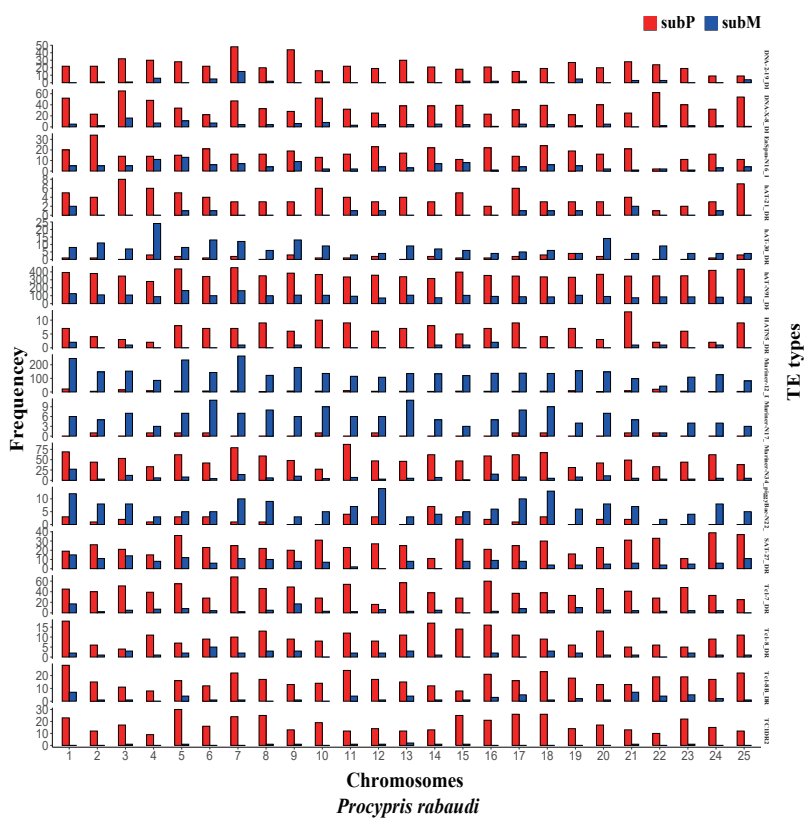Chromosomes  
*Procypris rabaudi*

**Supplementary Fig. 3.** Evidence for the allotetraploid origin of *P. rabaudi*. Evidence for the allotetraploid origin of *P. rabaudi*. **a.** Intensity signal heat map of the high-throughput chromatin conformation capture (Hi-C) chromosome interaction. **b.** Syntenic relationships between *O. macrolepis* and *P. rabaudi* subP and subM. The green band showed one example of a collinearity gene between homologous chromosomes. **c.** Heatmap and clustering of differential k-mers. The x-axis, differential k-mers; y-axis, chromosomes. The vertical color bar, each chromosome is assigned to subP and subM; the horizontal color bar, each k-mer is specific to subP and subM. **d.** TE frequency on chromosomes showing subP and subM biased distributions in the tetraploid genome of *P. rabaudi*.

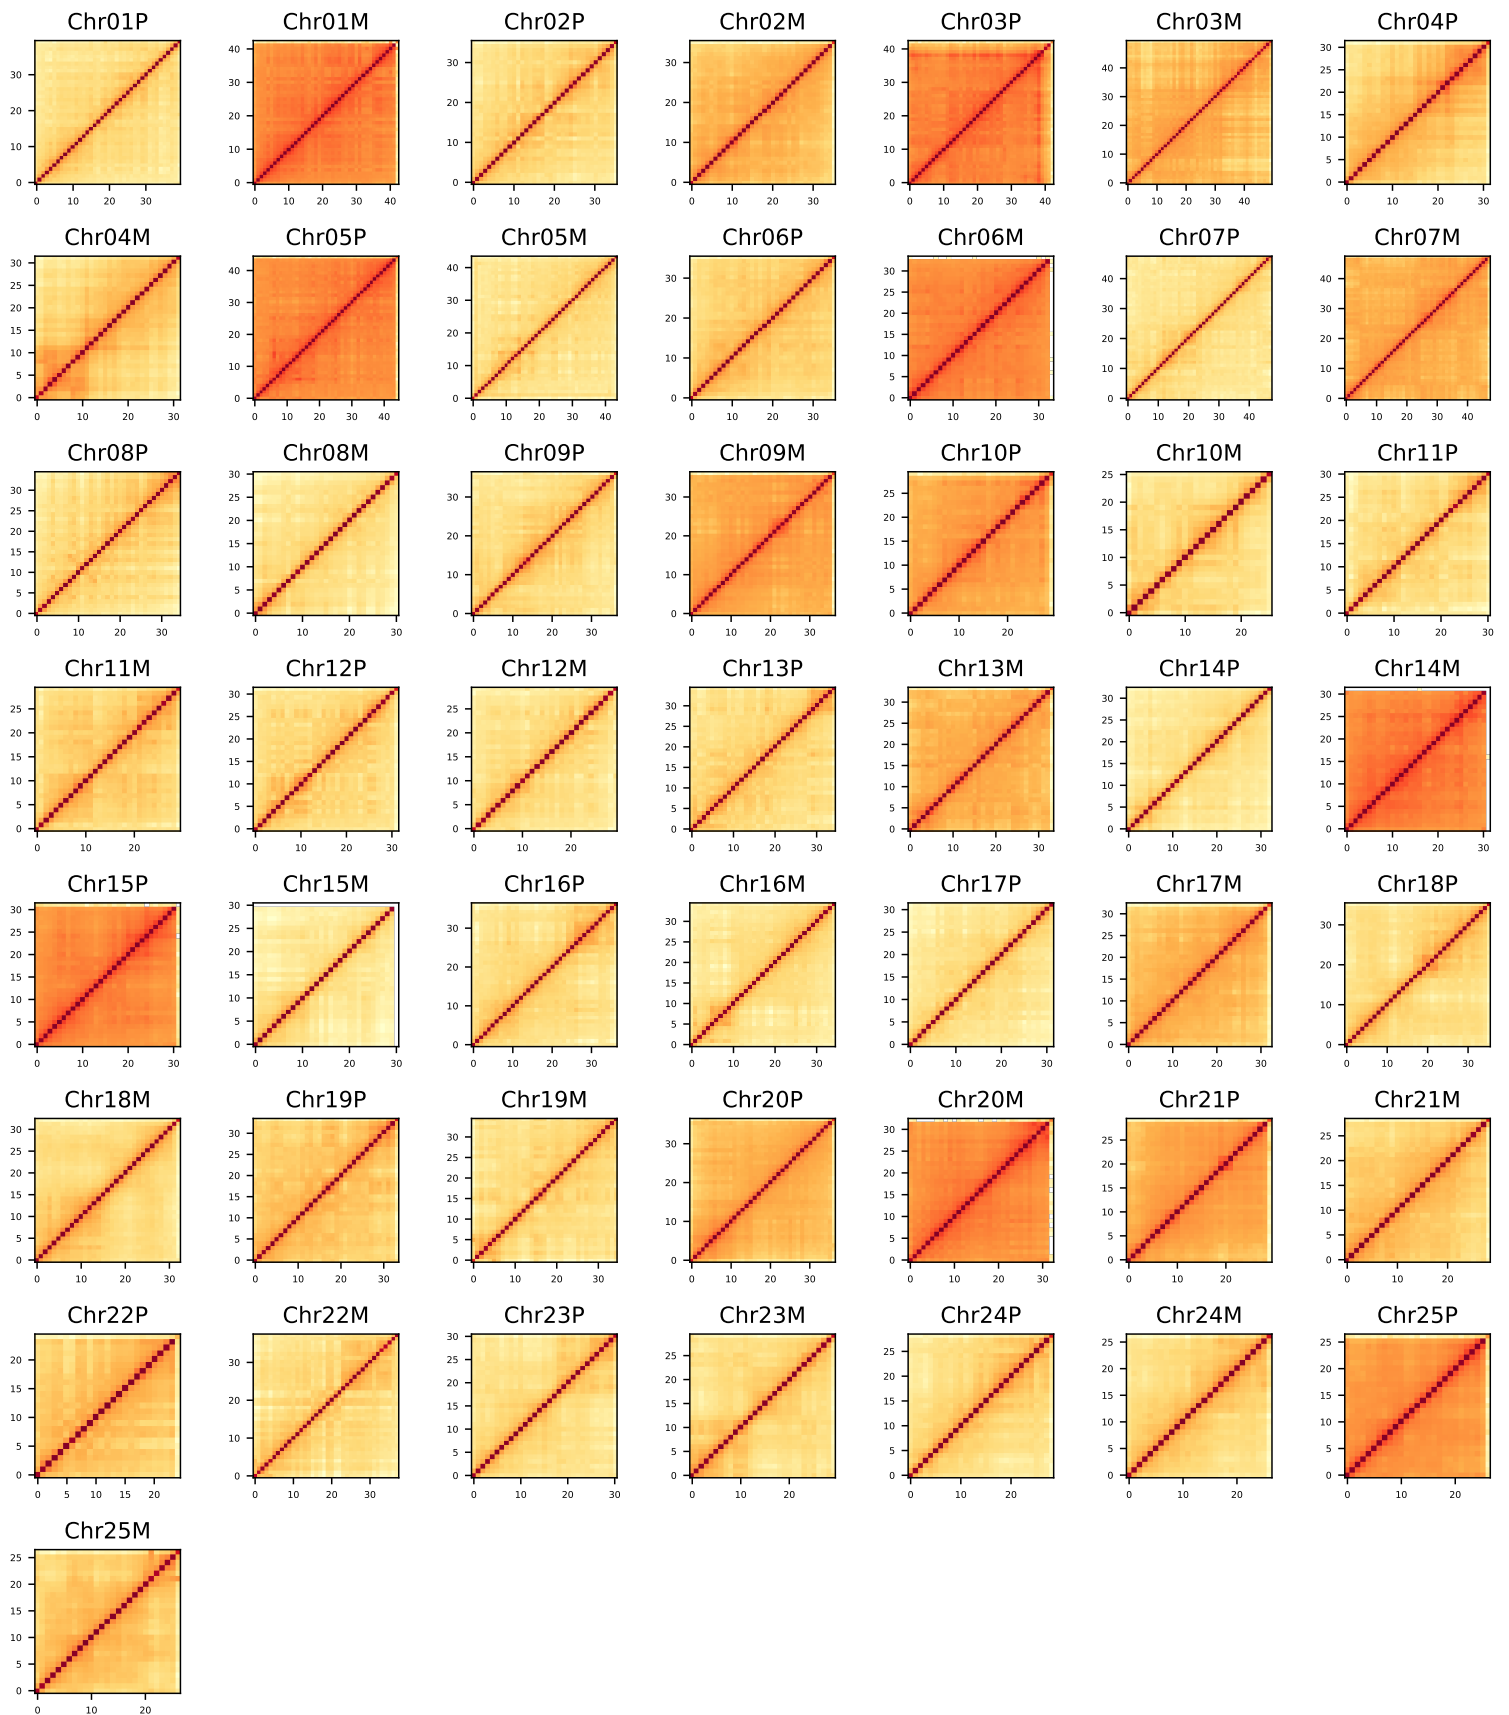

**Supplementary Fig. 4.** Heatmap of intensity signals of per chromosome Hi-C interactions in allotetraploid *L. capito*.

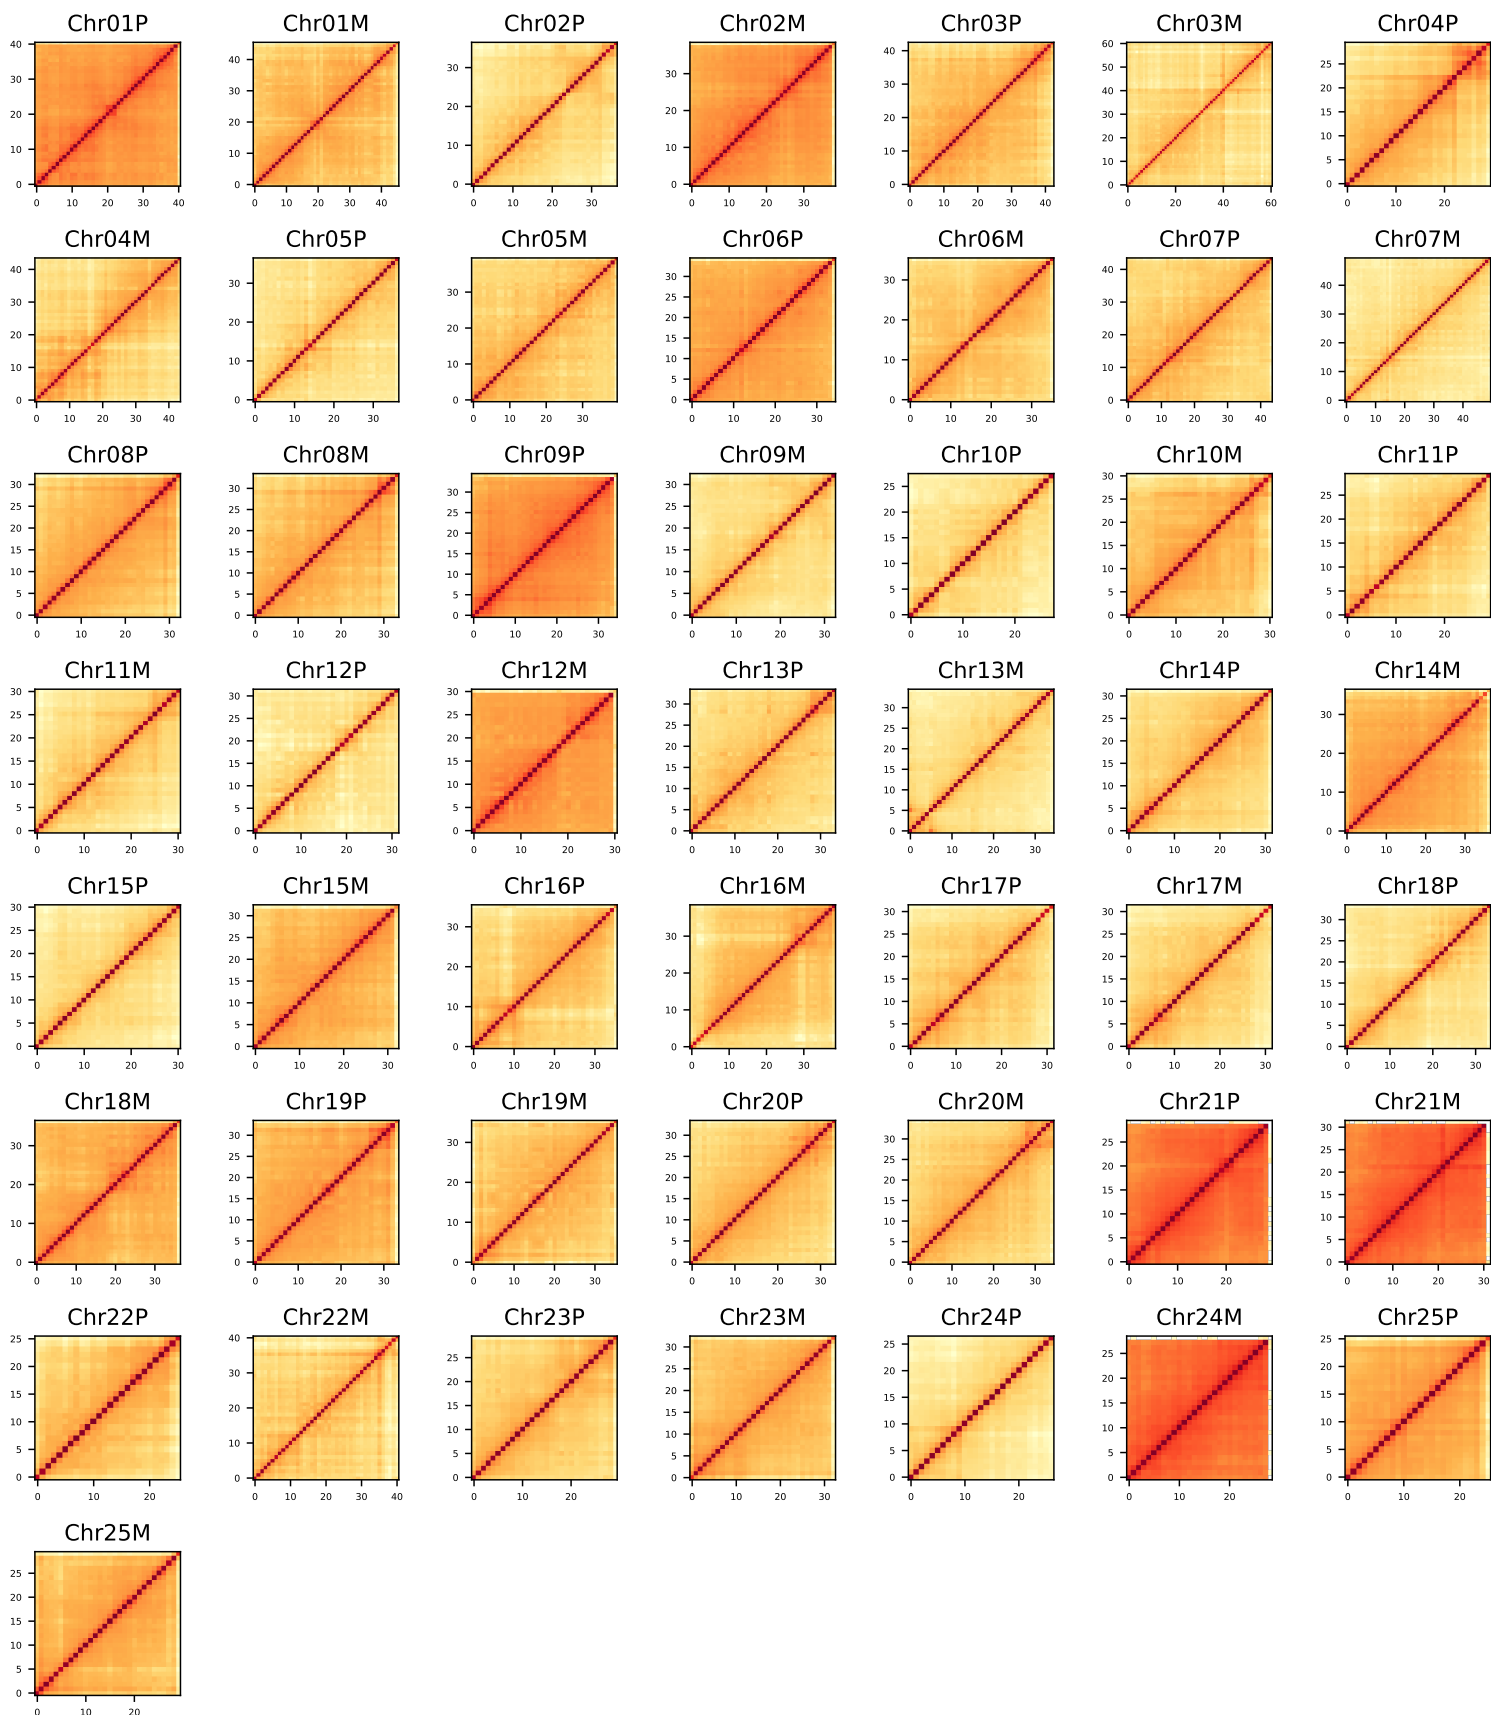

**Supplementary Fig. 5.** Heatmap of intensity signals of per chromosome Hi-C interactions in allotetraploid *P. rabaudi*.



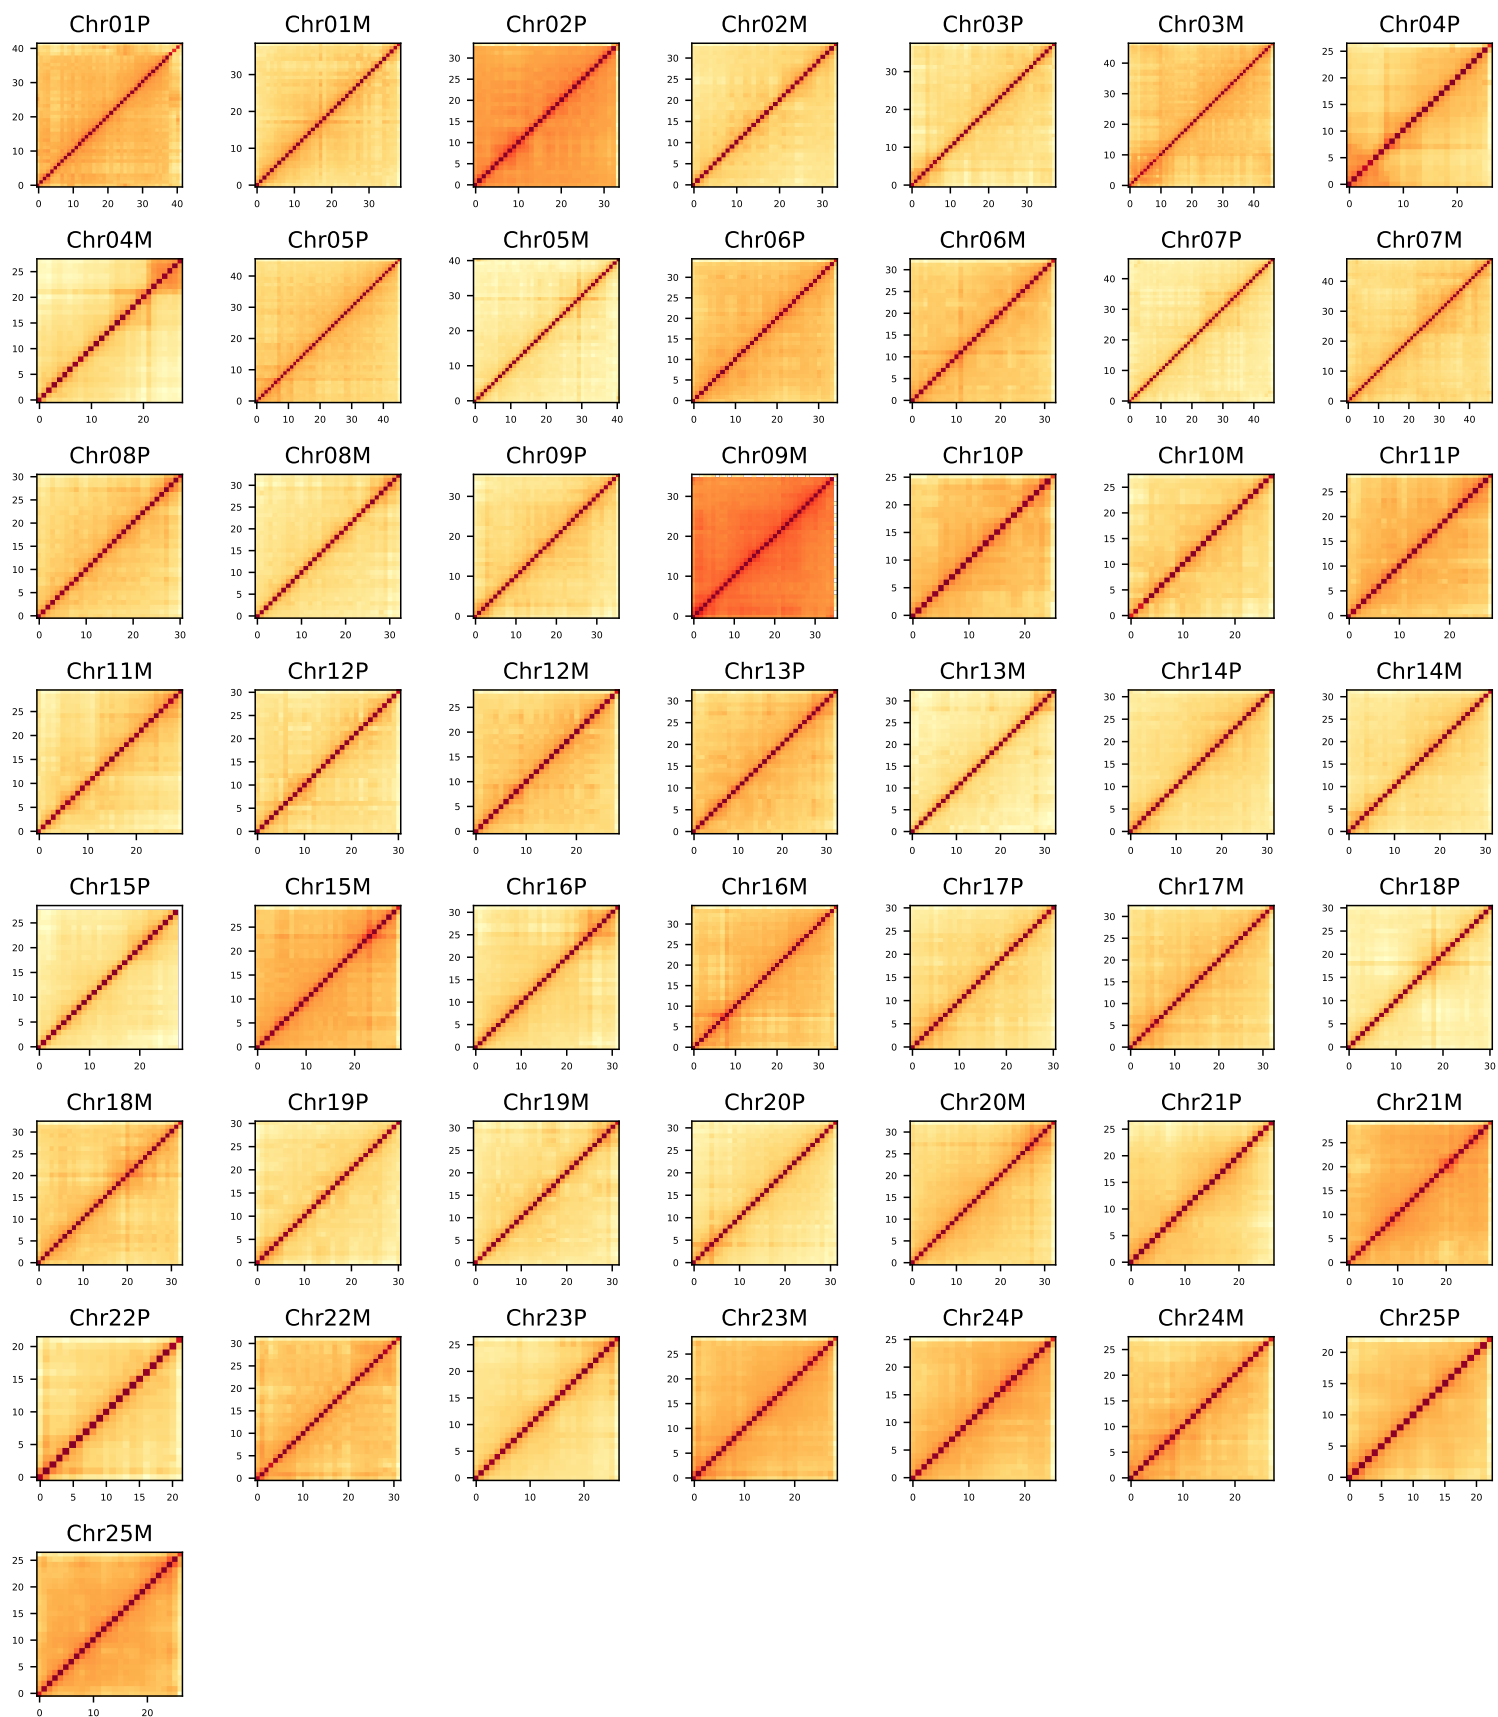

**Supplementary Fig. 6.** Heatmap of intensity signals of per chromosome Hi-C interactions in allotetraploid *S. sinensis*.

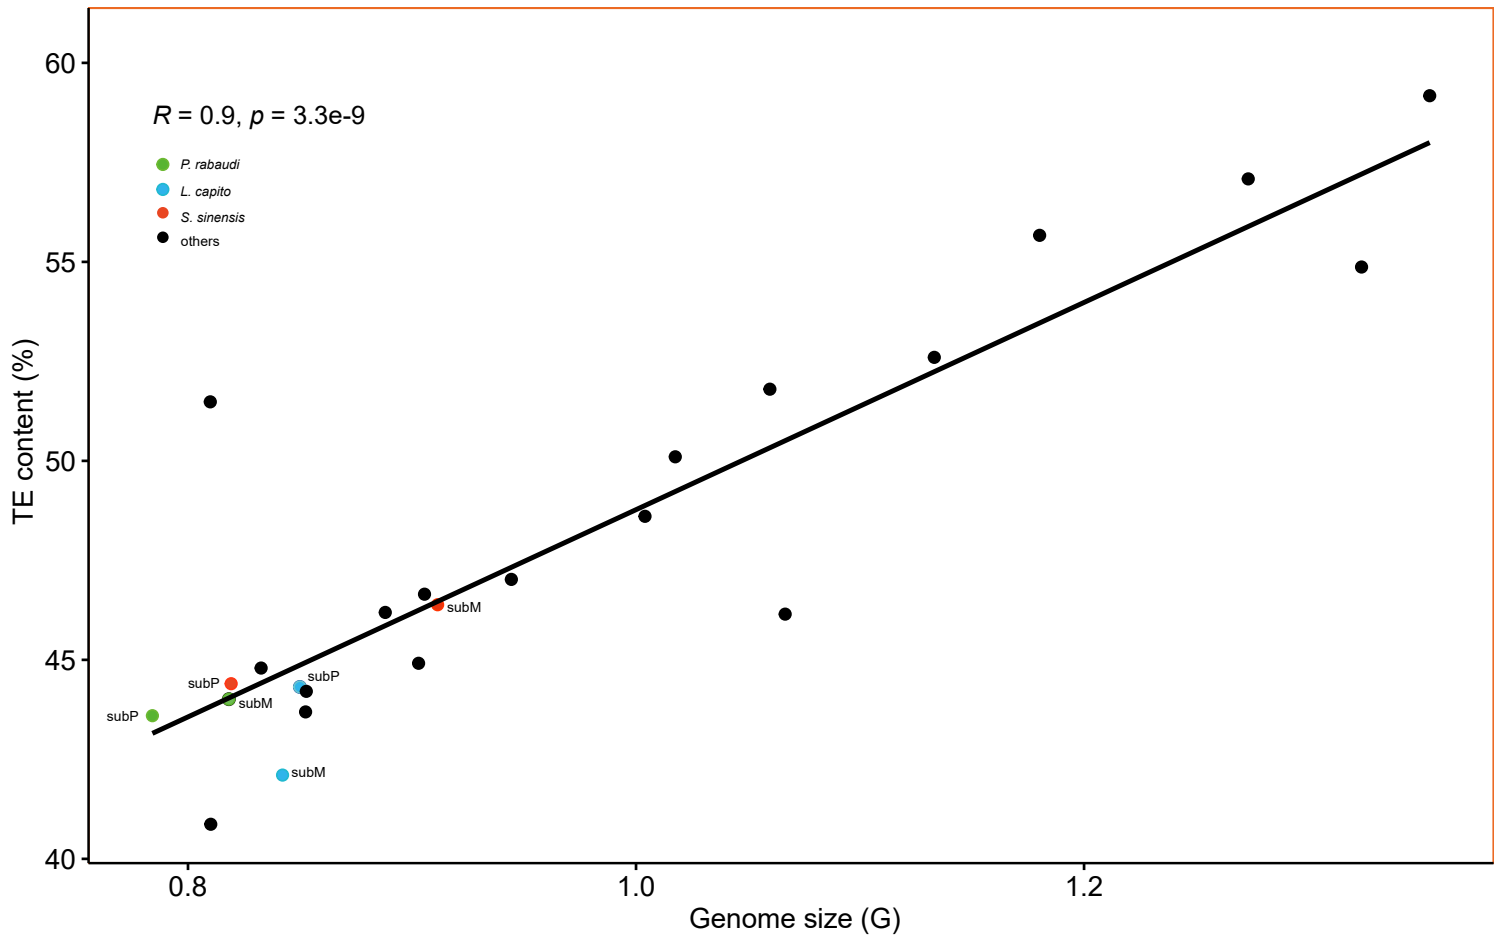

**Supplementary Fig. 7.** The correlated relationship between genome size and TEs in 21 cyprinids using the spearman method. TE content in subP and subM of *P. rhabaudi*, *L. capito* and *S. sinensis* were shown using green, blue and red solid circle, respectively.

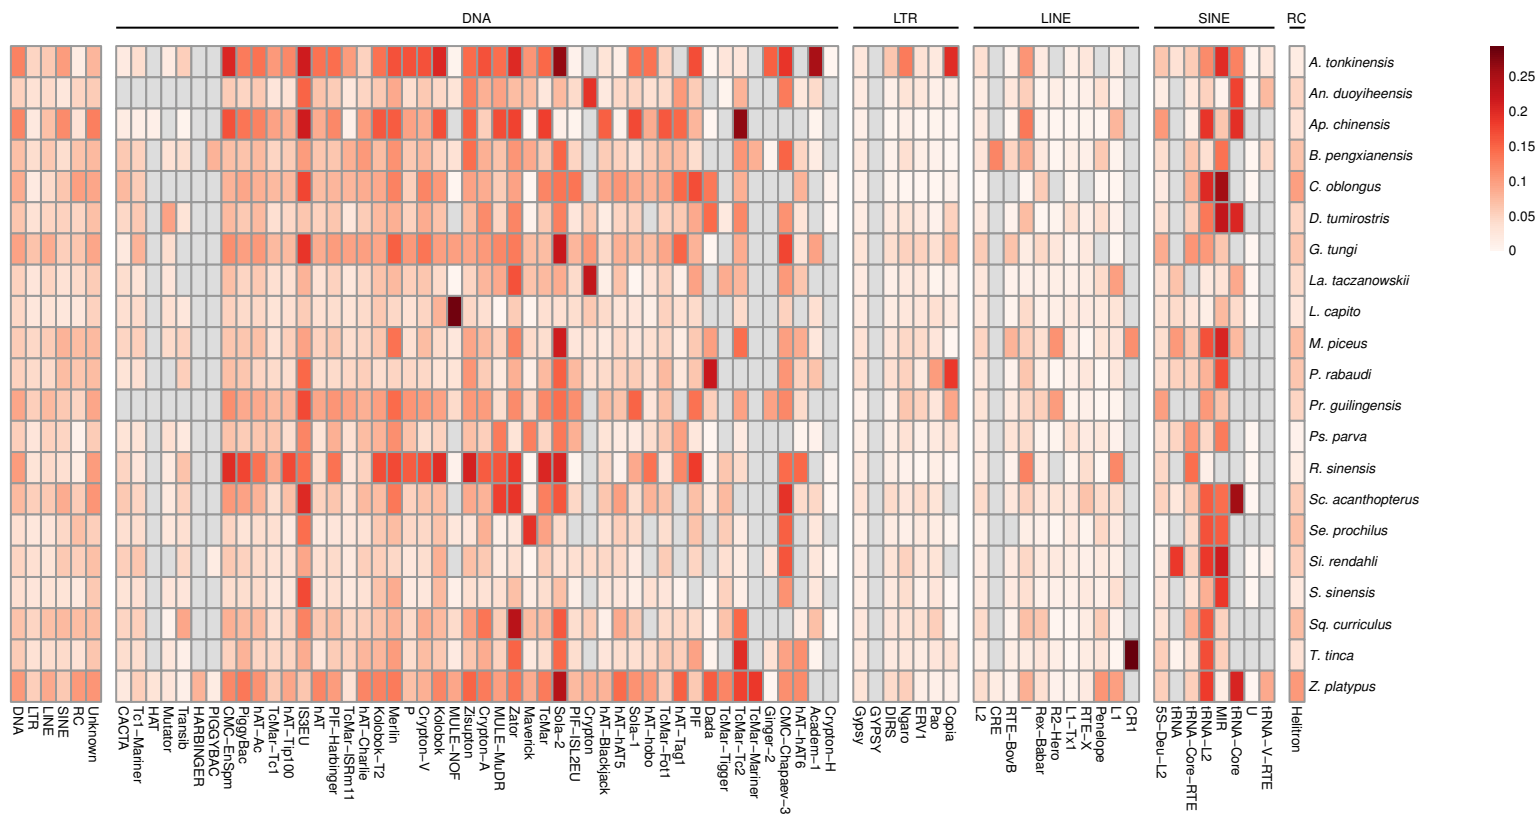

**Supplementary Fig. 8.** Summary of TE age across species. Heatmap depicts the median age (across all insertions) of given TE classes (DNA, LTR, SINE, LINE, RC, and others) and TE superfamilies.

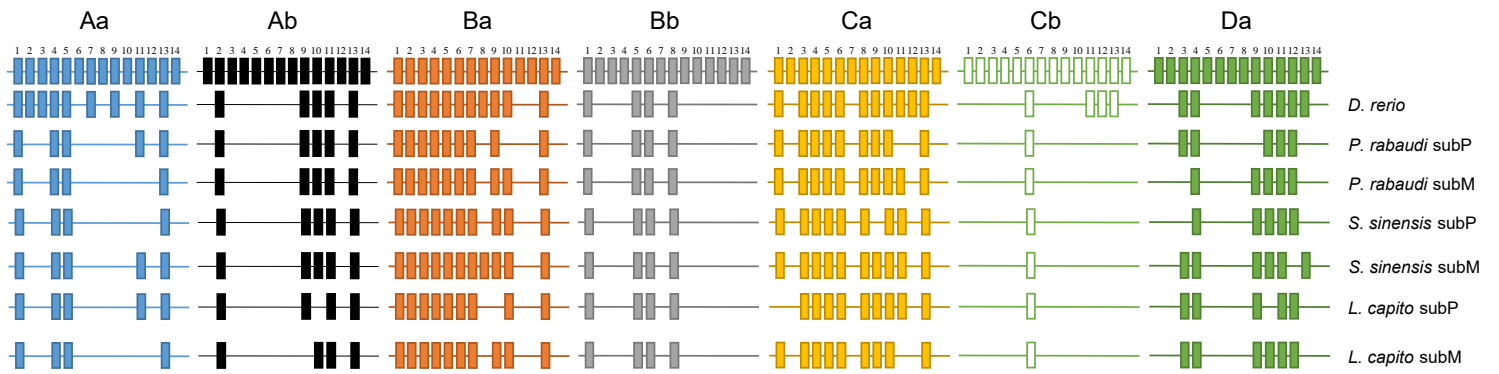

**Supplementary Fig. 9.** Putative homeobox genes identified in the assembly of *P. rabaudi*, *S. sinensis* and *L. capito*.

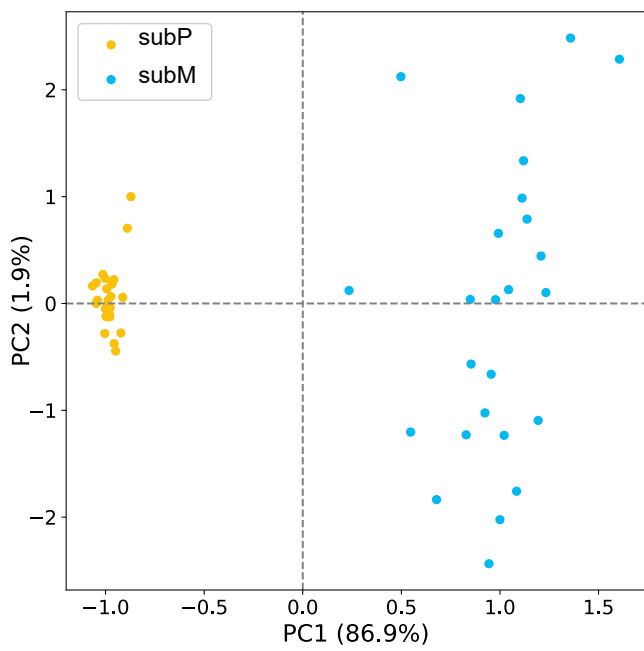

*L. capito*

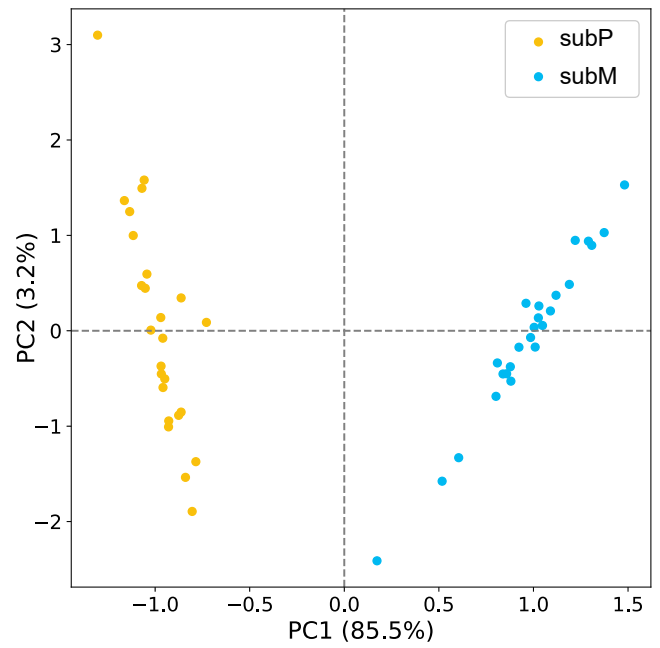

*S. sinensis*

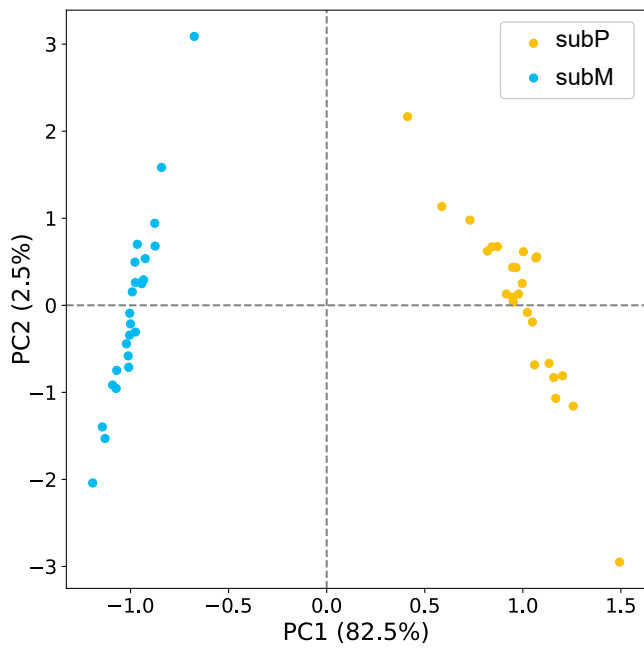

*P. rabaudi*

**Supplementary Fig. 10.** Principal component analysis (PCA) of differential k-mers in *L. capito*, *P. rabaudi*, and *S. sinensis*, respectively. Points indicate chromosomes.

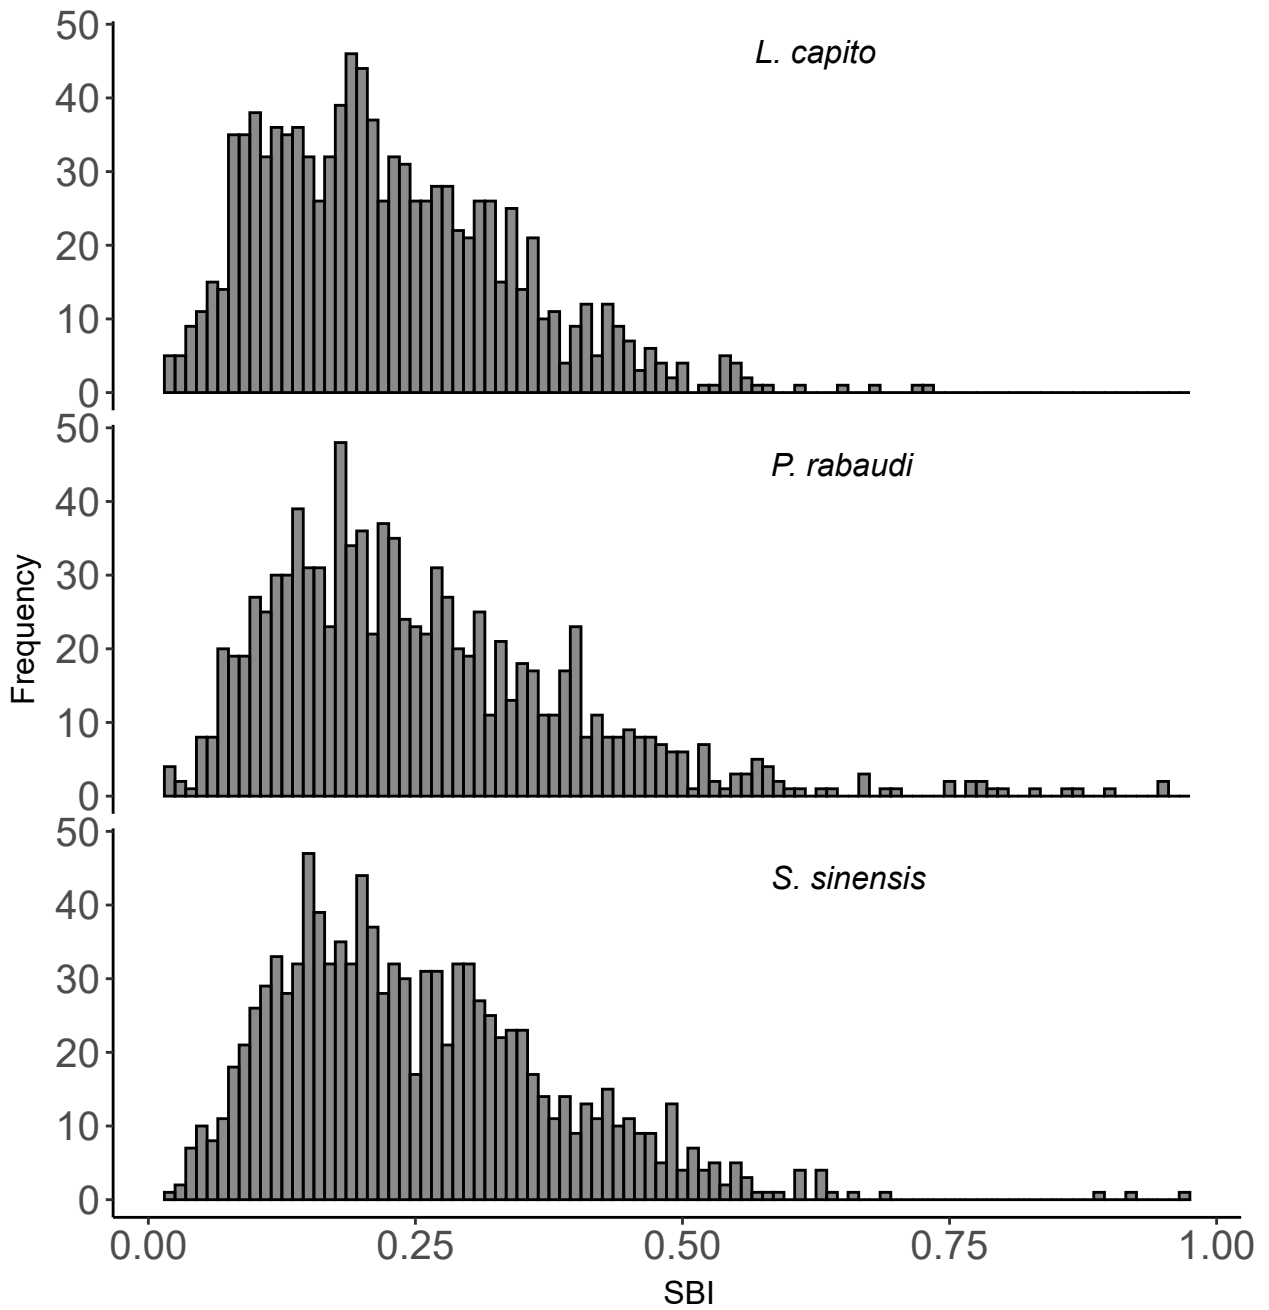

**Supplementary Fig. 11.** The distribution of subgenome-biased index (SBI) for TEs in the reference genome of three allotetraploids.

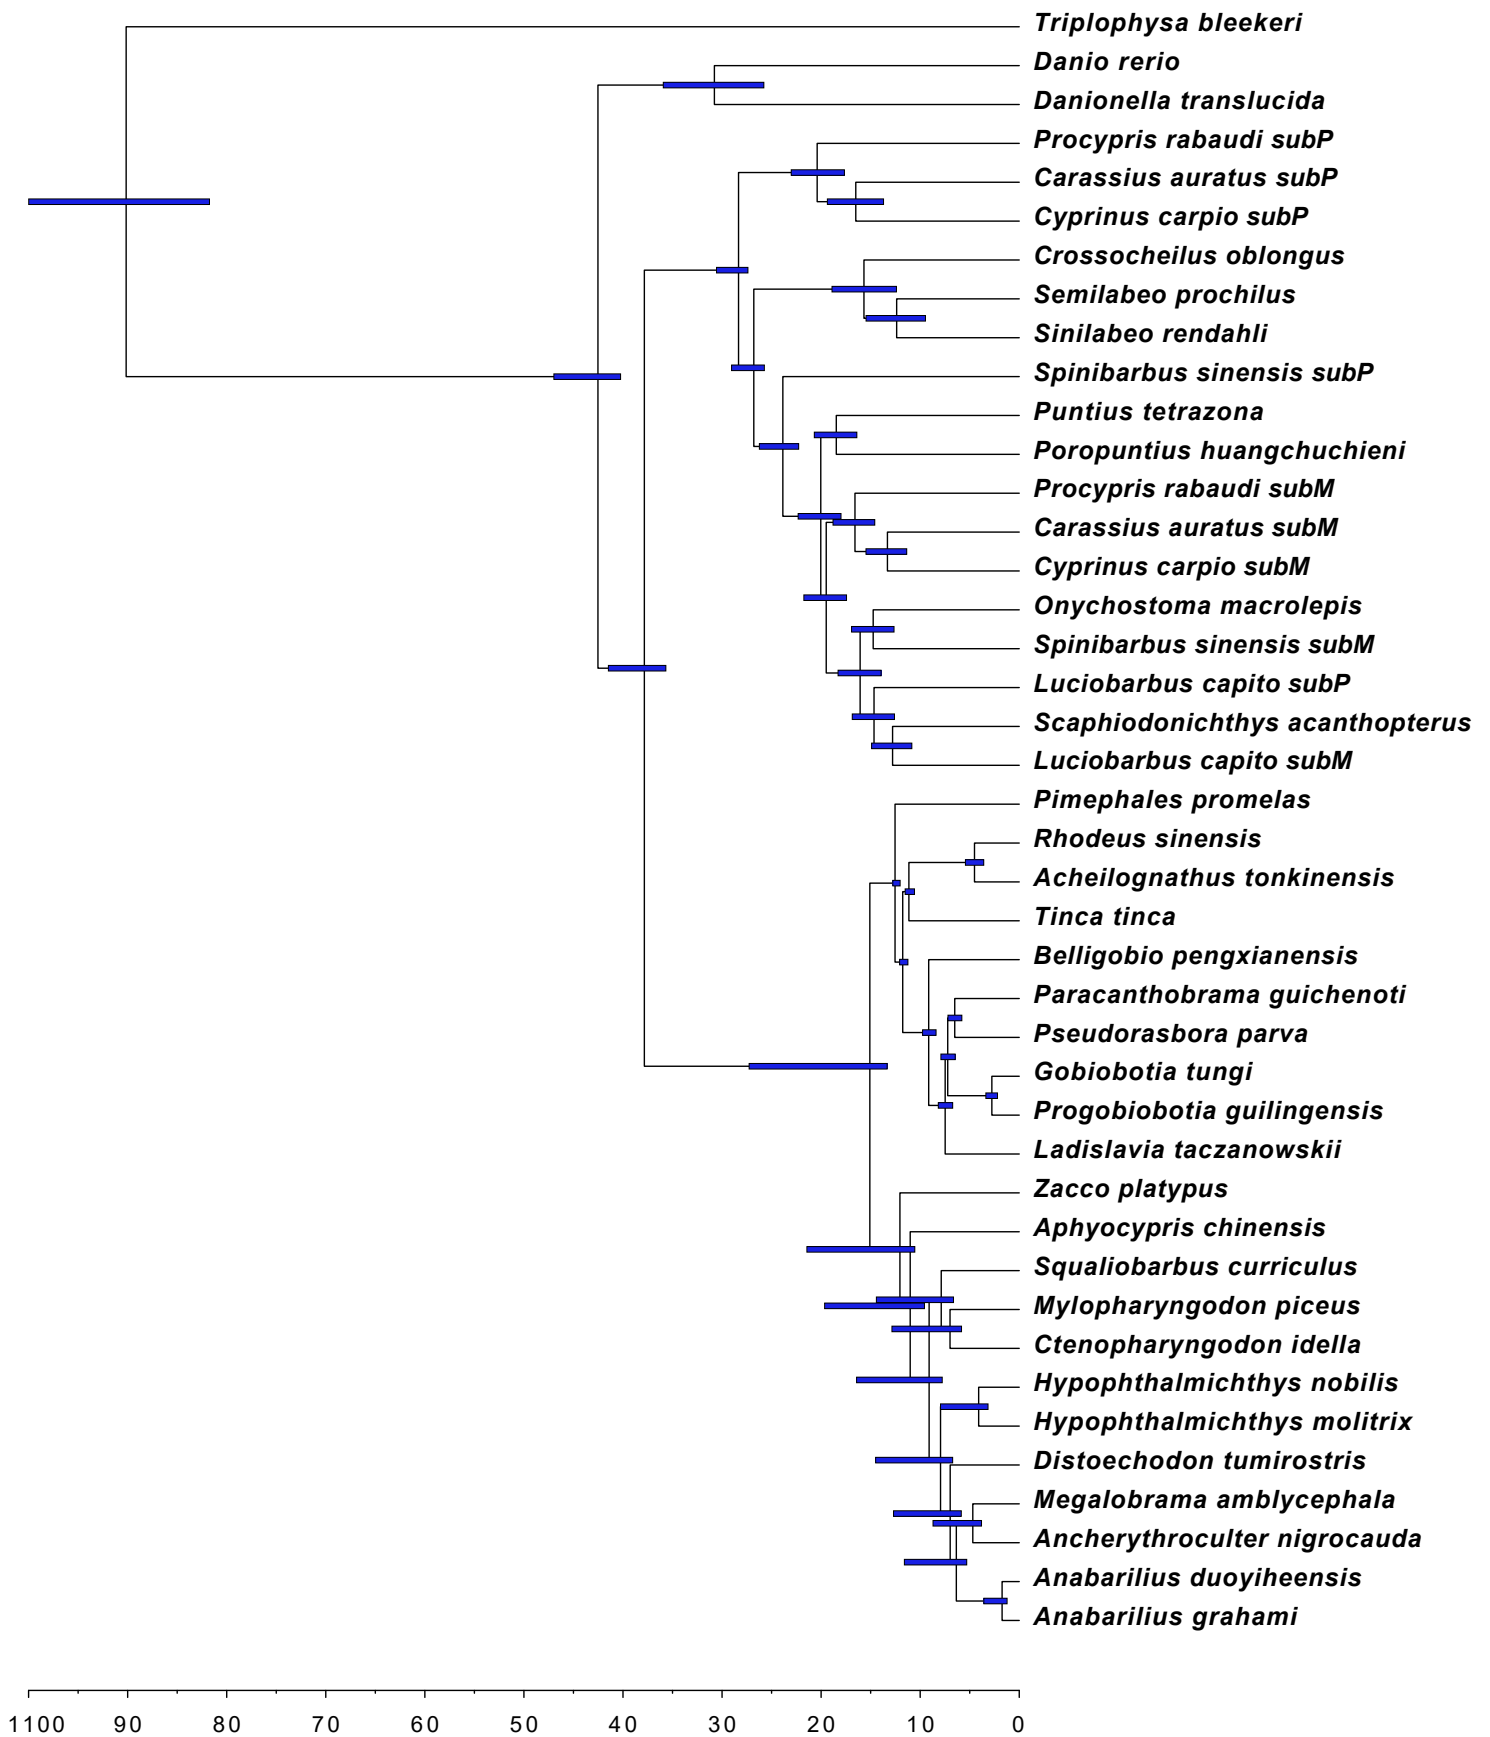

**Supplementary Fig. 12.** Divergence times within the Cyprinidae family and between subgenomes of five allotetraploids inferred by MCMCTree. Species tree constructed using IQ-TREE based on CDS of 300 one-to-one orthologues. *Triplophysa bleekeri* was used as the outgroup. See Supplementary Fig. 13.

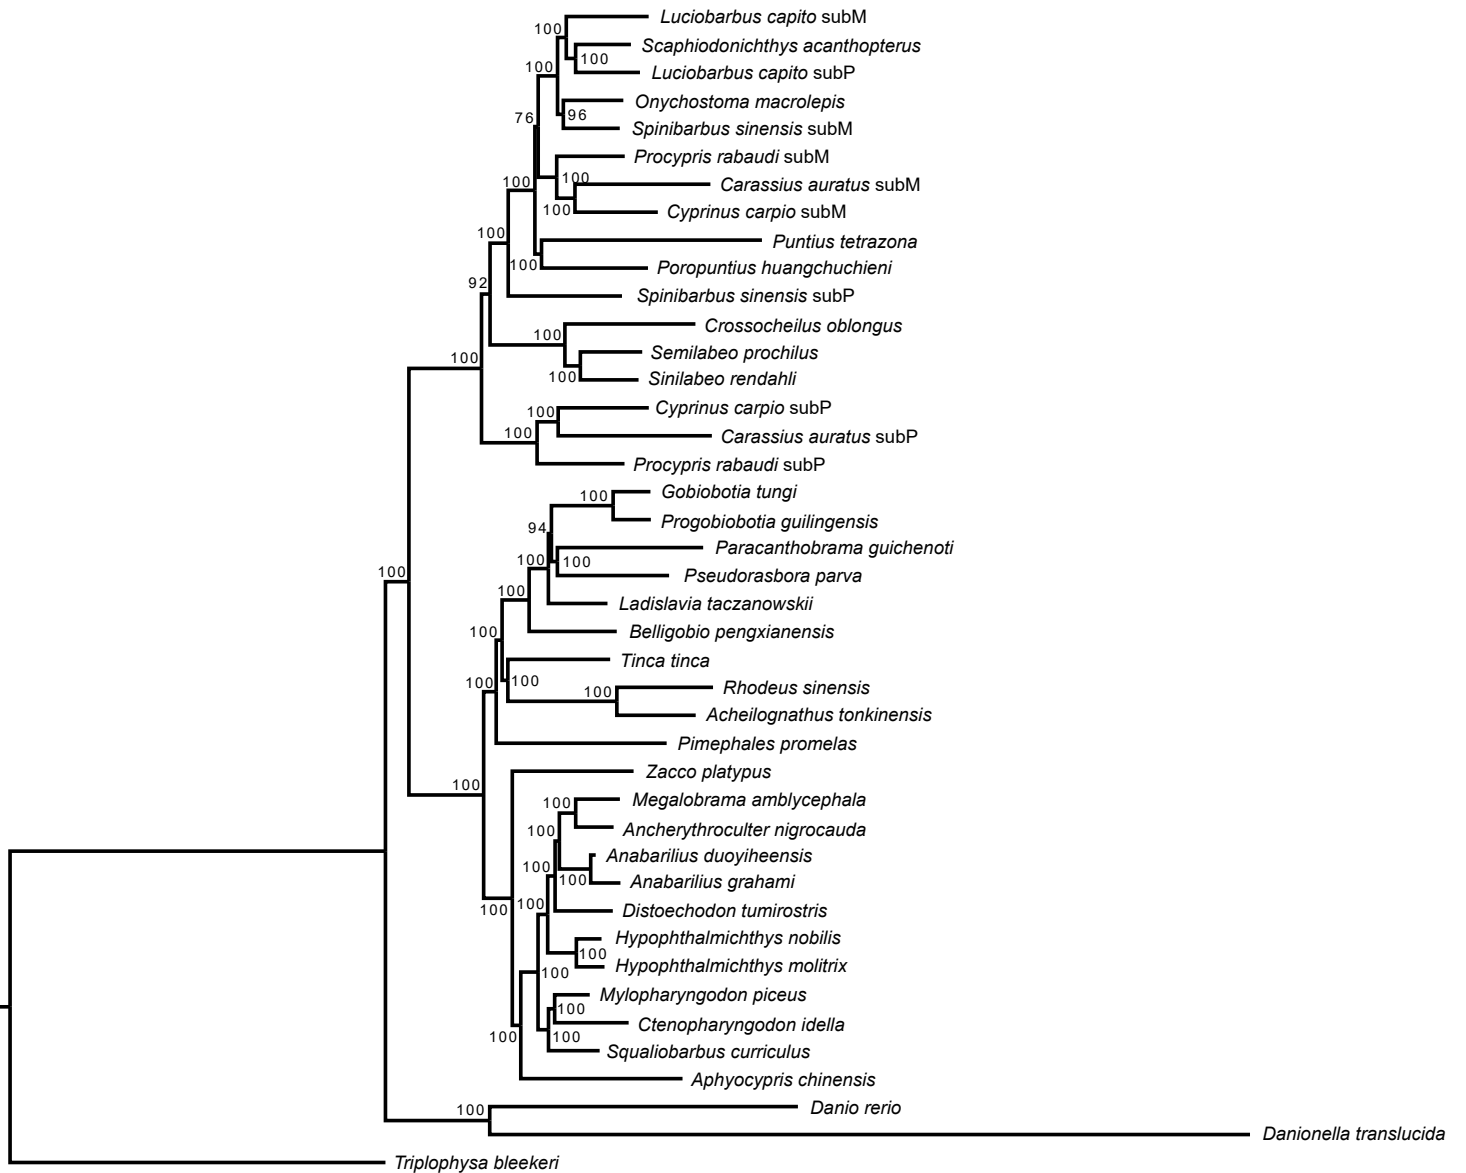

**Supplementary Fig. 13.** A Maximum Likelihood (ML) phylogenetic tree of the Cyprinidae family on the basis of CDS of 300 one-to-one orthologues using IQ-TREE. *T. bleekeri* was used as the outgroup. Bootstrap values supporting on each node are calculated with 1000 replicates.



Tree scale: 0.1

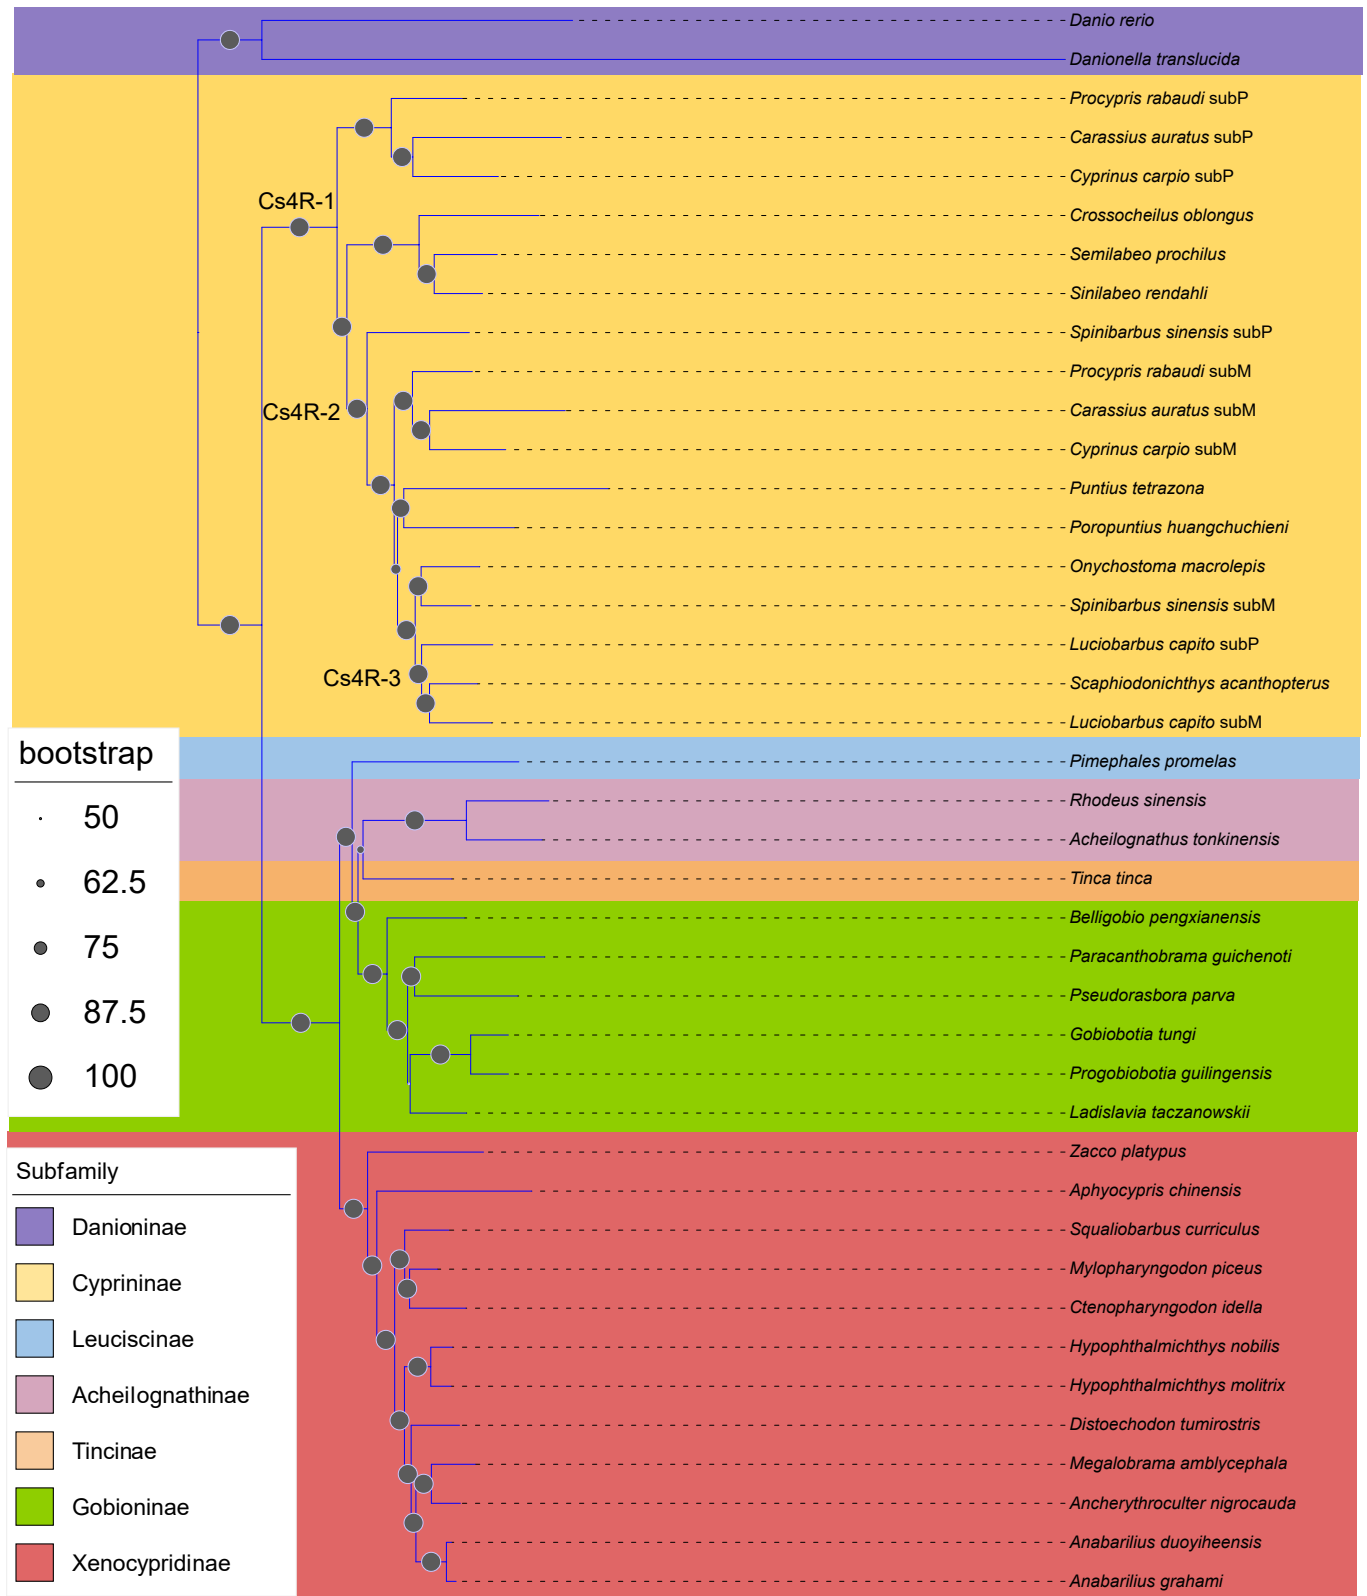

**Supplementary Fig. 14.** A Maximum Likelihood (ML) phylogenetic tree of the Cyprinidae family on the basis of CDS of 310 one-to-one orthologues using RAxML. Zebrafish and *Danionella translucida* were used as the outgroup.

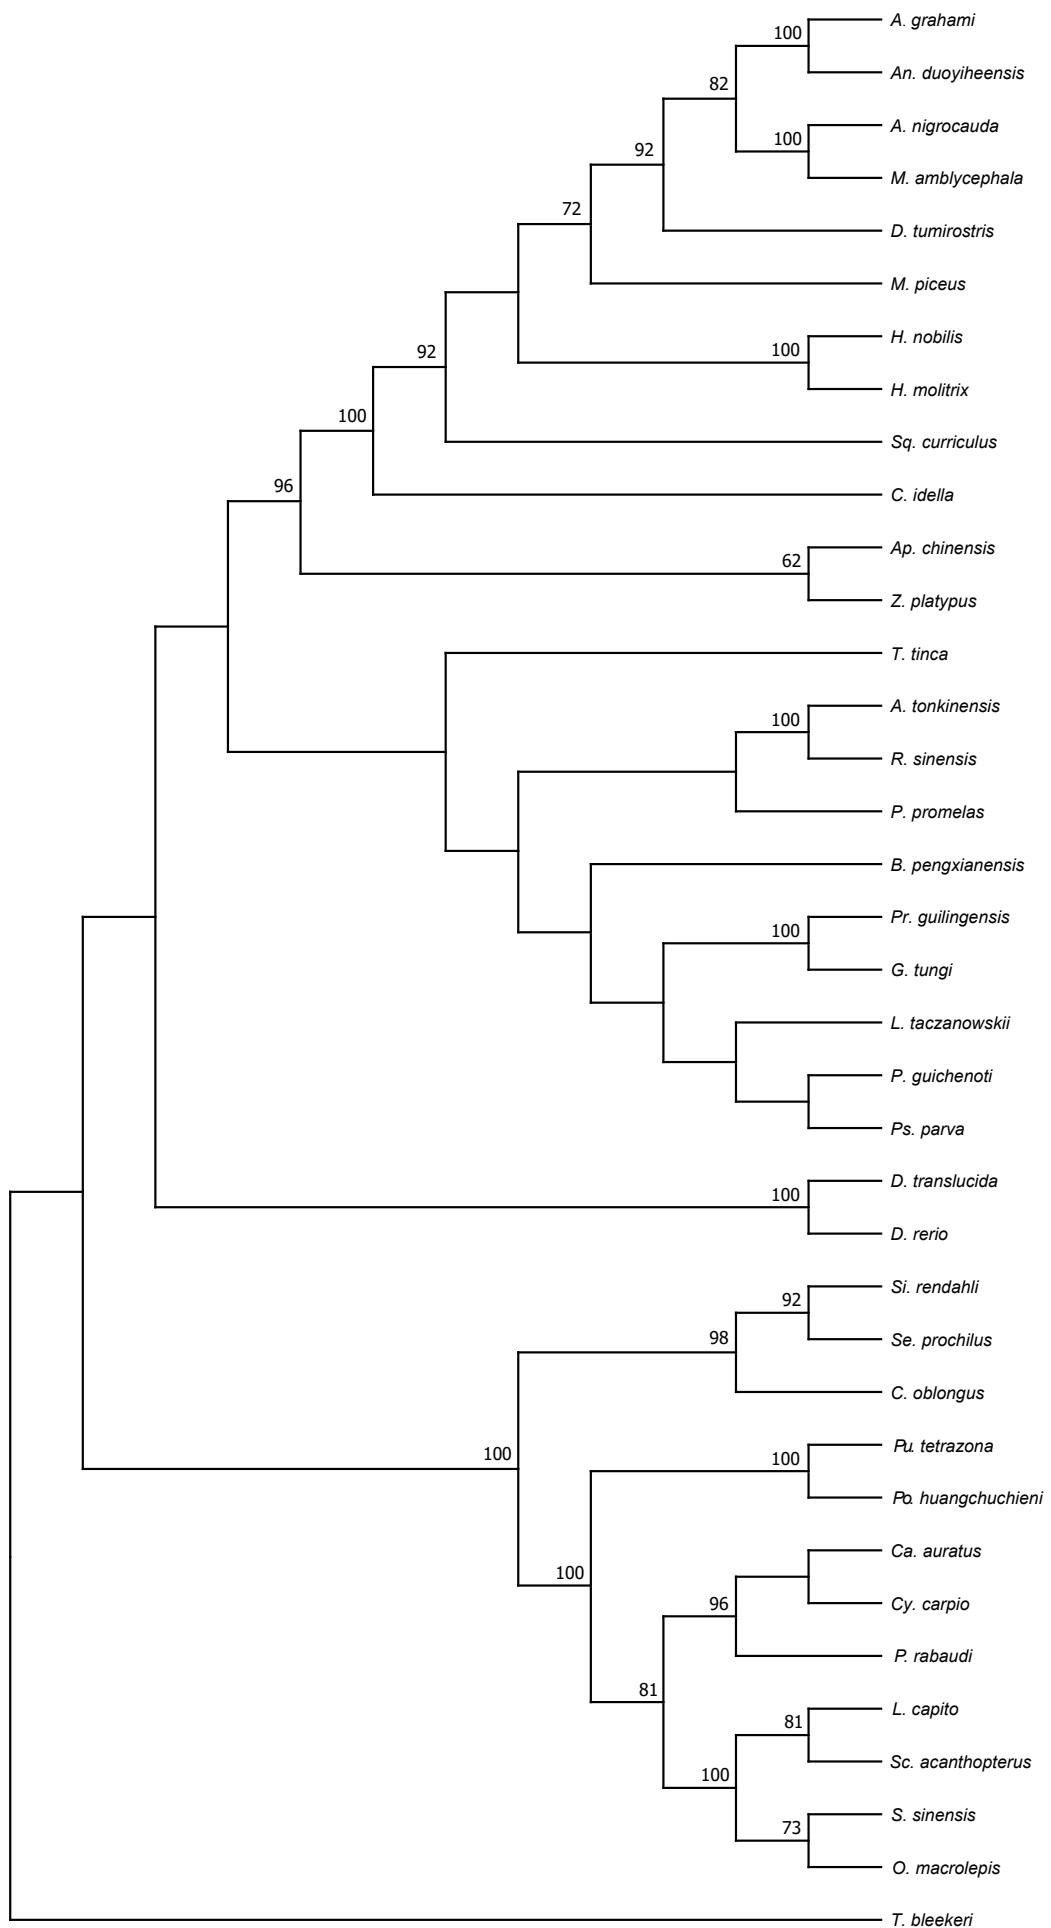

**Supplementary Fig. 15.** A phylogeny of the Cyprinidae family based on mitochondria genomes. We used mitochondrial genomes of 37 species to infer this phylogeny by RAxML using *T. bleekeri* as the outgroup. Bootstrap values lower than 60 were not shown.

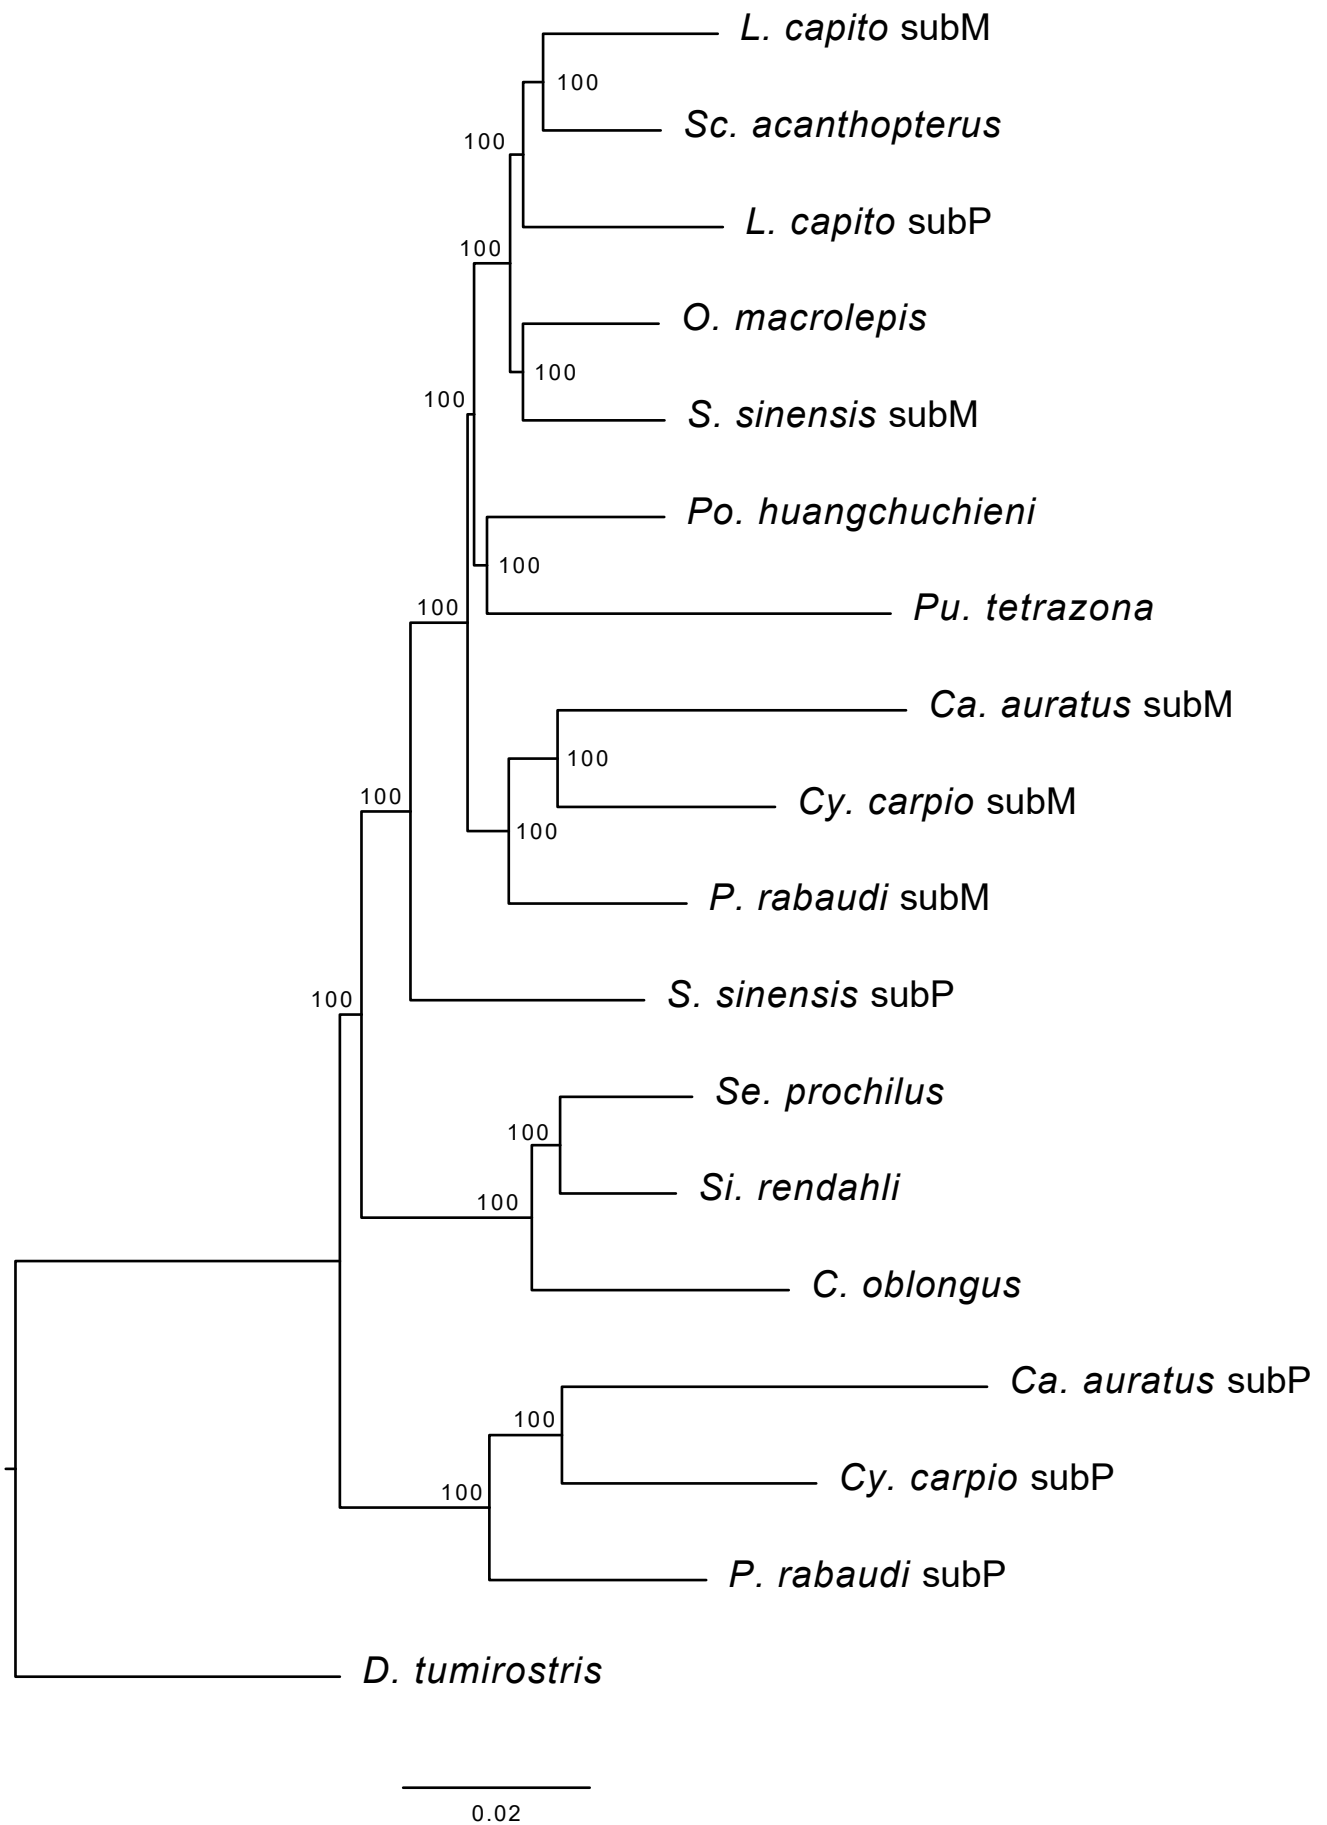

**Supplementary Fig. 16.** A ML tree made from the whole genome alignment (WGA). The WGA of 13 cyprinid fishes was used for building the ML phylogenetic tree by RAxML. Numbers on the nodes represent the support values from 200 bootstrap tests. We used *Distoechodon tumirostris* as the outgroup.

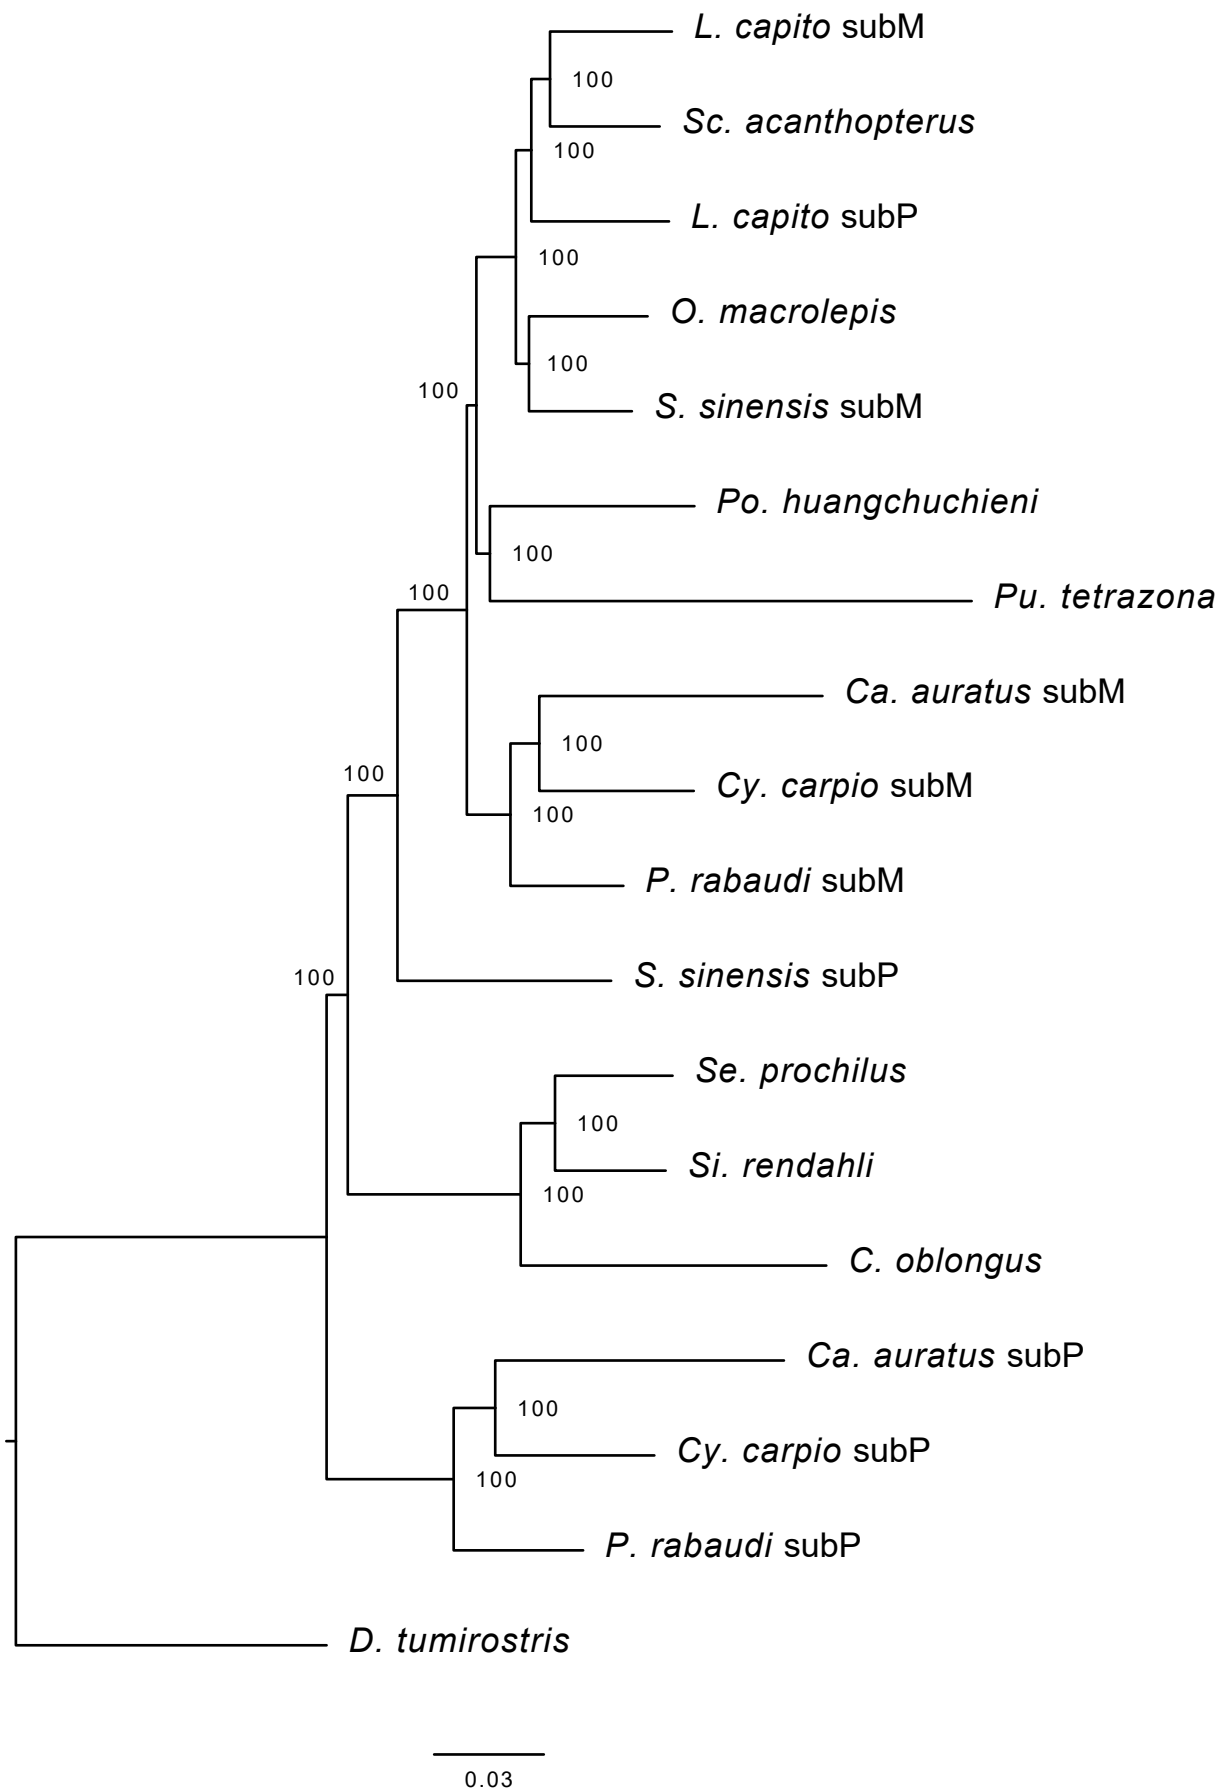

**Supplementary Fig. 17.** A ML phylogenetic tree generated from 4d sites. 252,437 4d sites of 1,669 single-copy orthologs from 13 cyprinid fishes were identified and used for constructing a ML tree by RAxML. Numbers on the nodes represent the support values from 200 bootstrap tests. *D. tumirostris* was used as the outgroup.

**a**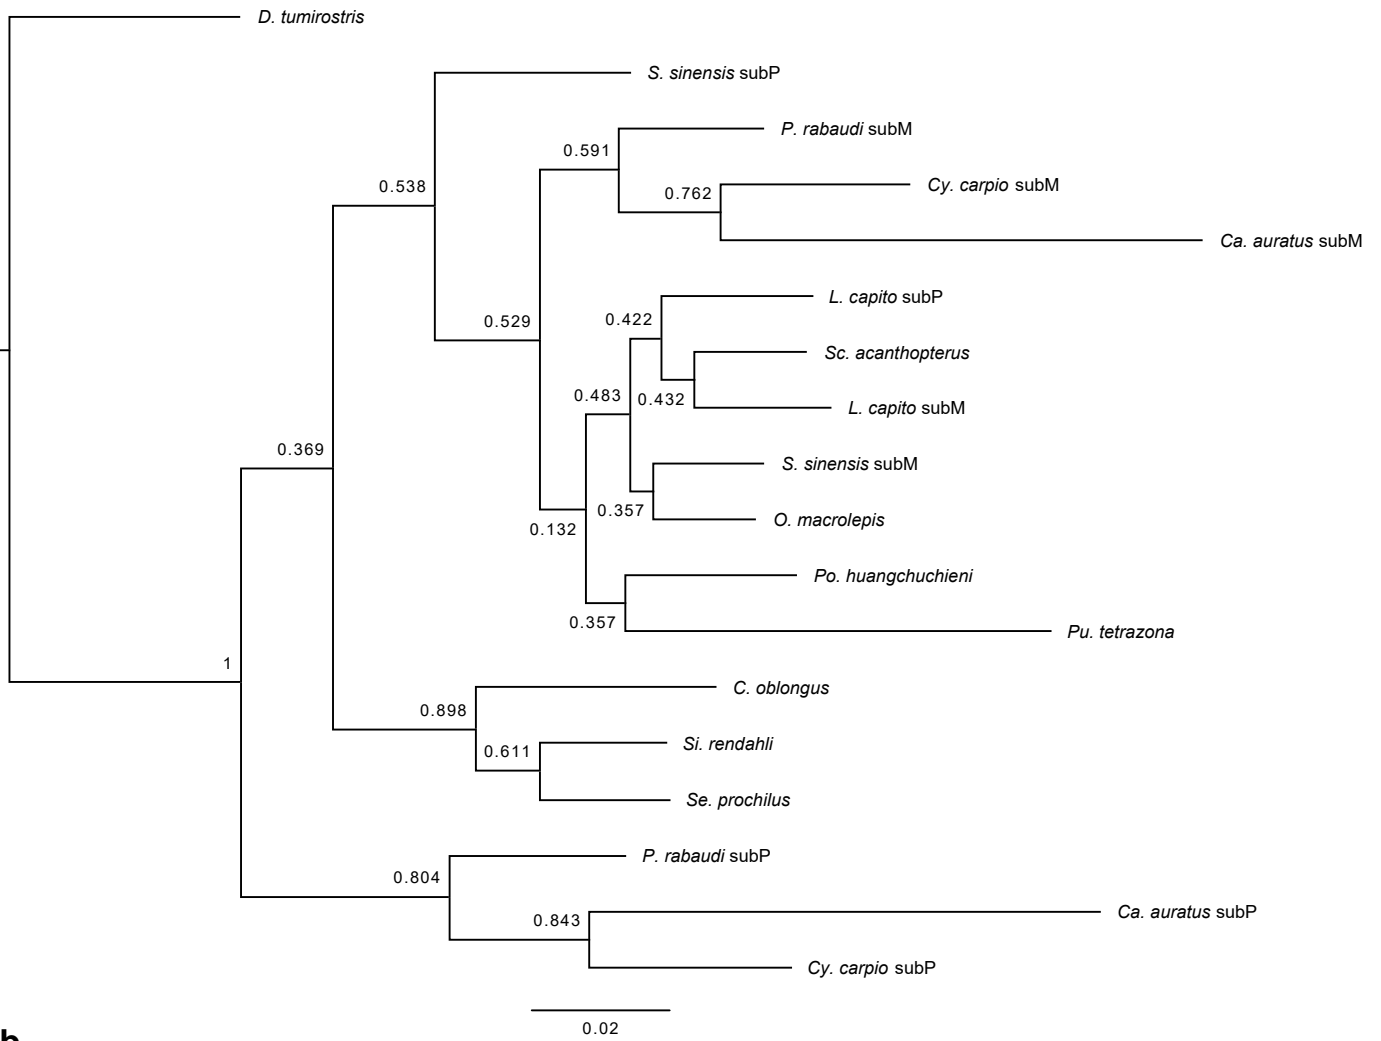**b**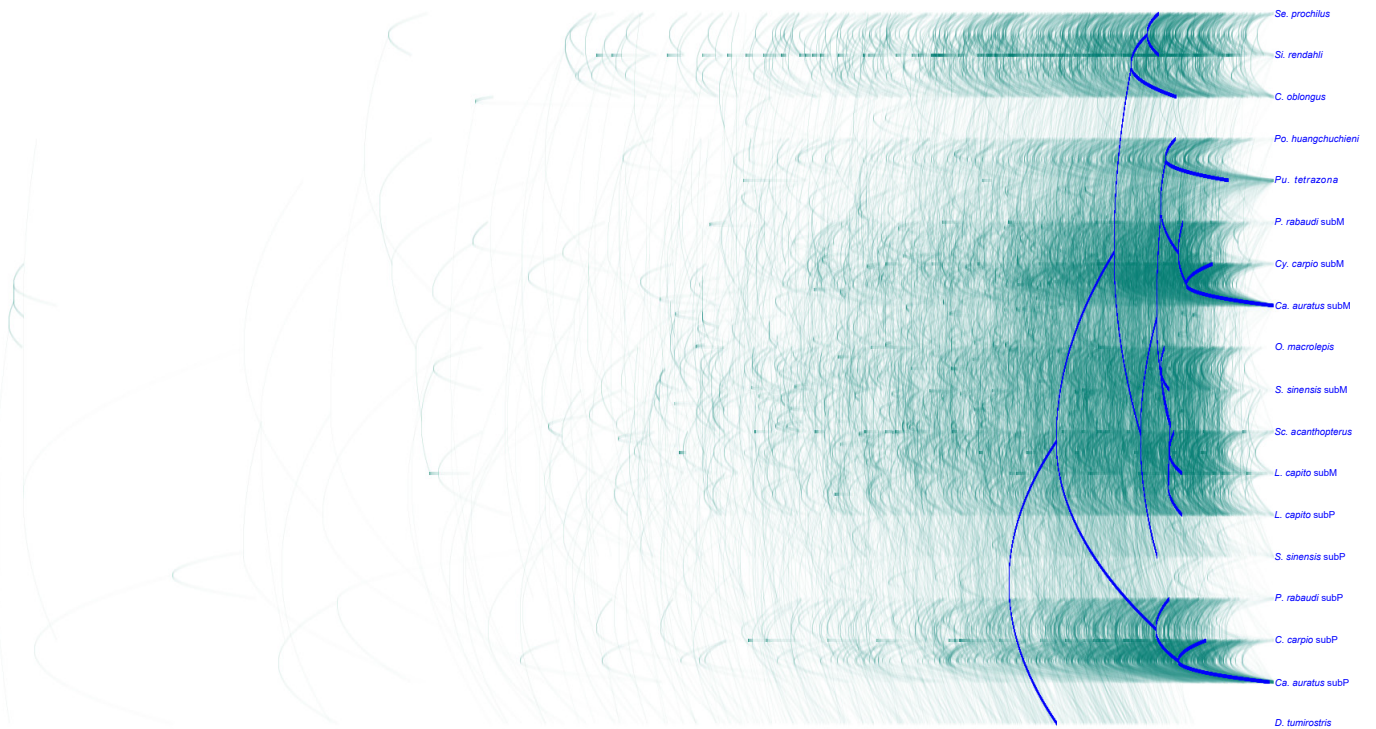

**Supplementary Fig. 18. a** Summary tree across 1665 genetrees, inferred by SumTrees. Values represent the degree of support for clades indicated as proportions (posterior probabilities). **b** DensiTree of 1665 genetrees, constructed using MUSCLE and RaxML-NG; green: consensus trees across multiple gene trees; blue: summary tree.

**Concatenation-based tree**

**Summary tree across 1665 genetrees**

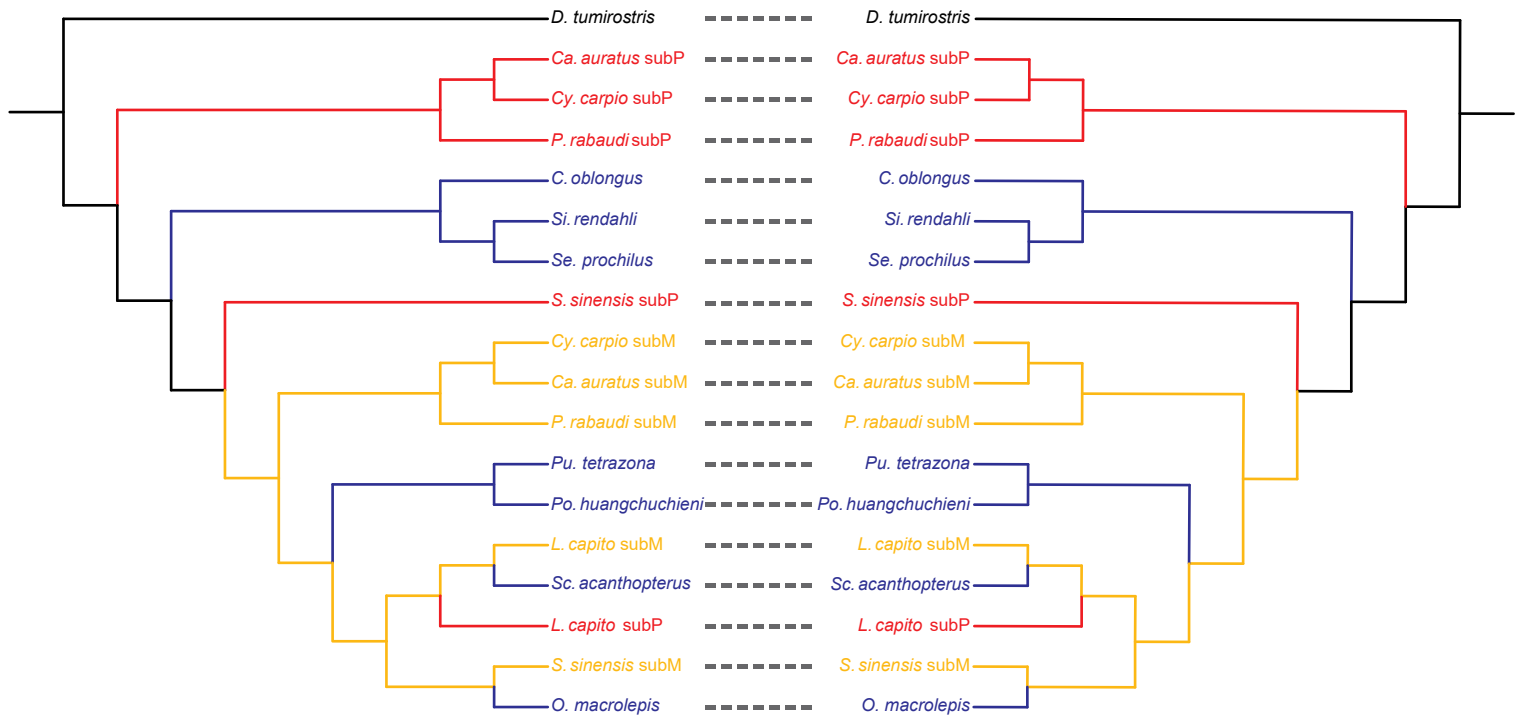

**Supplementary Fig. 19.** Congruences between concatenation-based tree (left) and summary tree across 1665 genetrees (right).

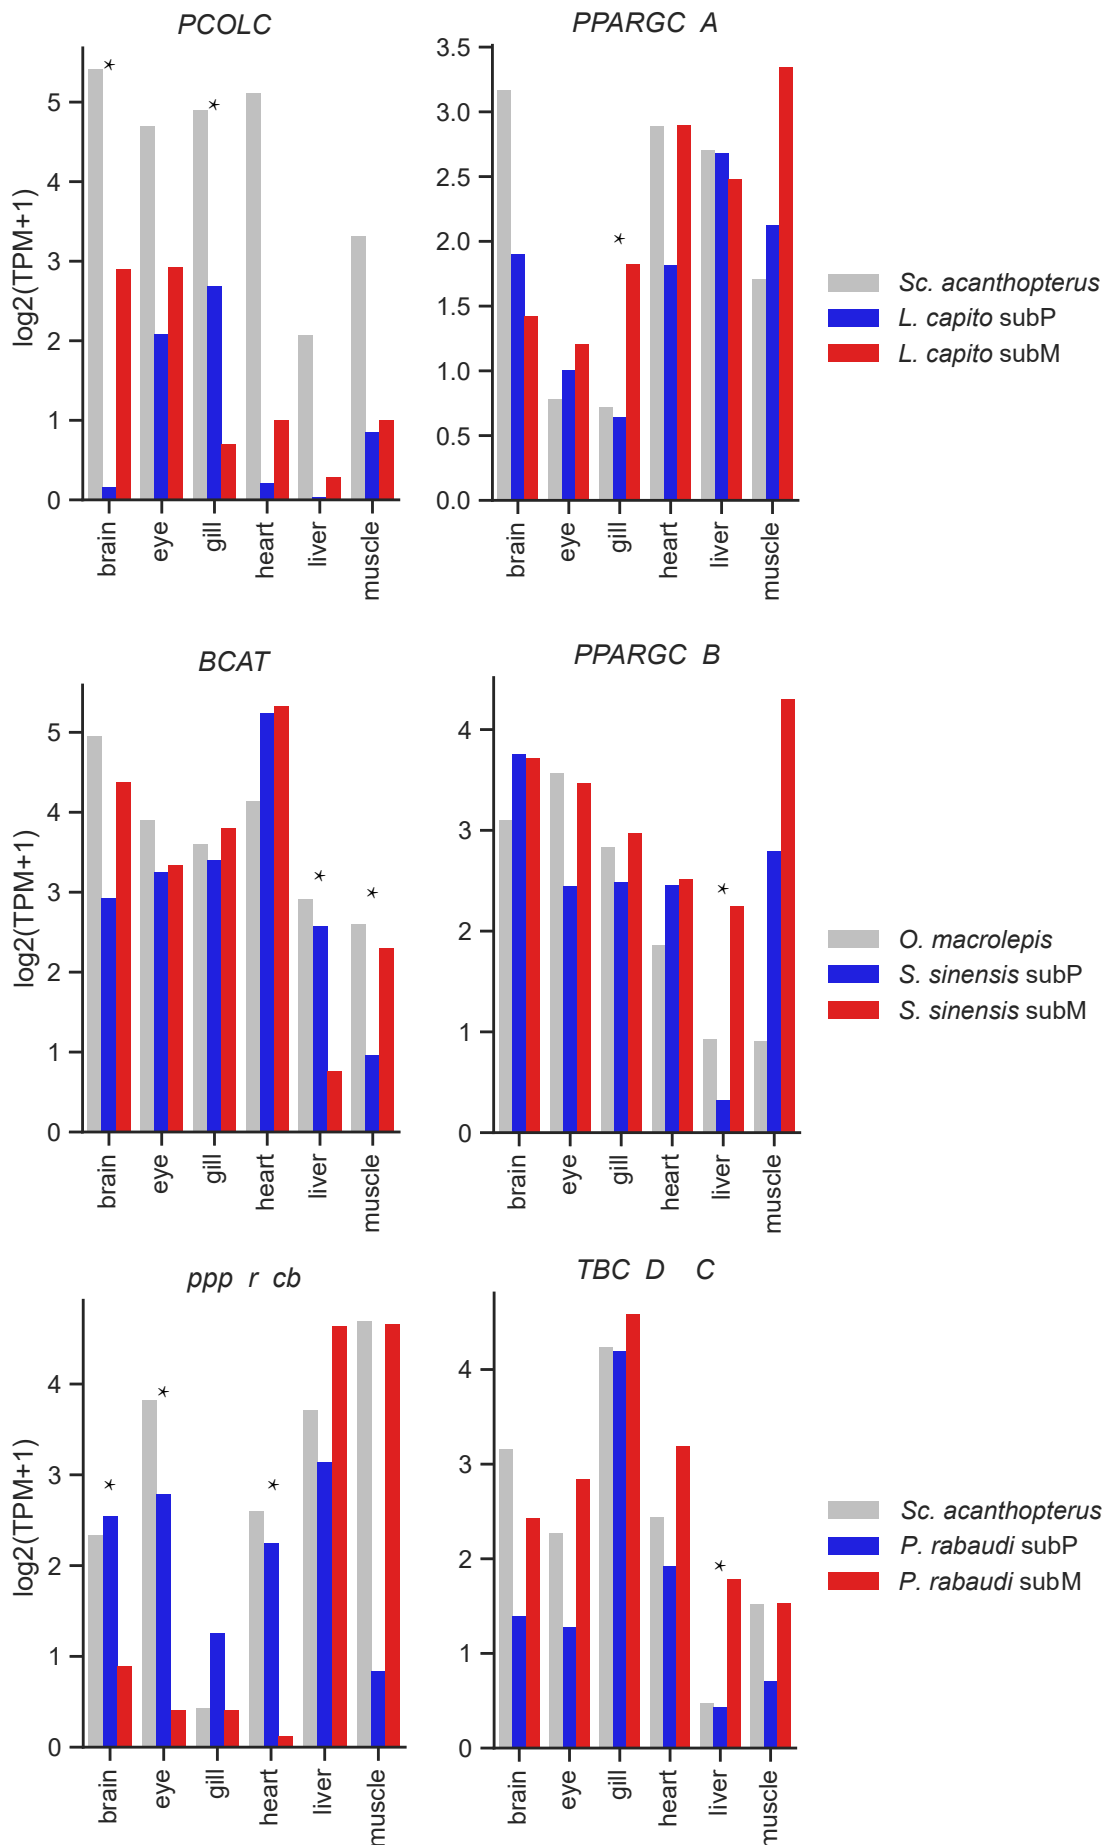

**Supplementary Fig. 20.** Examples of expression of sub-F (left) and neo-F (right) genes. Gray bar, *Sc. acanthopterus* or *O. macrolepis*; blue bar, subP of each allotetraploid; red bar, subM of each allotetraploid. Tissues related with sub-F or neo-F were showed using asterisks.

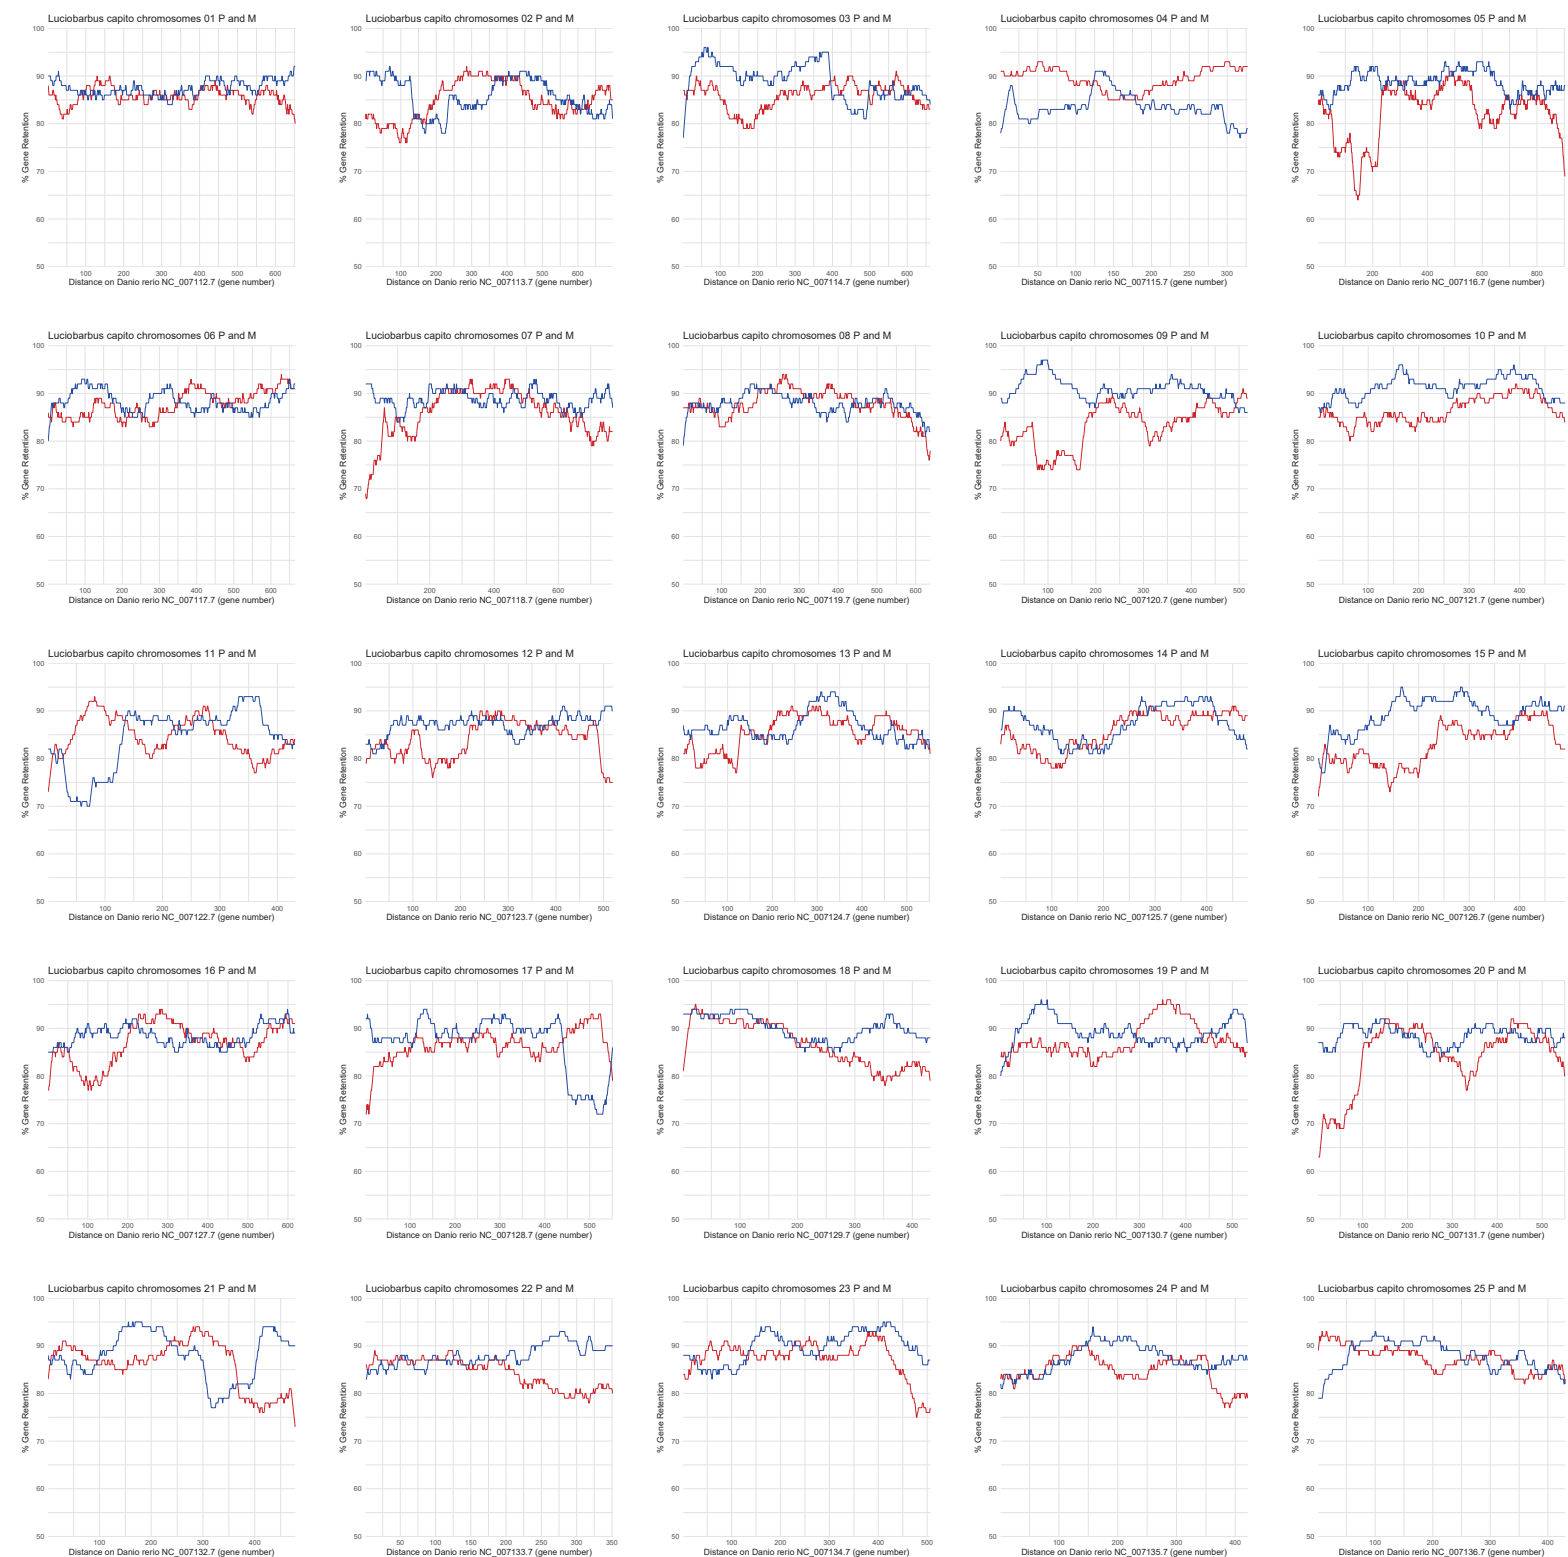

**Supplementary Fig. 21.** Subgenome fractionation of *L. capito* chromosomes relative to the diploid *Danio rerio*. Gene retention in *L. capito* subP (red) and subM (blue) was calculated in 100 gene sliding windows for each chromosome of the *D. rerio* reference.



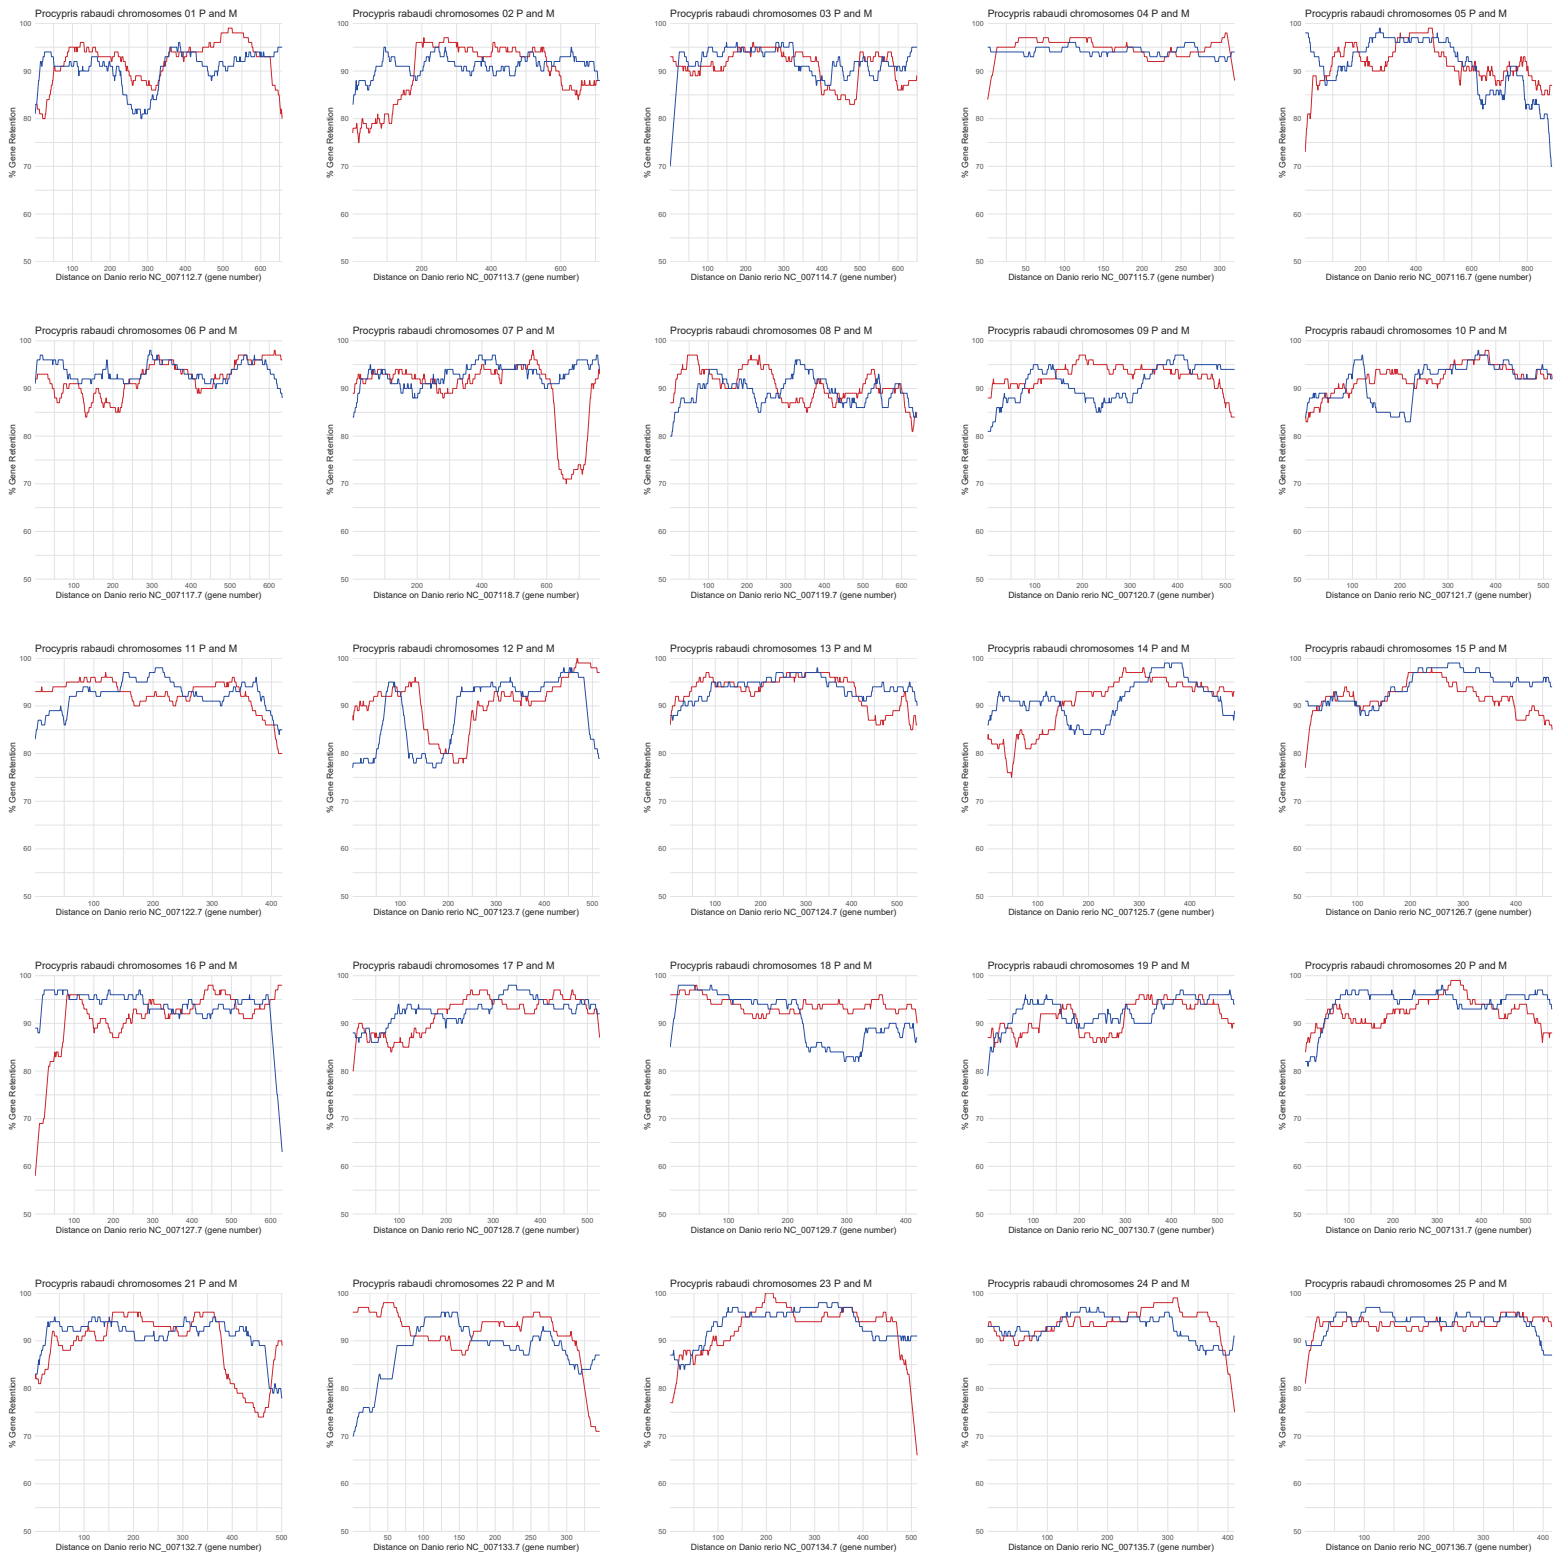

**Supplementary Fig. 22.** Subgenome fractionation of *P. rabaudi* chromosomes relative to the diploid *D. rerio*. Gene retention in *P. rabaudi* subP (red) and subM (blue) was calculated in 100 gene sliding windows for each chromosome of the *D. rerio* reference.

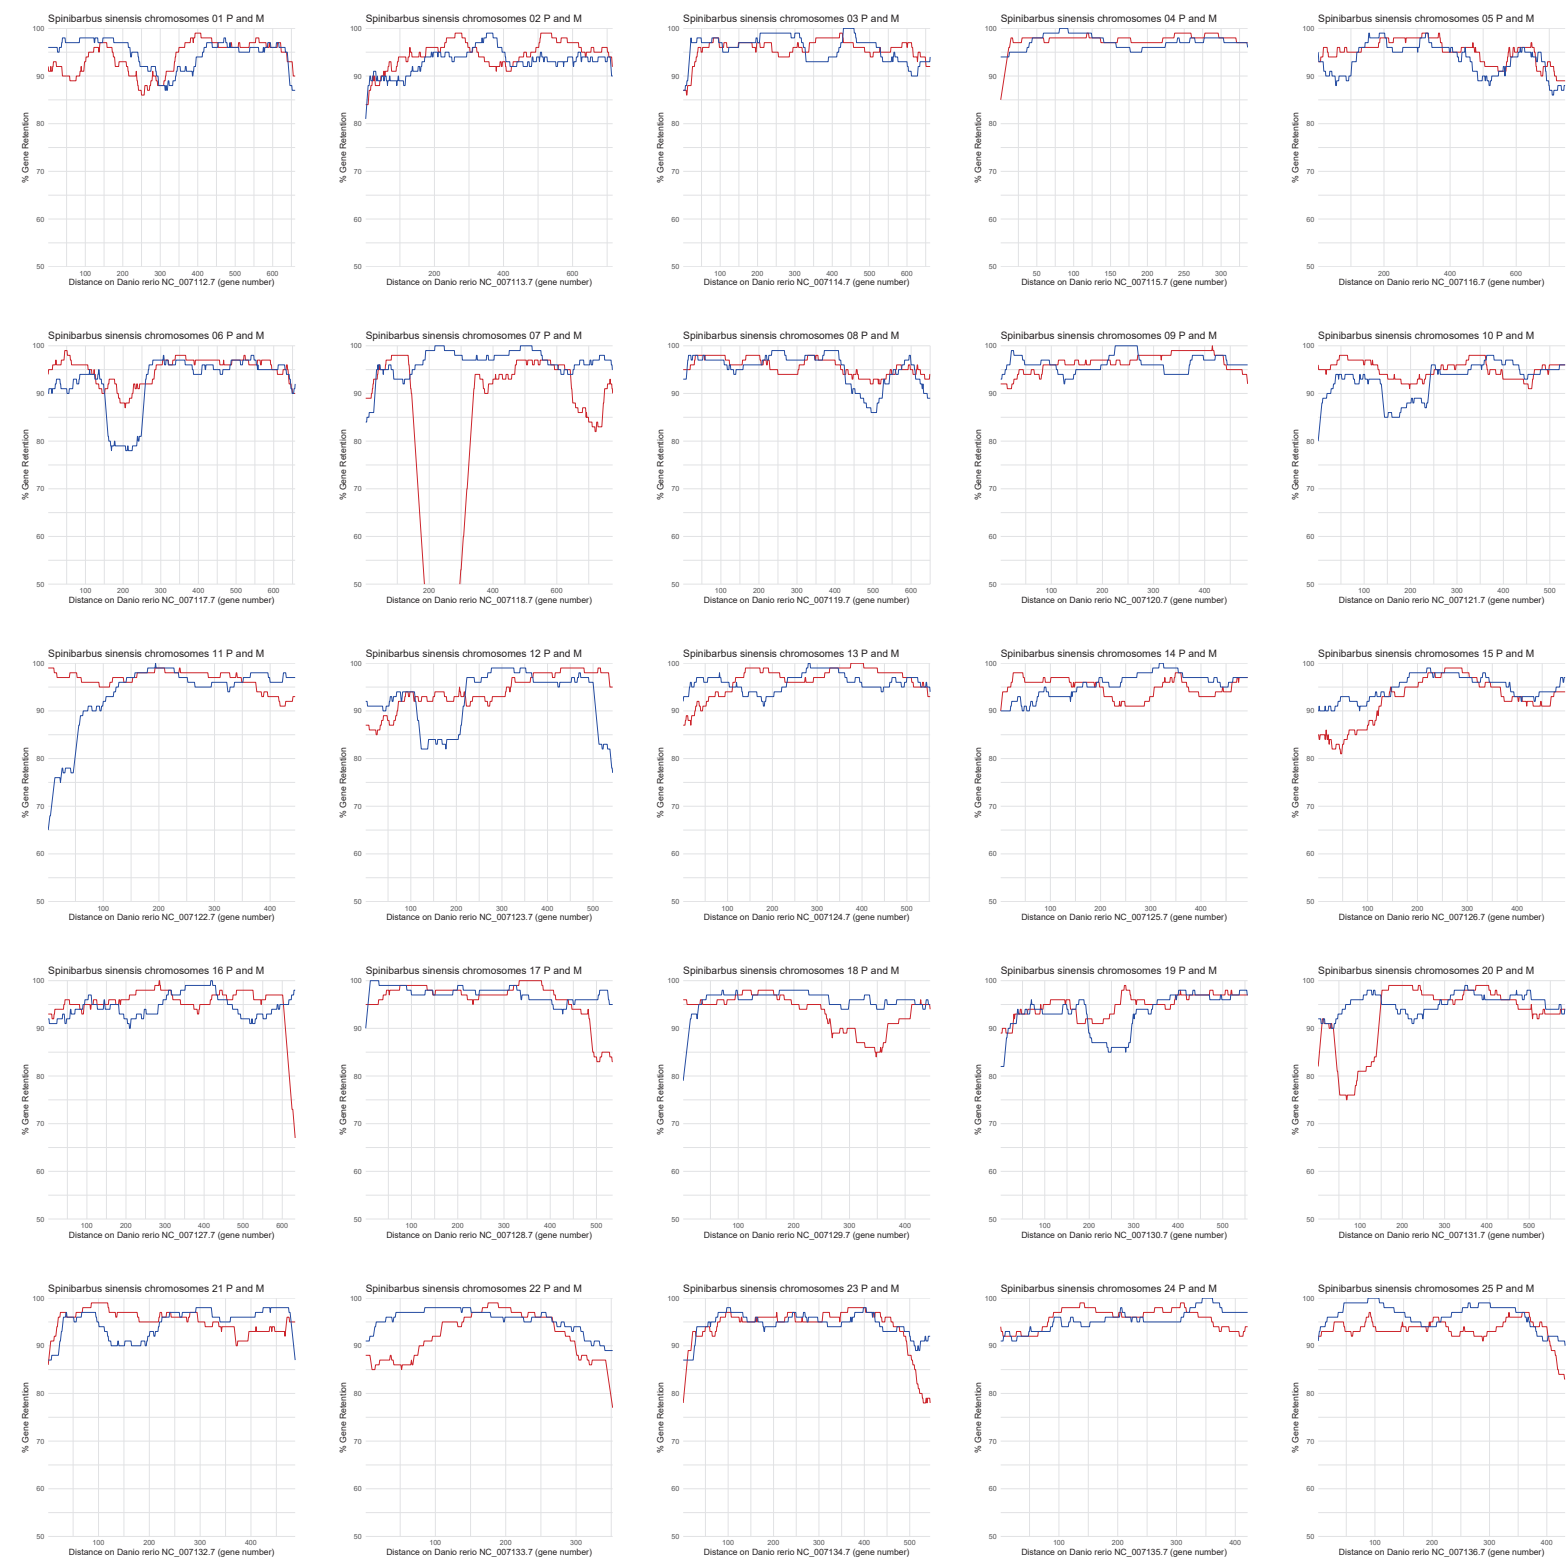

**Supplementary Fig. 23.** Subgenome fractionation of *S. sinensis* chromosomes relative to the diploid *D. rerio*. Gene retention in *S. sinensis* subP (red) and subM (blue) was calculated in 100 gene sliding windows for each chromosome of the *D. rerio* reference.

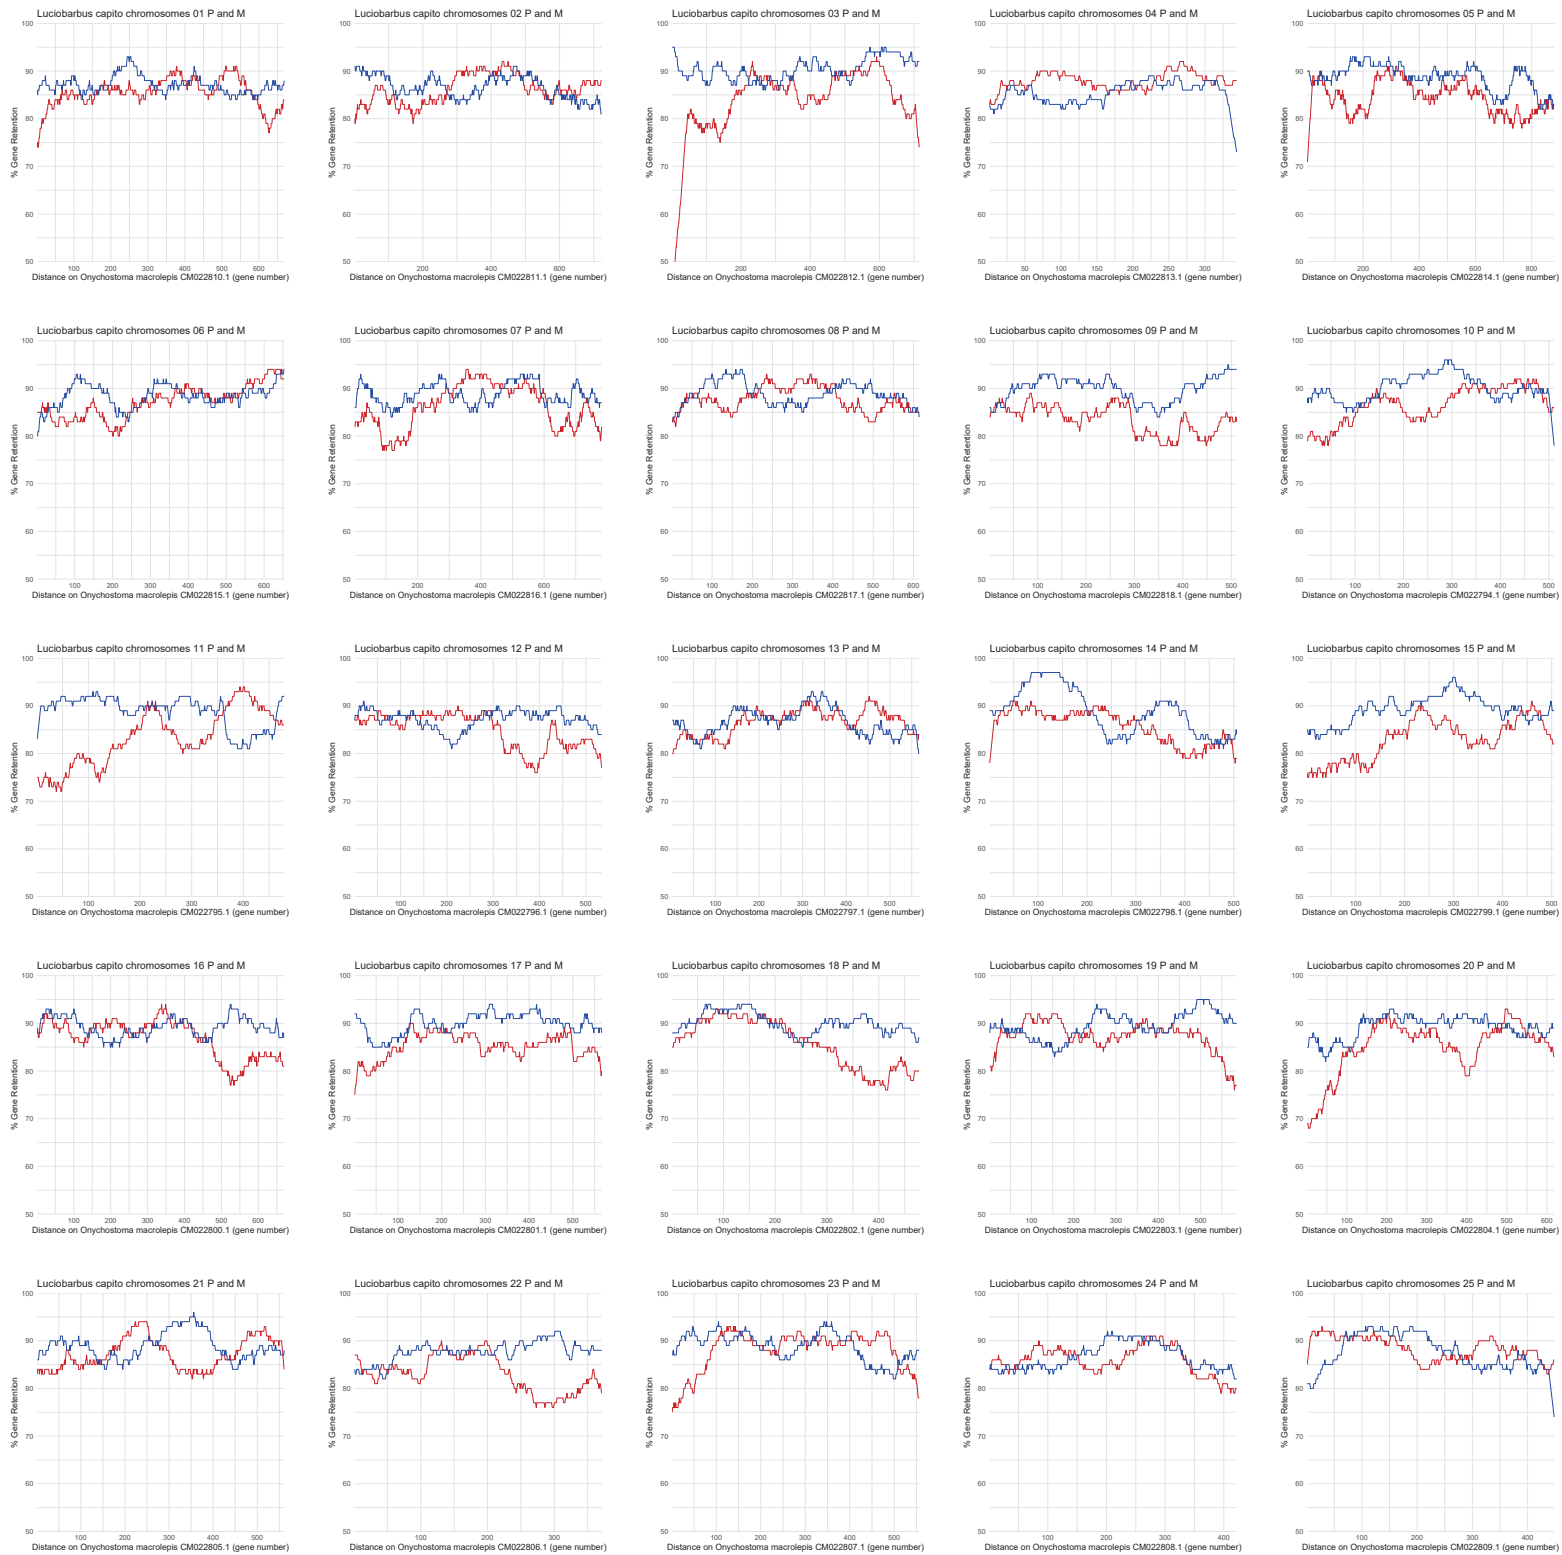

**Supplementary Fig. 24.** Subgenome fractionation of *L. capito* chromosomes relative to the diploid *O. macrolepis*. Gene retention in *L. capito* subP (red) and subM (blue) was calculated in 100 gene sliding windows for each chromosome of the *O. macrolepis* reference.

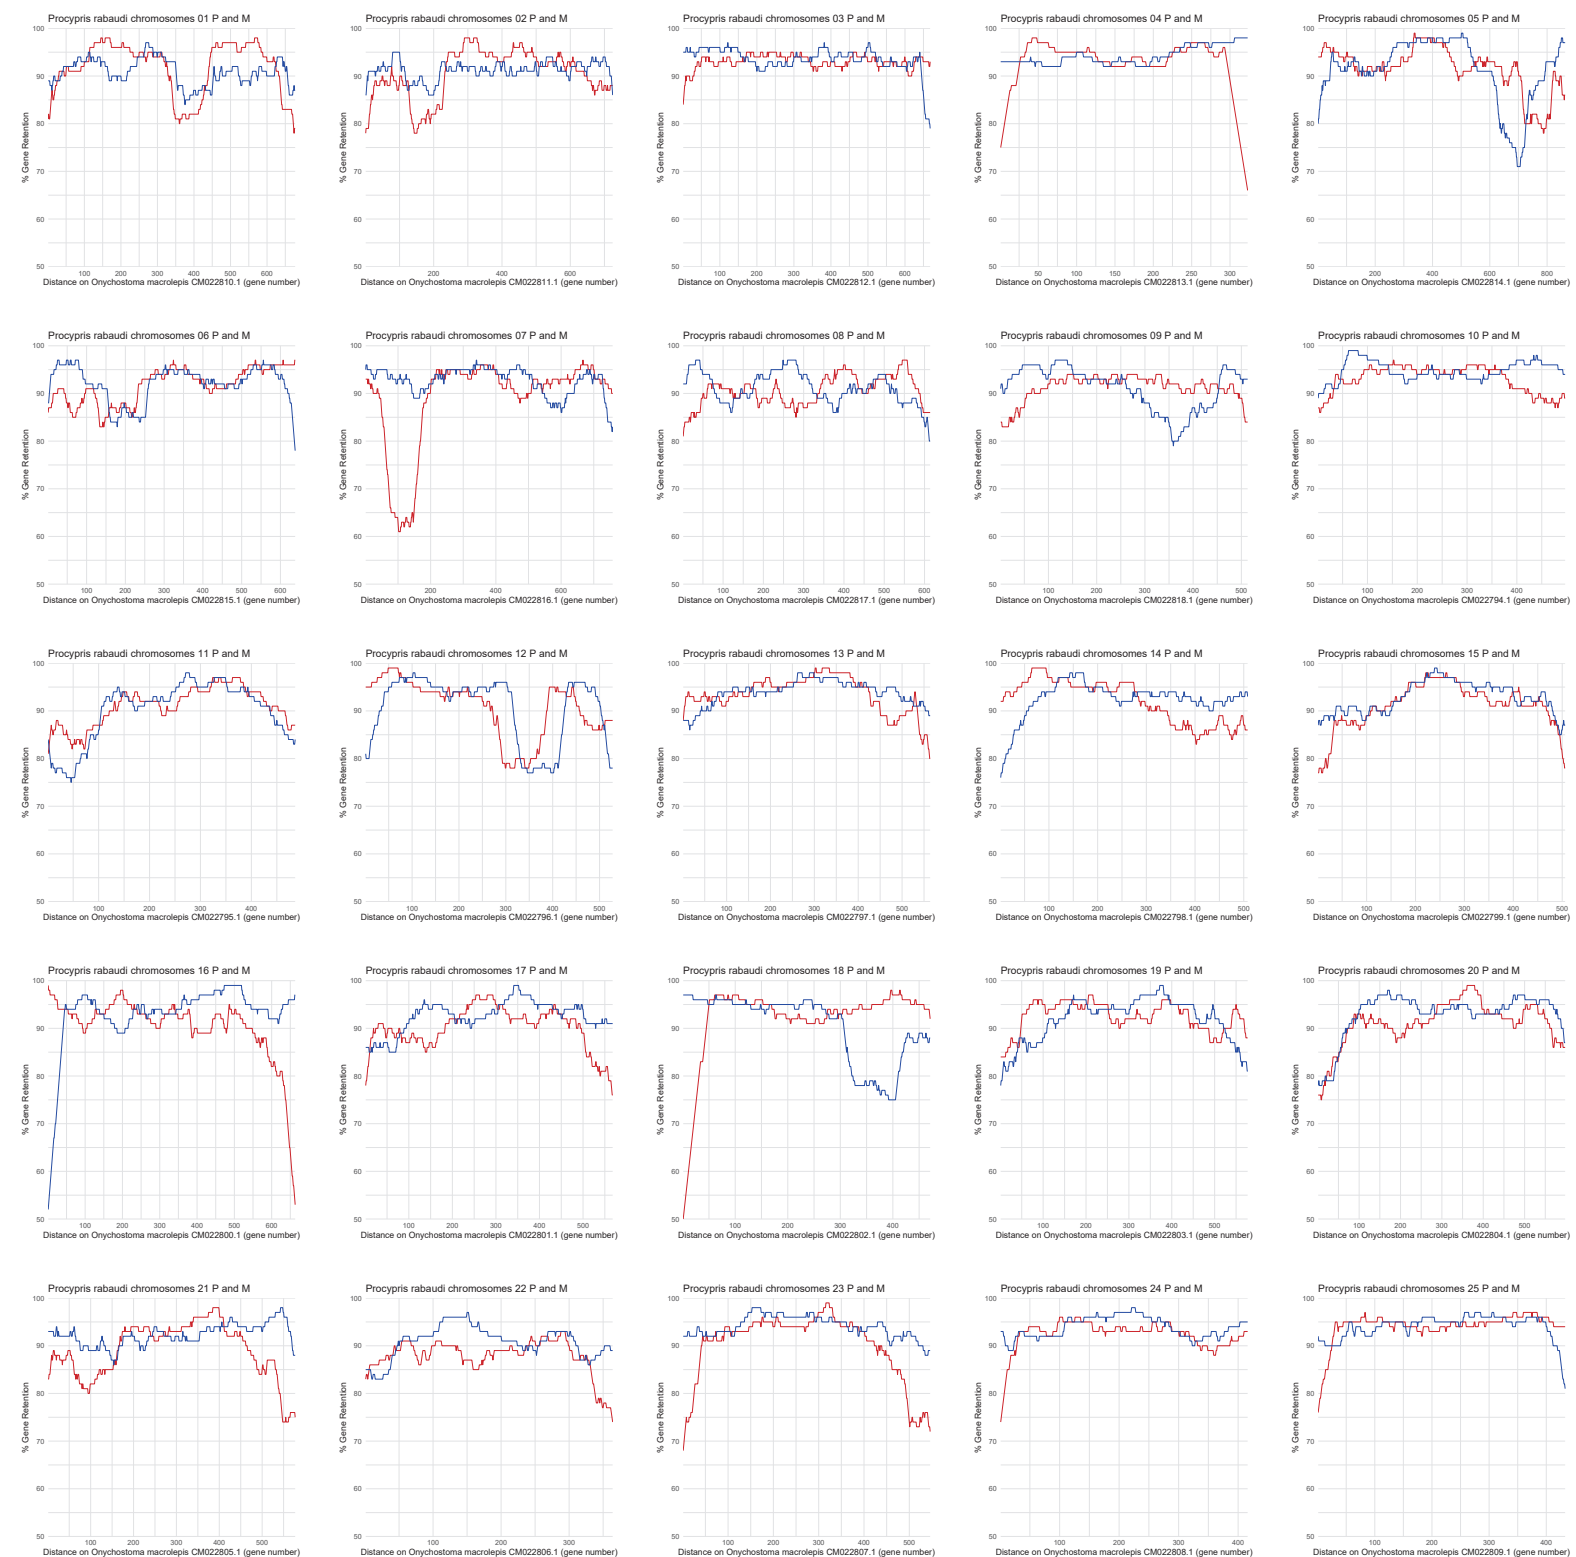

**Supplementary Fig. 25.** Subgenome fractionation of *P. rabaudi* chromosomes relative to the diploid *O. macrolepis*. Gene retention in *P. rabaudi* subP (red) and subM (blue) was calculated in 100 gene sliding windows for each chromosome of the *O. macrolepis* reference.

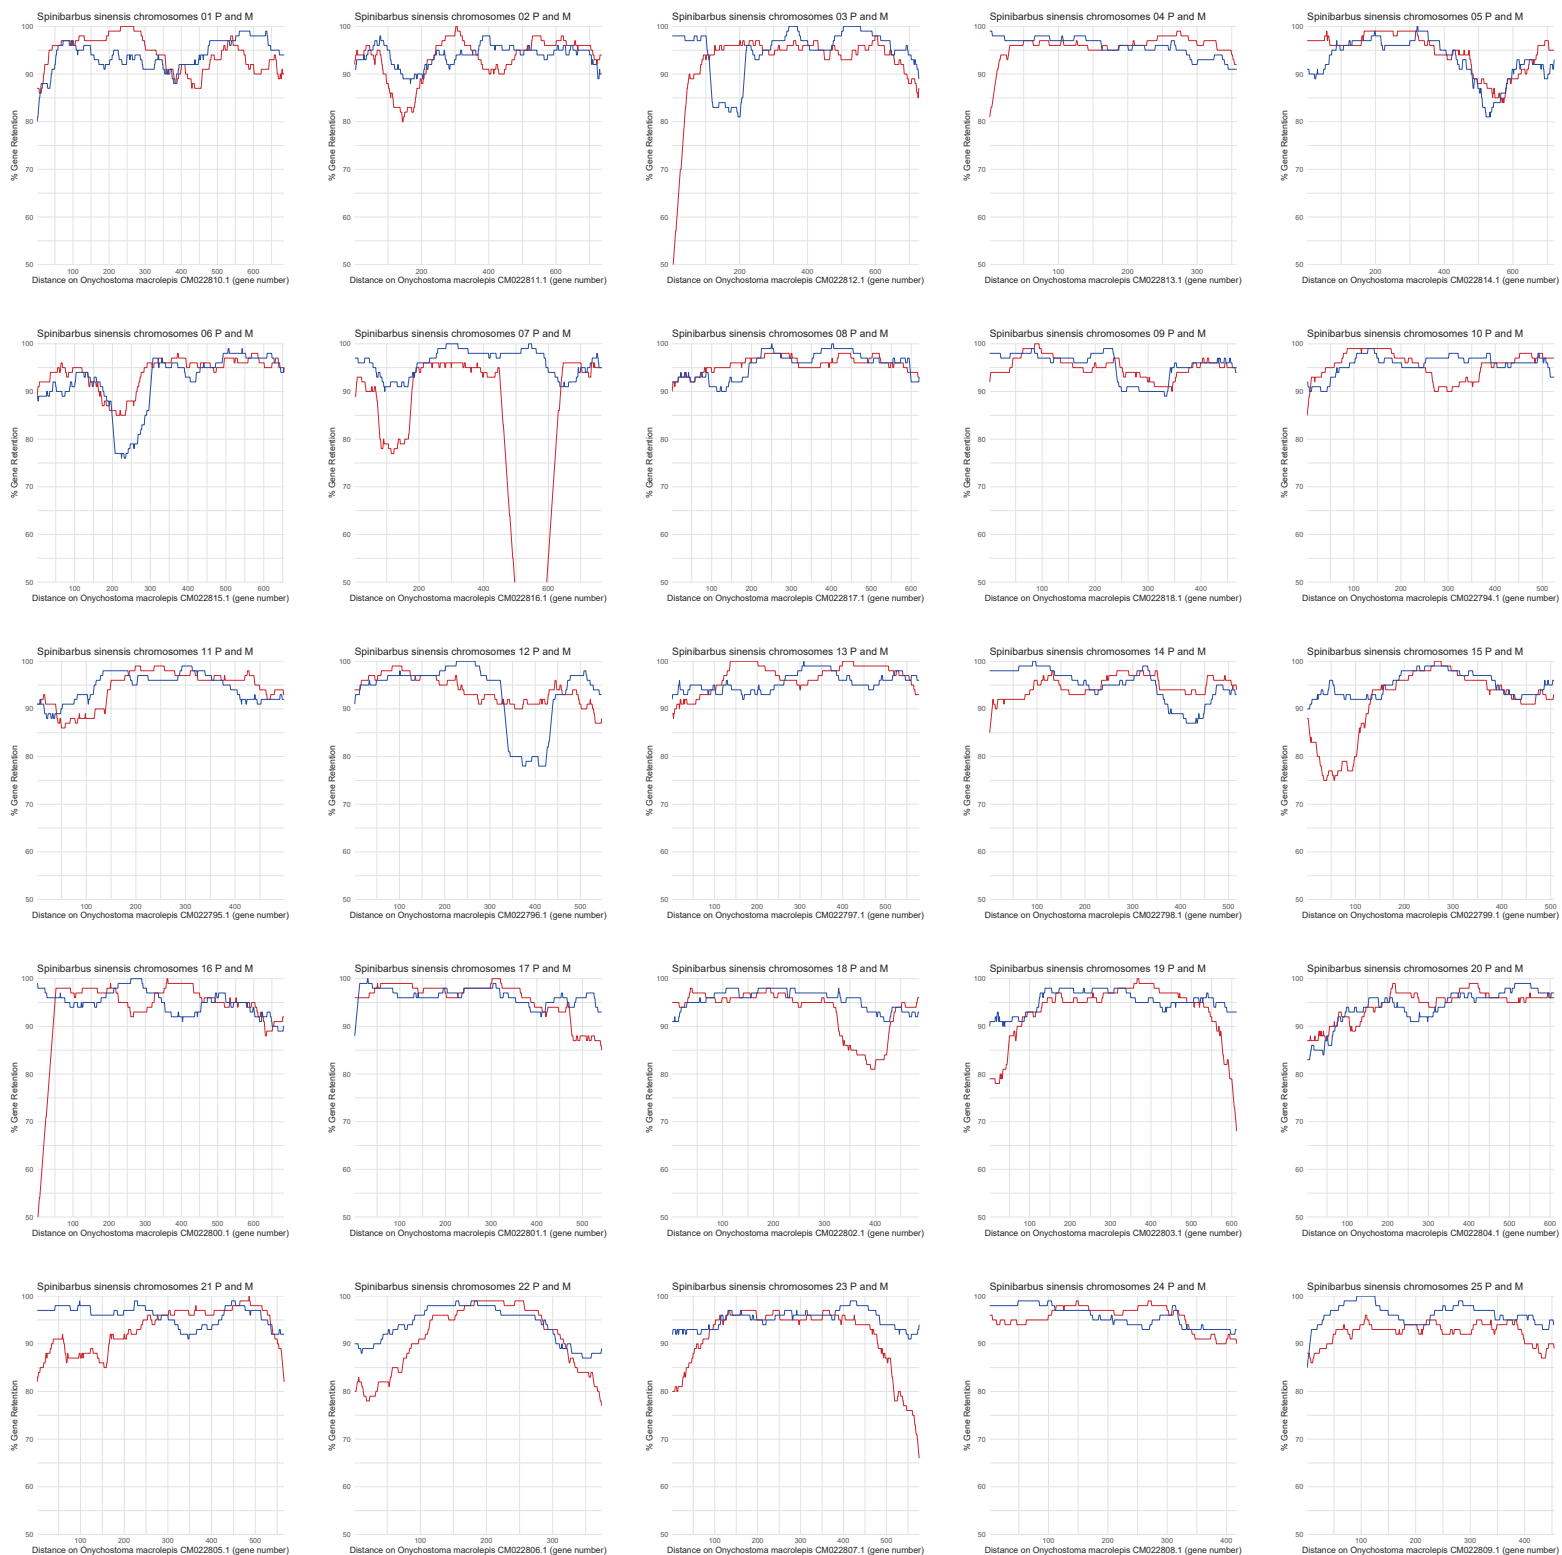

**Supplementary Fig. 26.** Subgenome fractionation of *S. sinensis* chromosomes relative to the diploid *O. macrolepis*. Gene retention in *S. sinensis* subP (red) and subM (blue) was calculated in 100 gene sliding windows for each chromosome of the *O. macrolepis* reference.

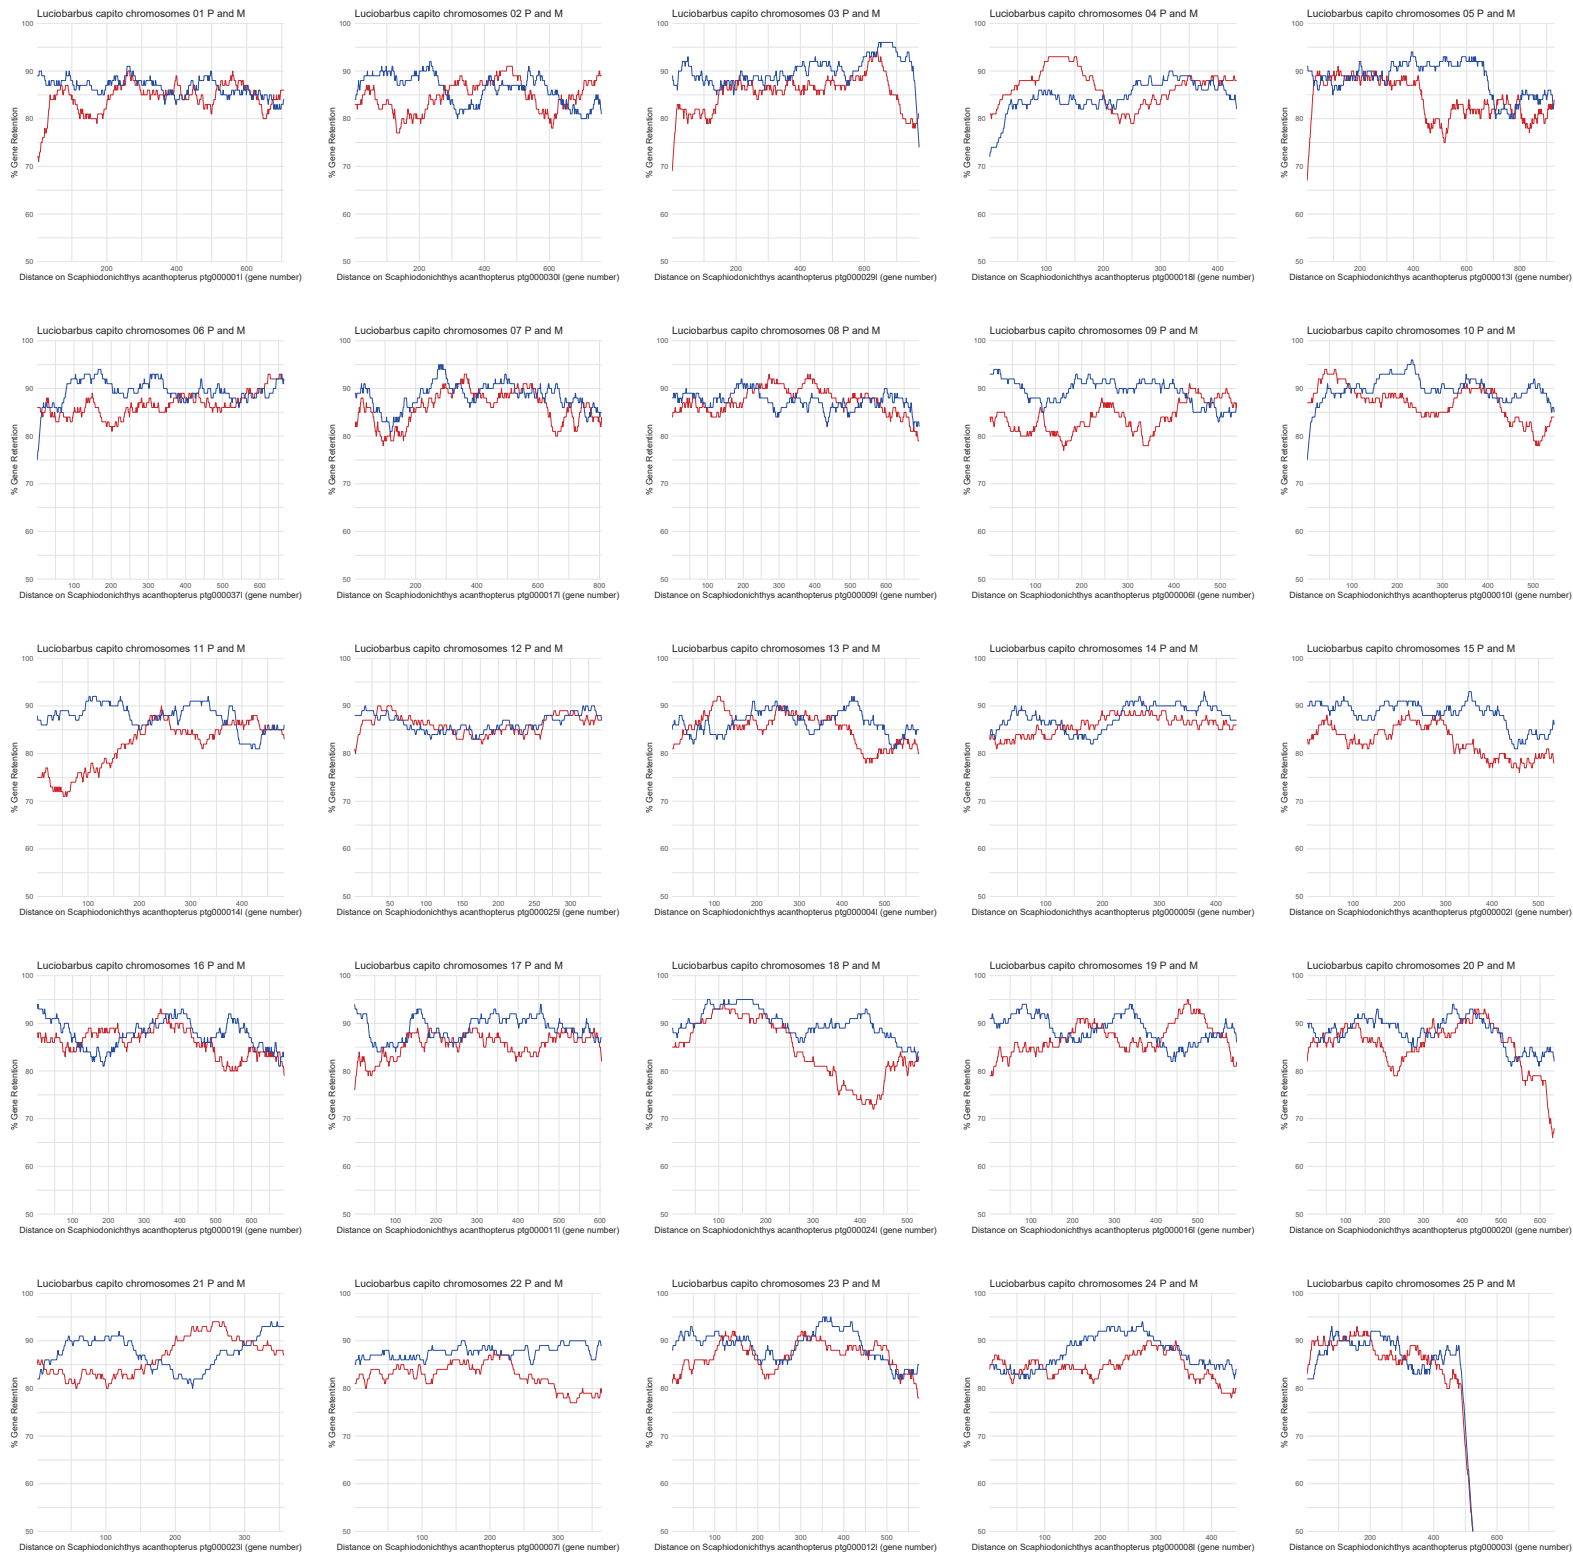

**Supplementary Fig. 27.** Subgenome fractionation of *L. capito* chromosomes relative to the diploid *Sc. acanthopterus*. Gene retention in *L. capito* subP (red) and subM (blue) was calculated in 100 gene sliding windows for each chromosome of the *Sc. acanthopterus* reference.

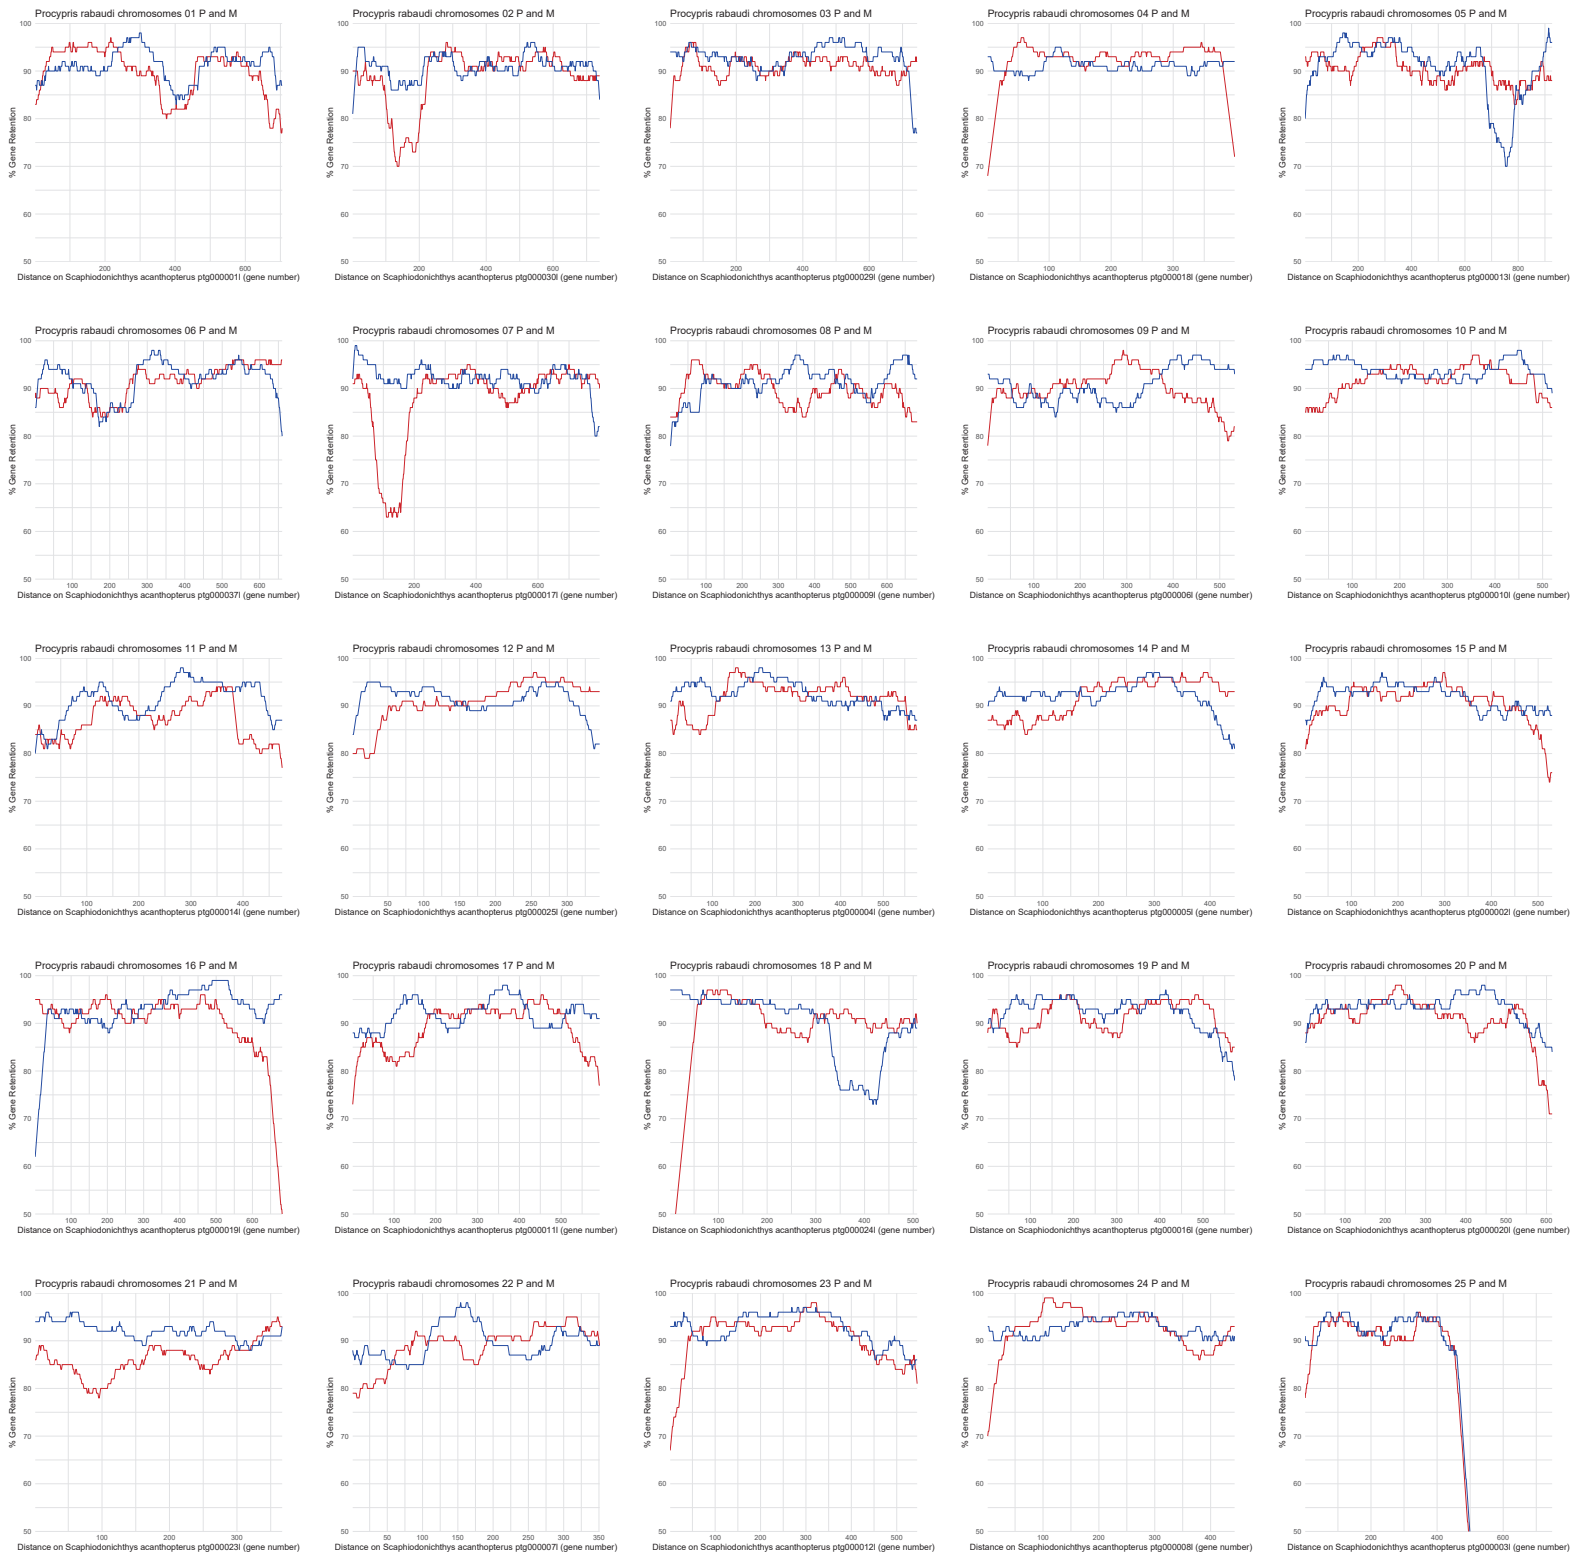

**Supplementary Fig. 28.** Subgenome fractionation of *P. rabaudi* chromosomes relative to the diploid *Sc. acanthopterus*. Gene retention in *P. rabaudi* subP (red) and subM (blue) was calculated in 100 gene sliding windows for each chromosome of the *Sc. acanthopterus* reference.

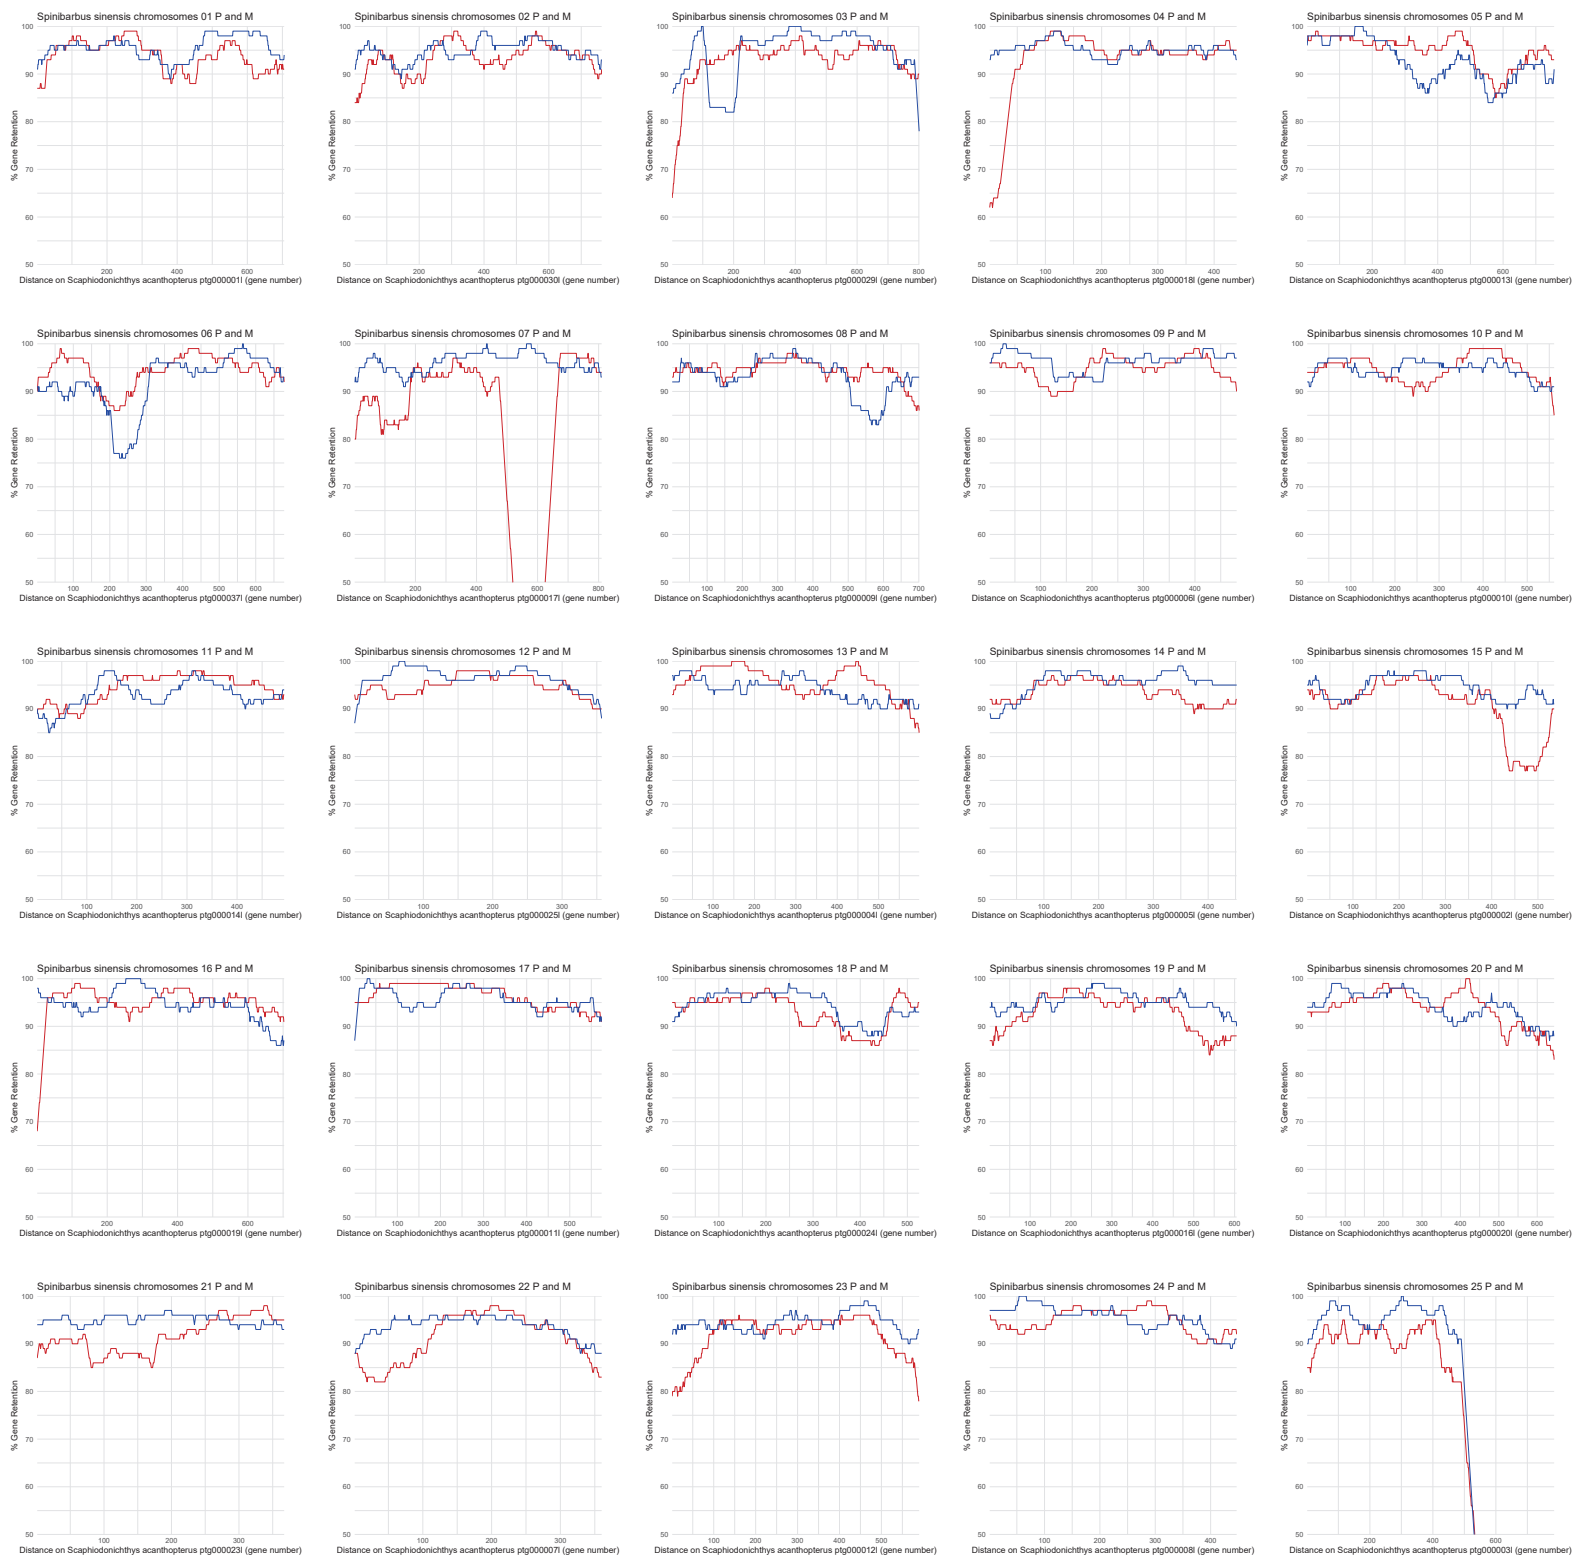

**Supplementary Fig. 29.** Subgenome fractionation of *S. sinensis* chromosomes relative to the diploid *Sc. acanthopterus*. Gene retention in *S. sinensis* subP (red) and subM (blue) was calculated in 100 gene sliding windows for each chromosome of the *Sc. acanthopterus* reference.



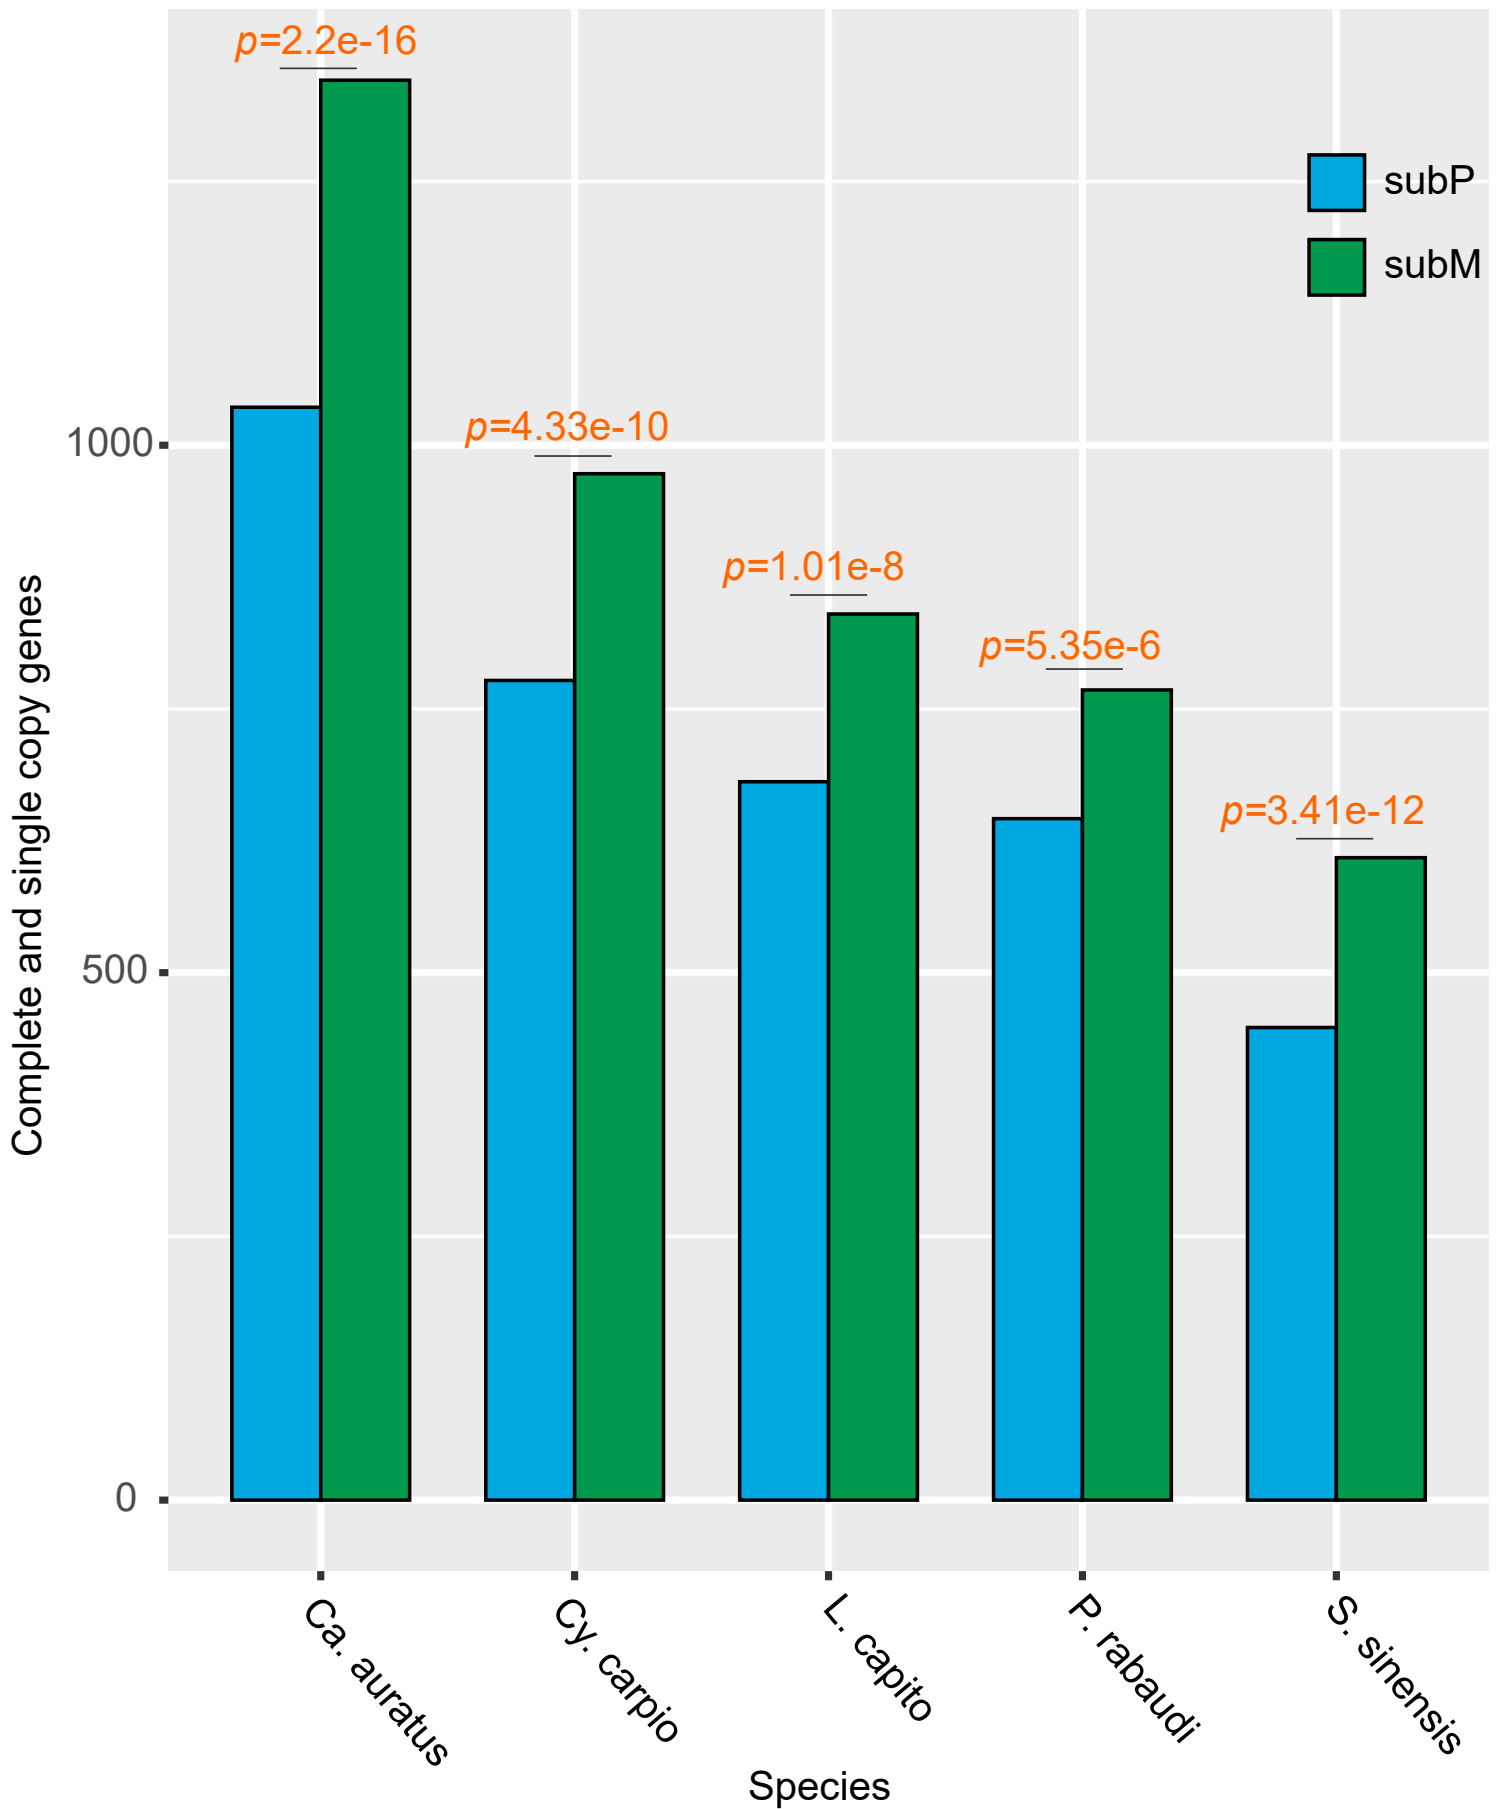

**Supplementary Fig. 30.** Biased distribution of complete and single copy genes generated by the BUSCO analysis in the subM of five allotetraploids ( $X^2$  test;  $p$ -value $\leq 5.35e-6$ ).

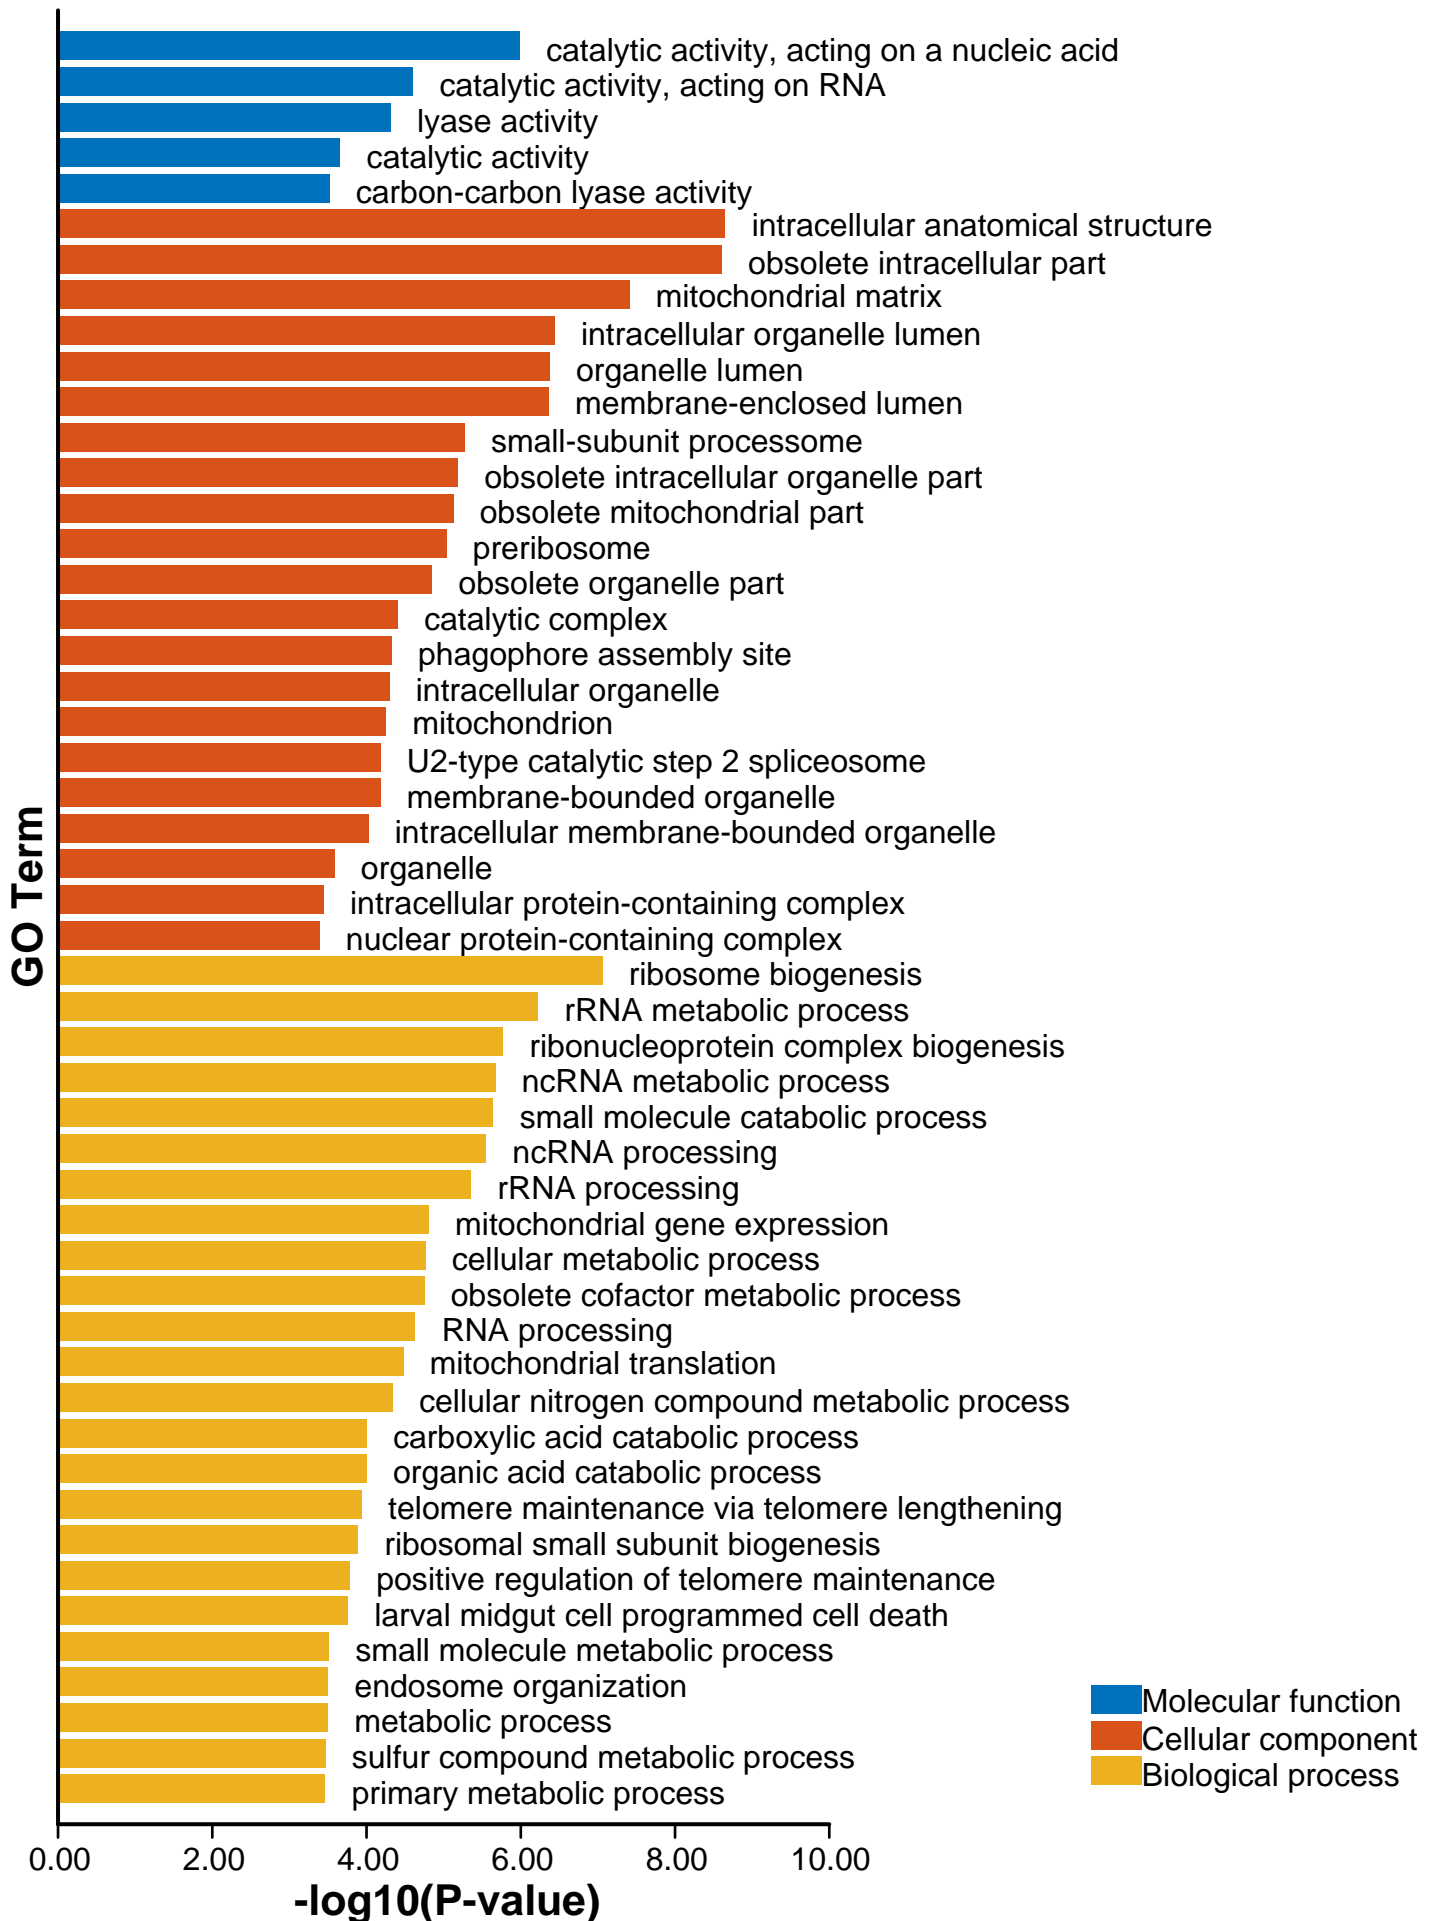

**Supplementary Fig. 31.** GO enrichment analysis of the complete and single copy BUSCO genes in the subP of *S. sinensis*.

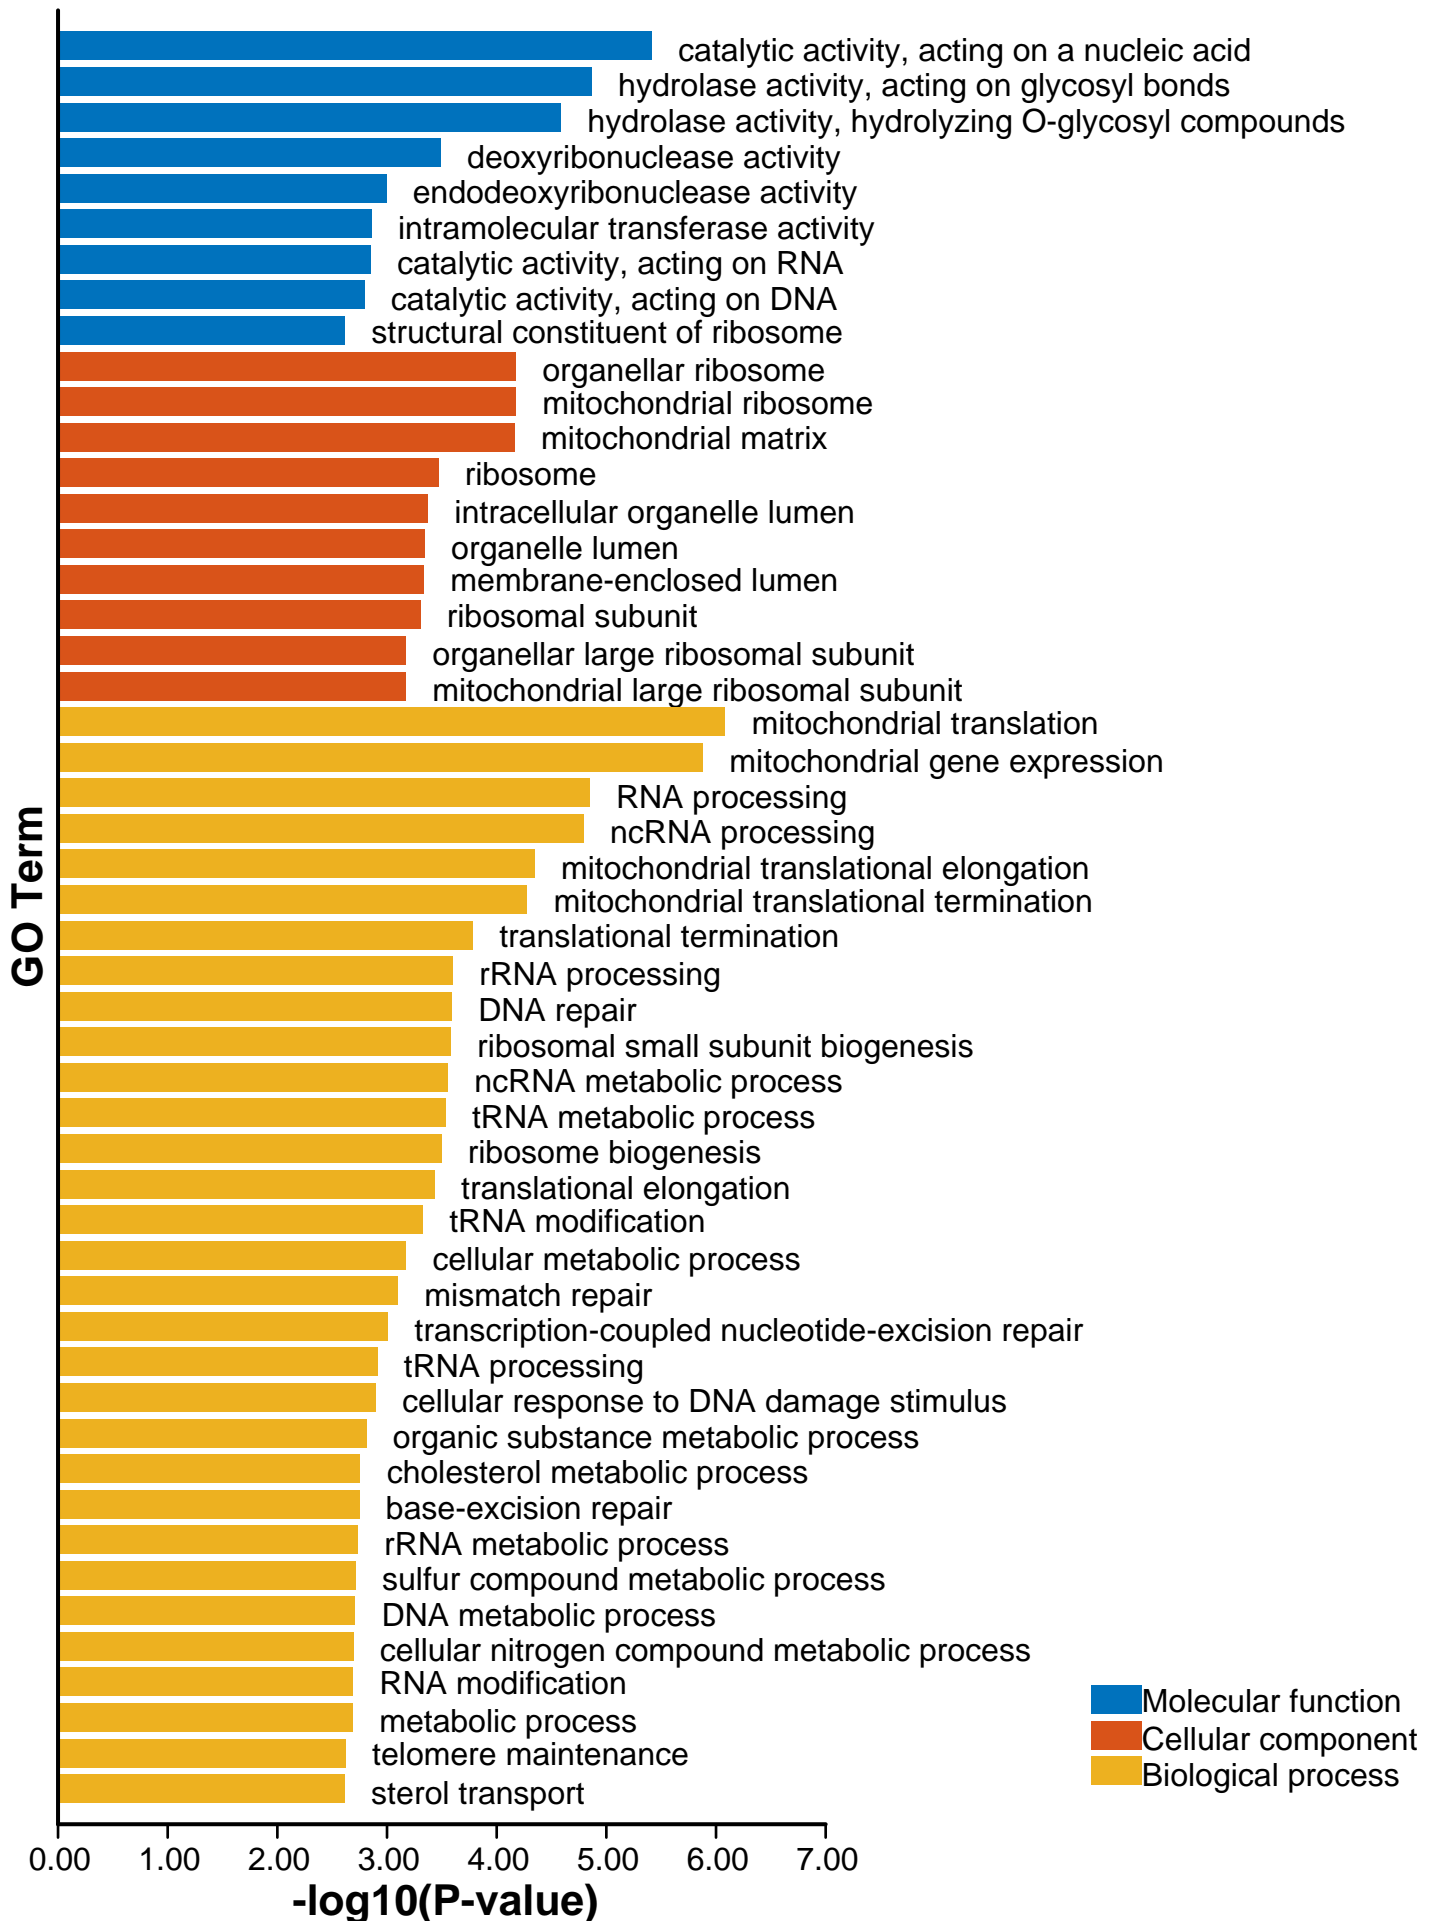

**Supplementary Fig. 32.** GO enrichment analysis of the complete and single copy BUSCO genes in the subM of *S. sinensis*.

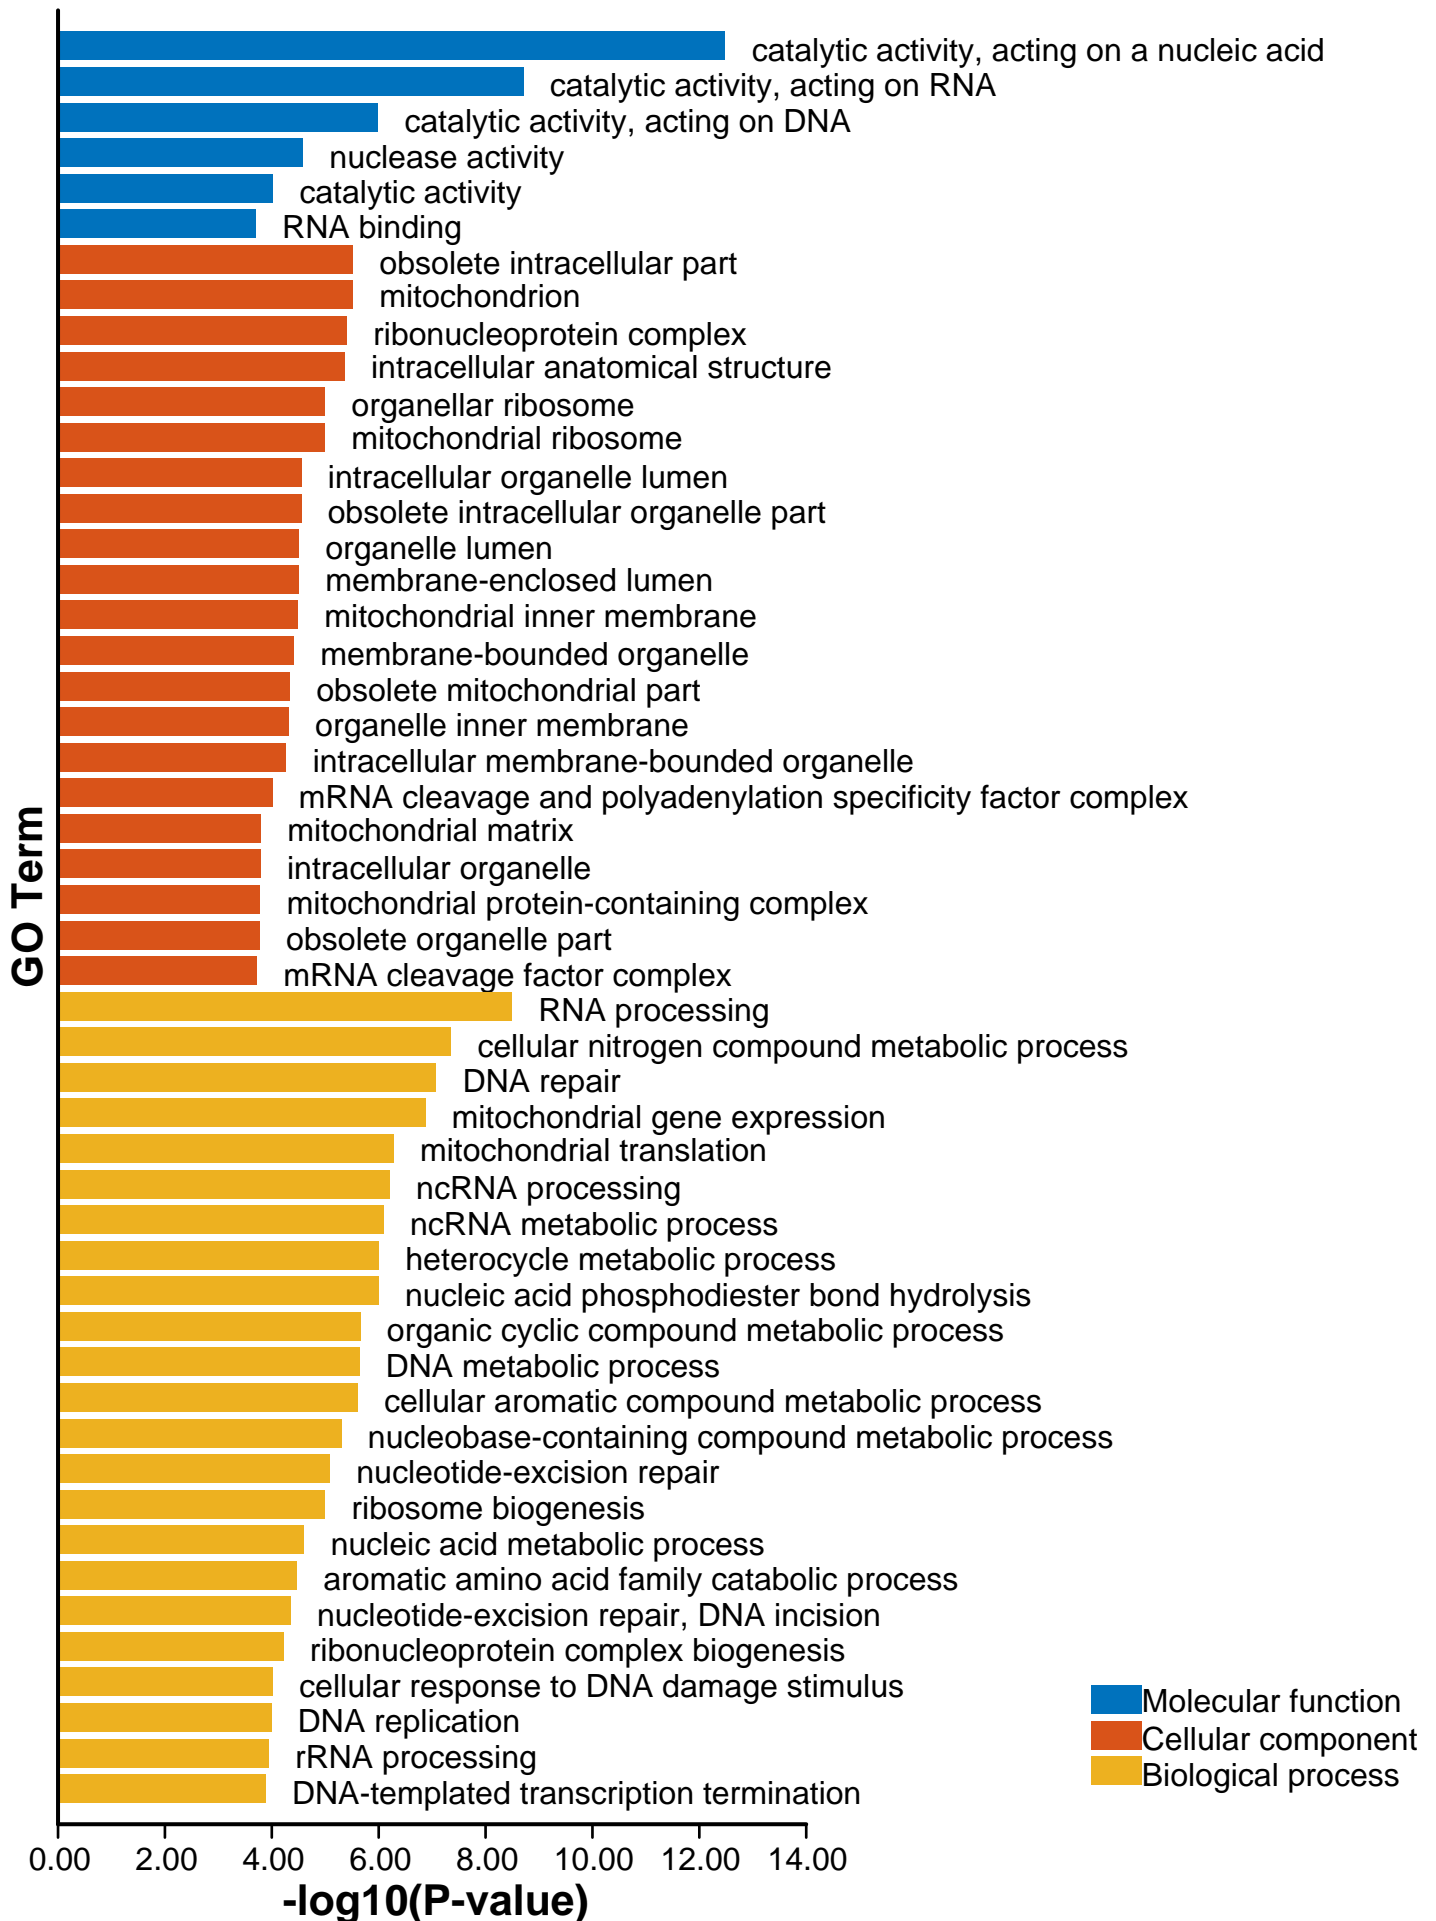

**Supplementary Fig. 33.** GO enrichment analysis of the complete and single copy BUSCO genes in the subP of *P. rabaudi*.

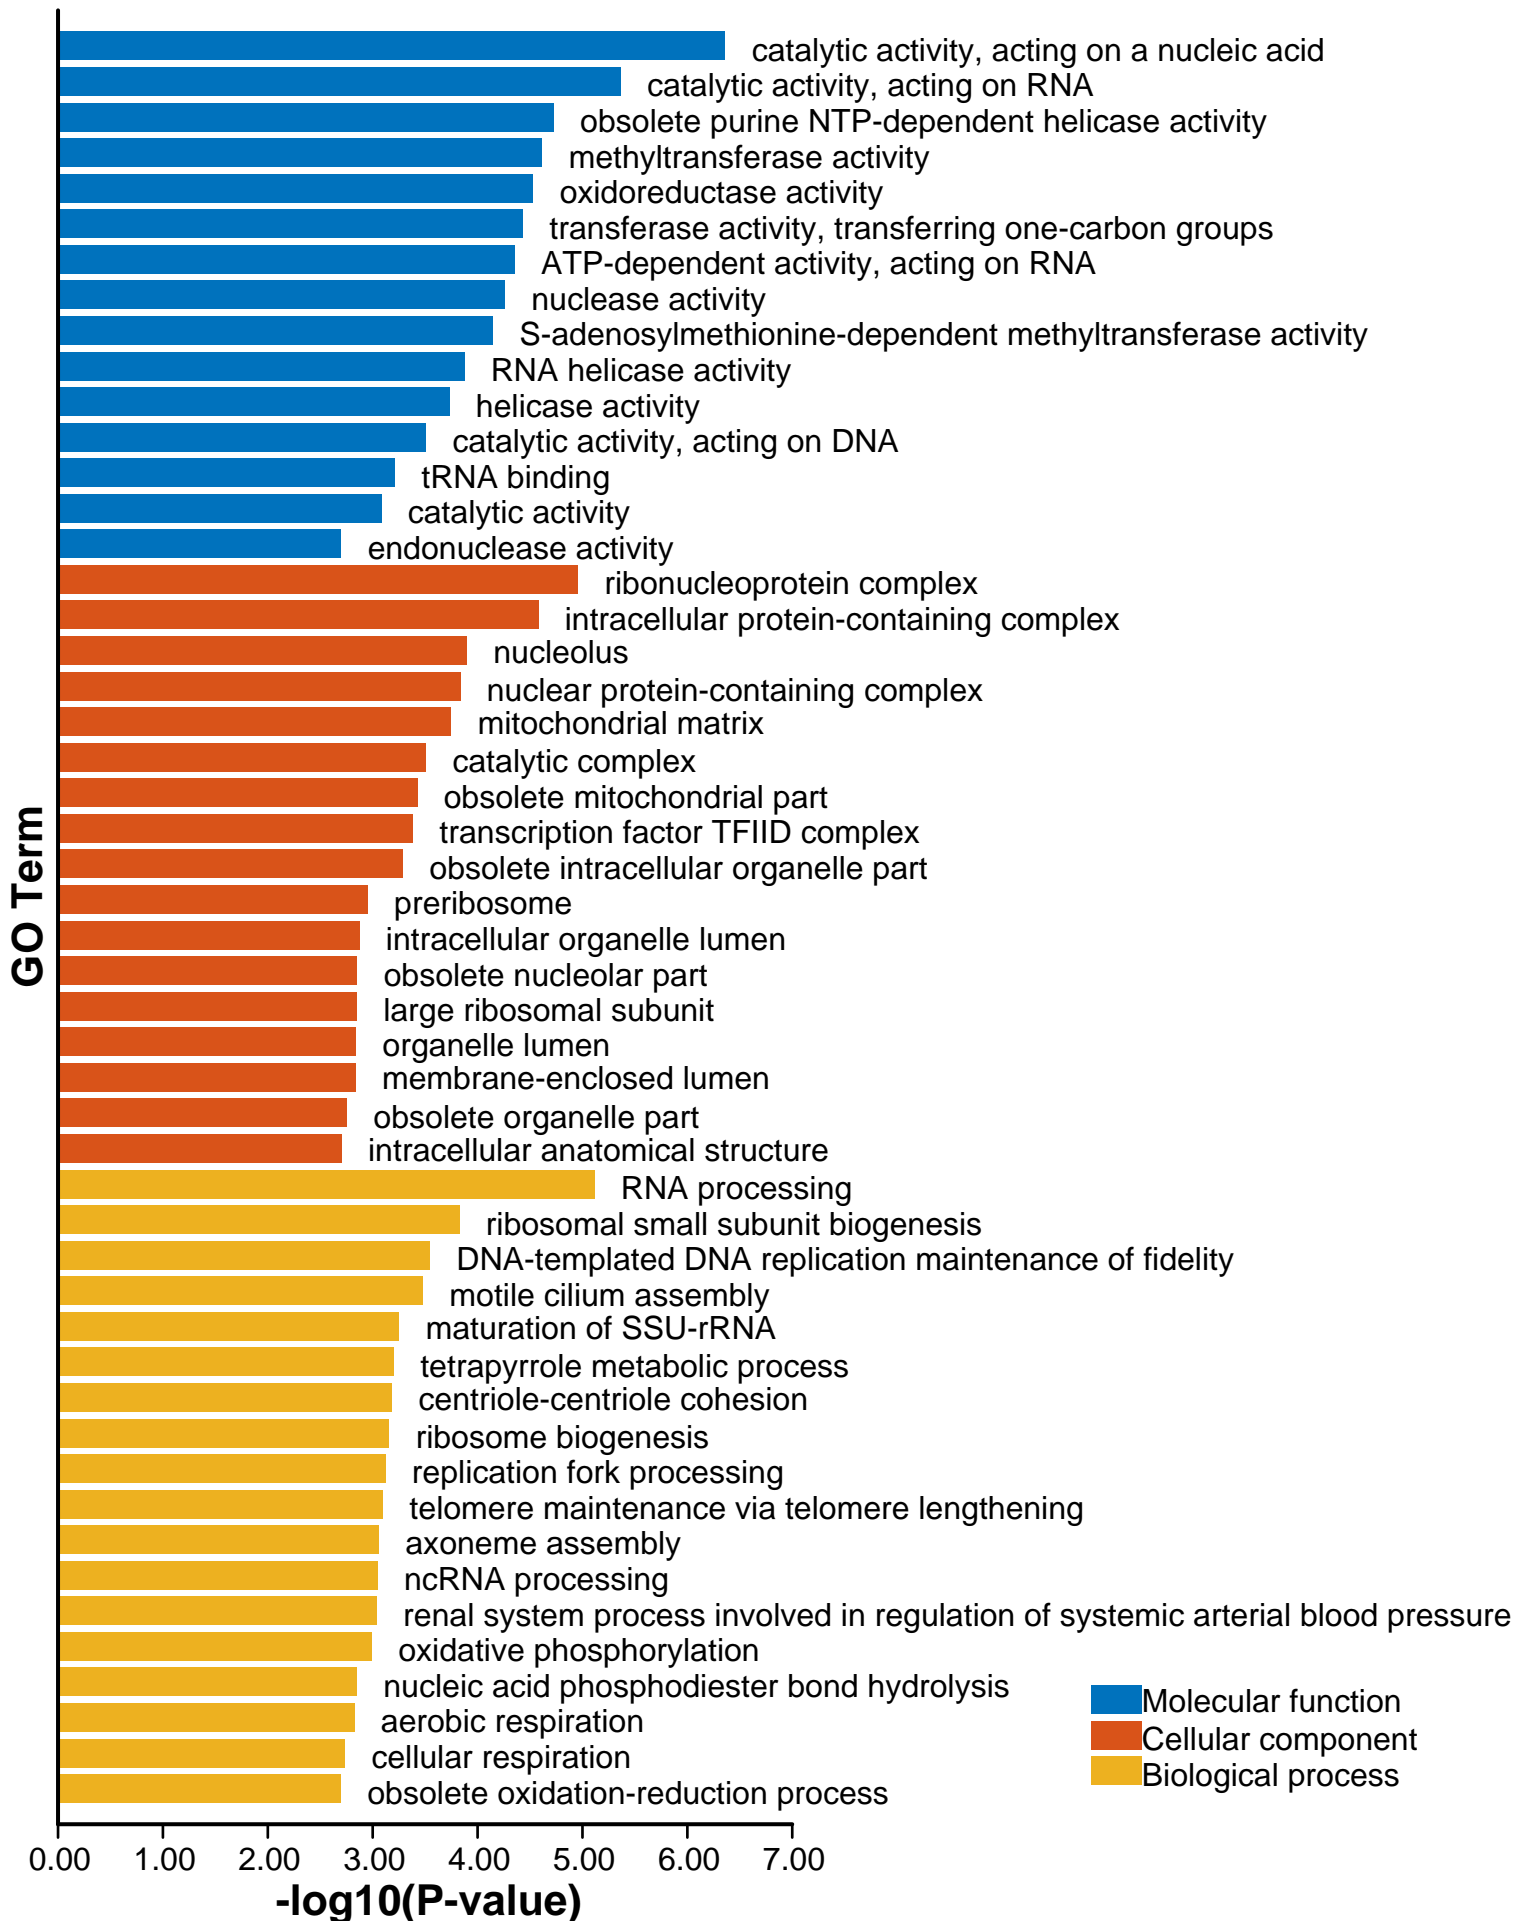

**Supplementary Fig. 34.** GO enrichment analysis of the complete and single copy BUSCO genes in the subM of *P. rabaudi*.

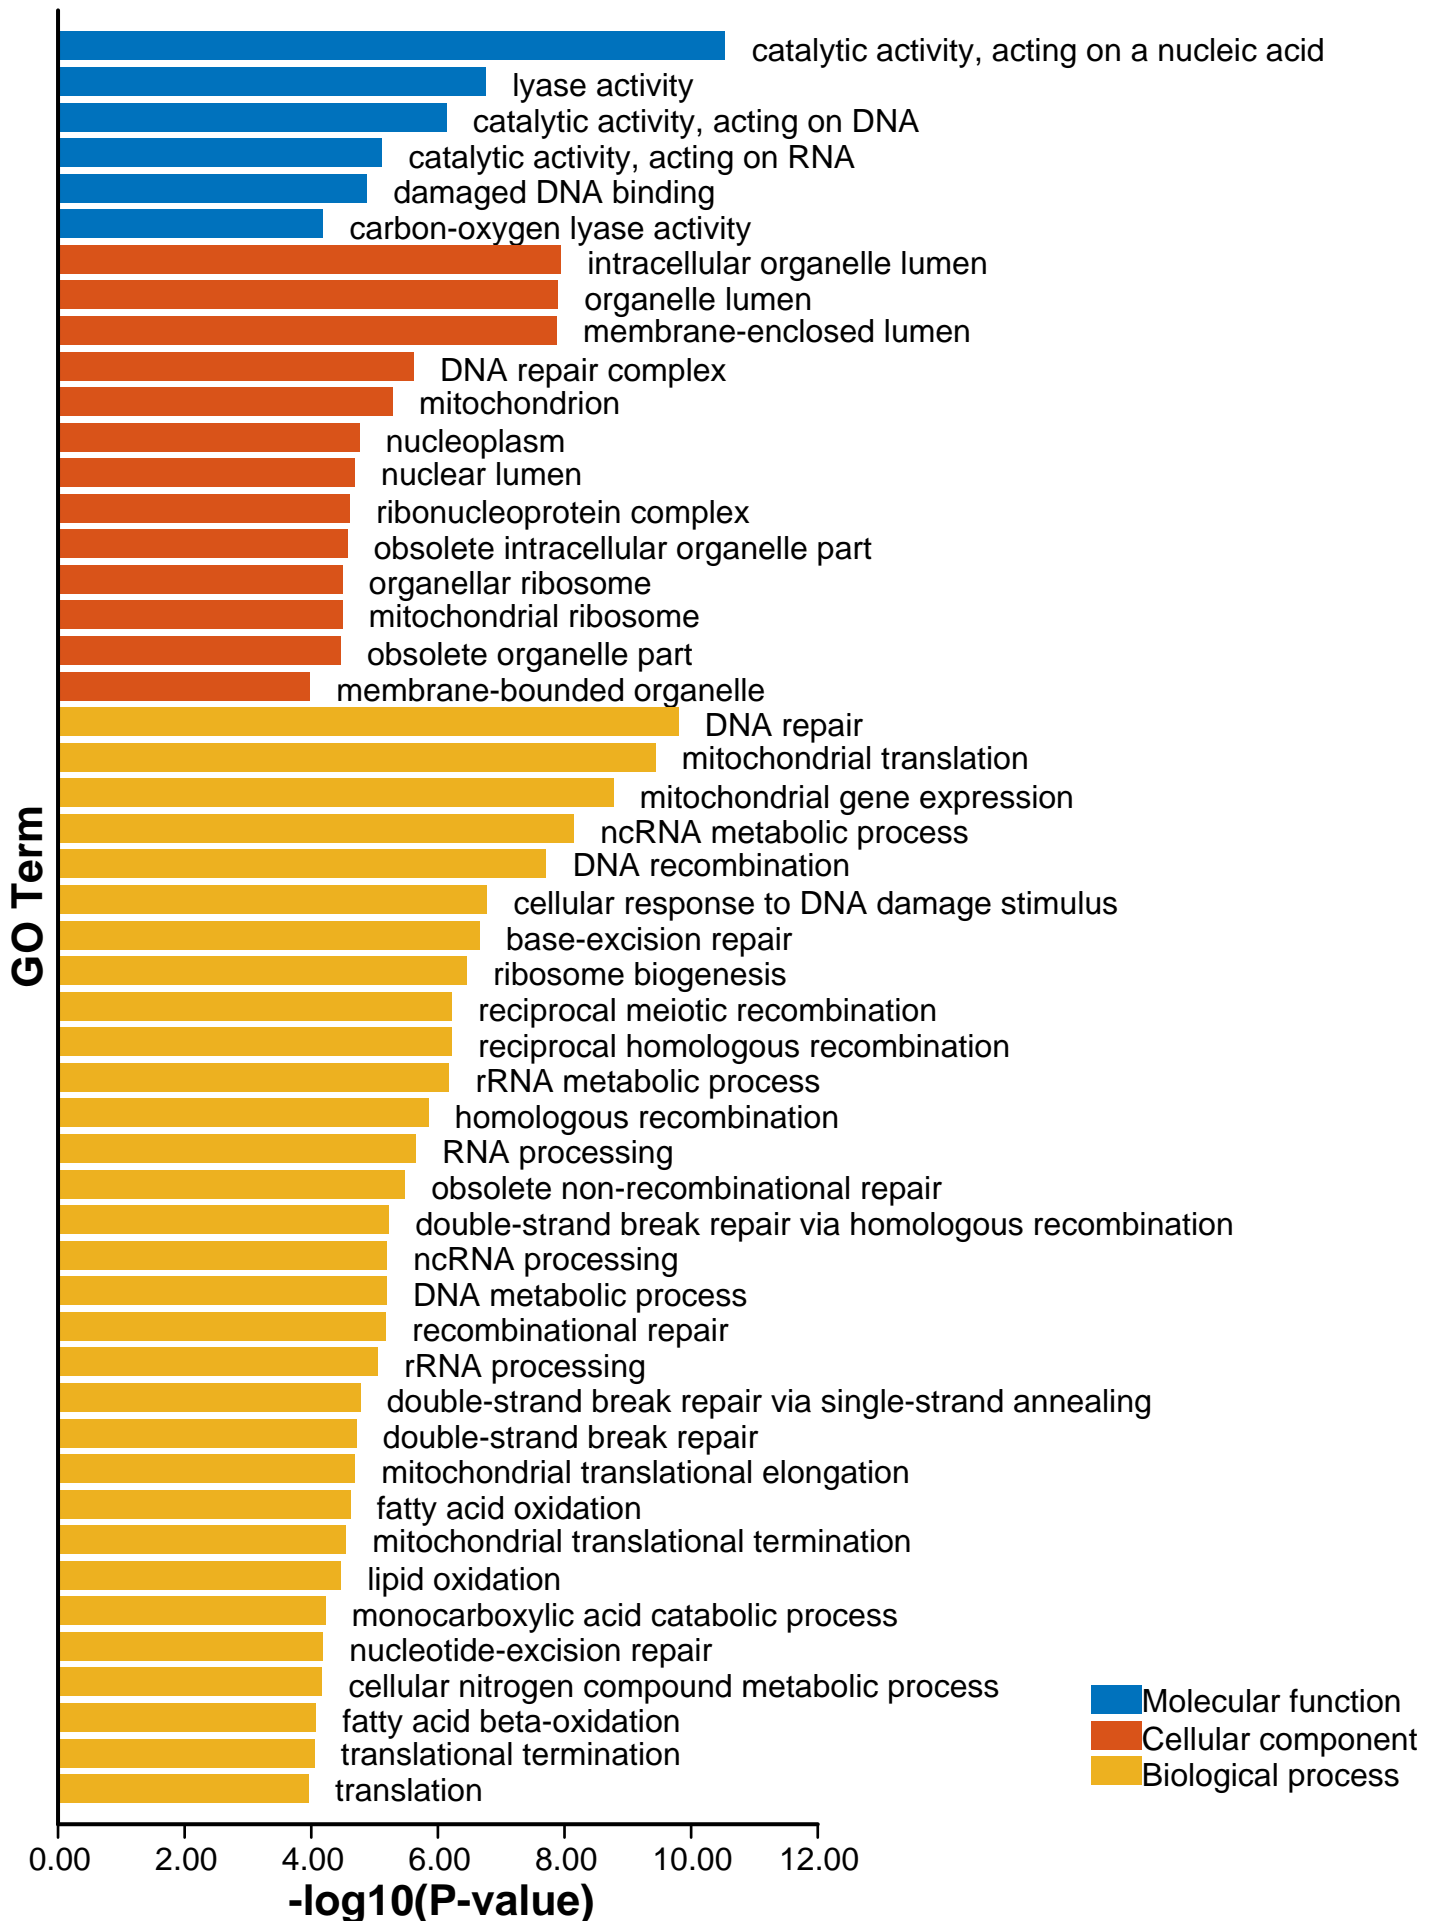

**Supplementary Fig. 35.** GO enrichment analysis of the complete and single copy BUSCO genes in the subP of *L. capito*.



**Supplementary Fig. 36.** GO enrichment analysis of the complete and single copy BUSCO genes in the subM of *L. capito*.

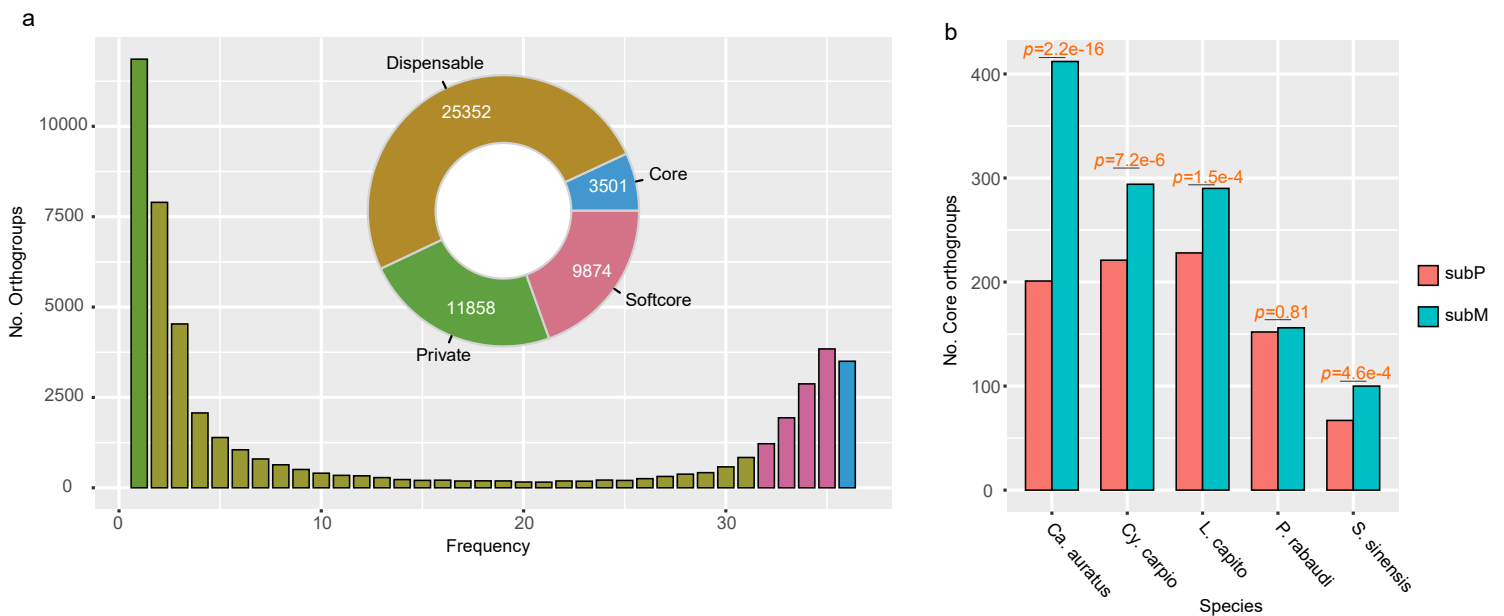

**Supplementary Fig. 37.** Pan-gene analysis. **a** Frequency of orthogroups. The pie chart shows the proportion of core (shared by all 36 samples), softcore (shared by > 90% samples but not all), dispensable (shared by more than one but  $\leq$  90% samples), and private genes (present in only one sample) in those genomes. **b** Number of core genes that exists only in subP and subM of allopolyploids. There tends to be a statistically significant number of core genes biased distribution toward the subM in all species except *P. rabaudi* ( $X^2$  test;  $p$ -value $\leq 4.6e-4$ ).



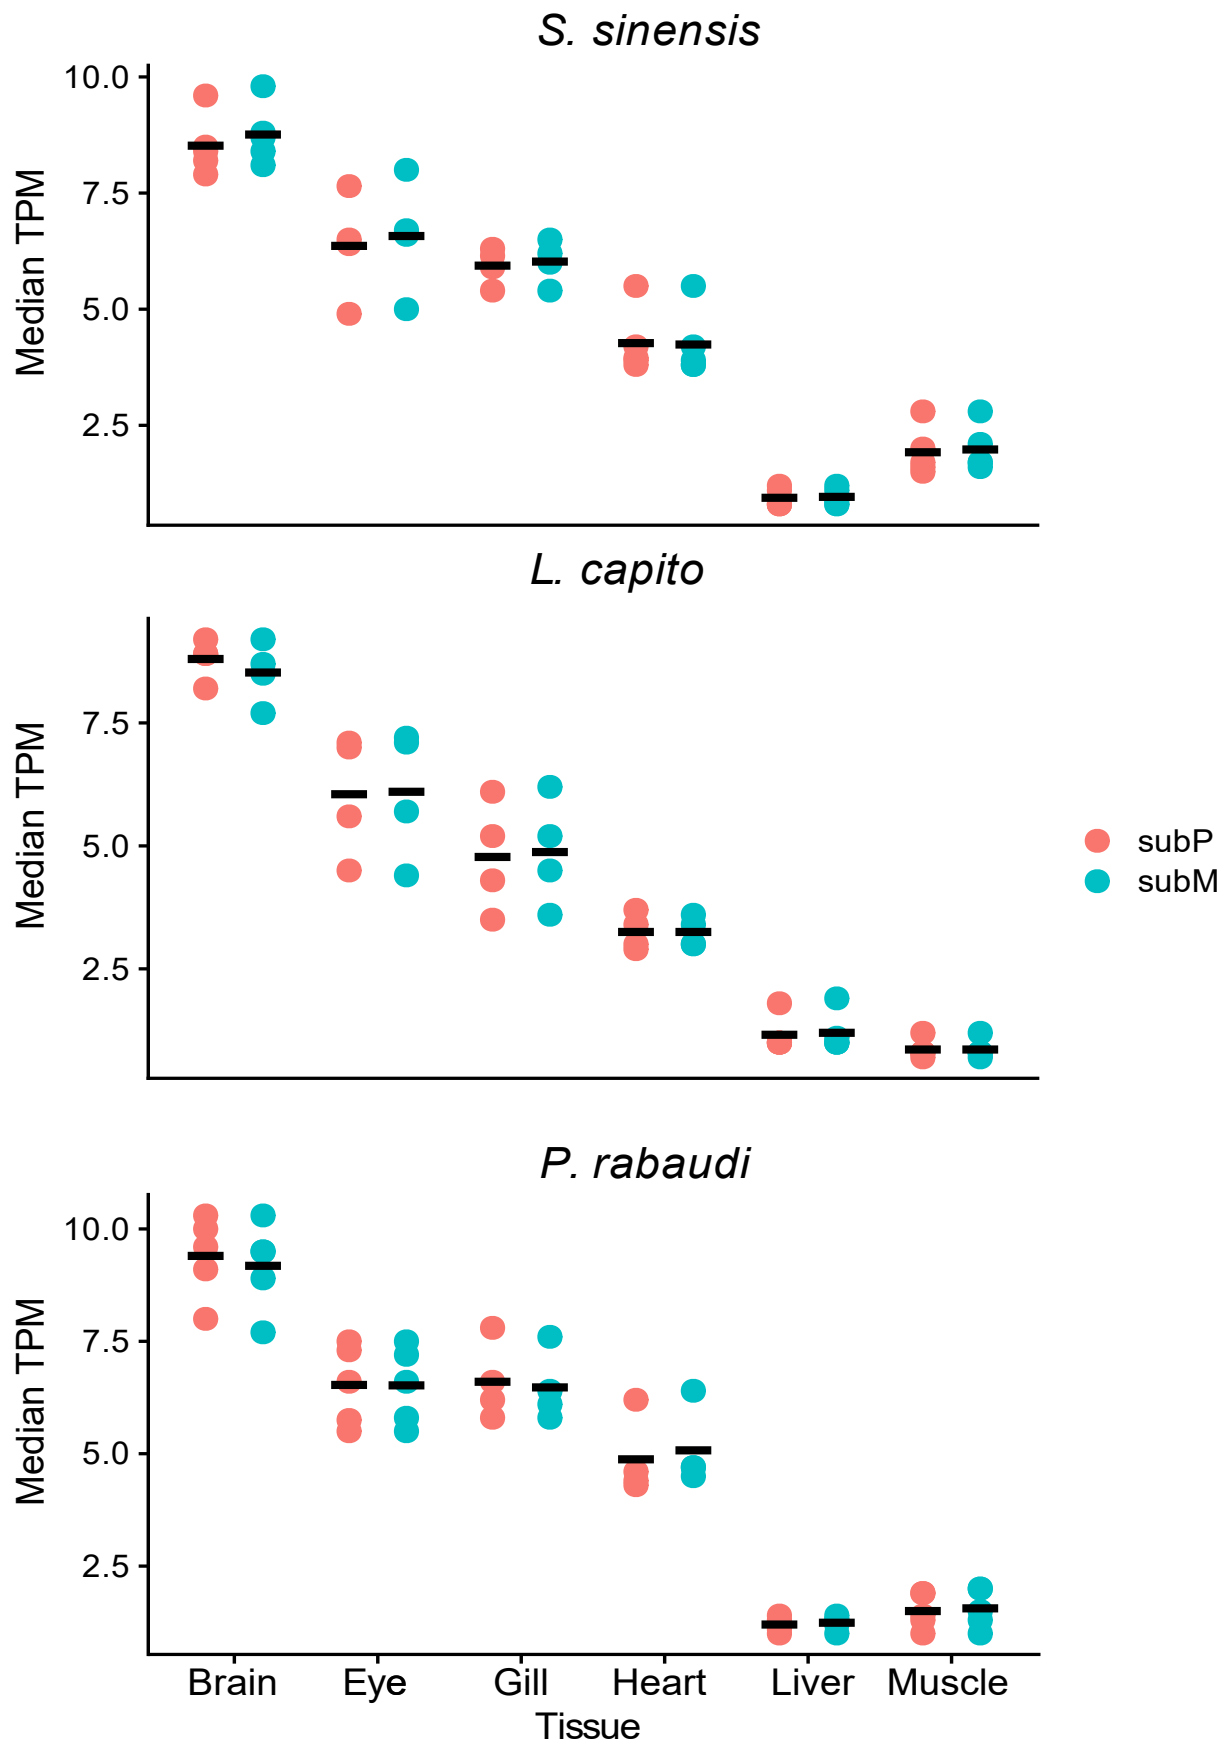

**Supplementary Fig. 38.** Median TPM of genes from three to five replicates of RNAseq across six tissue types in *S. sinensis*, *L. capito*, and *P. rabaudi*. Median TPM values displayed are separated by subP (red) and subM (blue) with the average across all three to five replicates for each subgenome/tissue indicated by horizontal black bars.

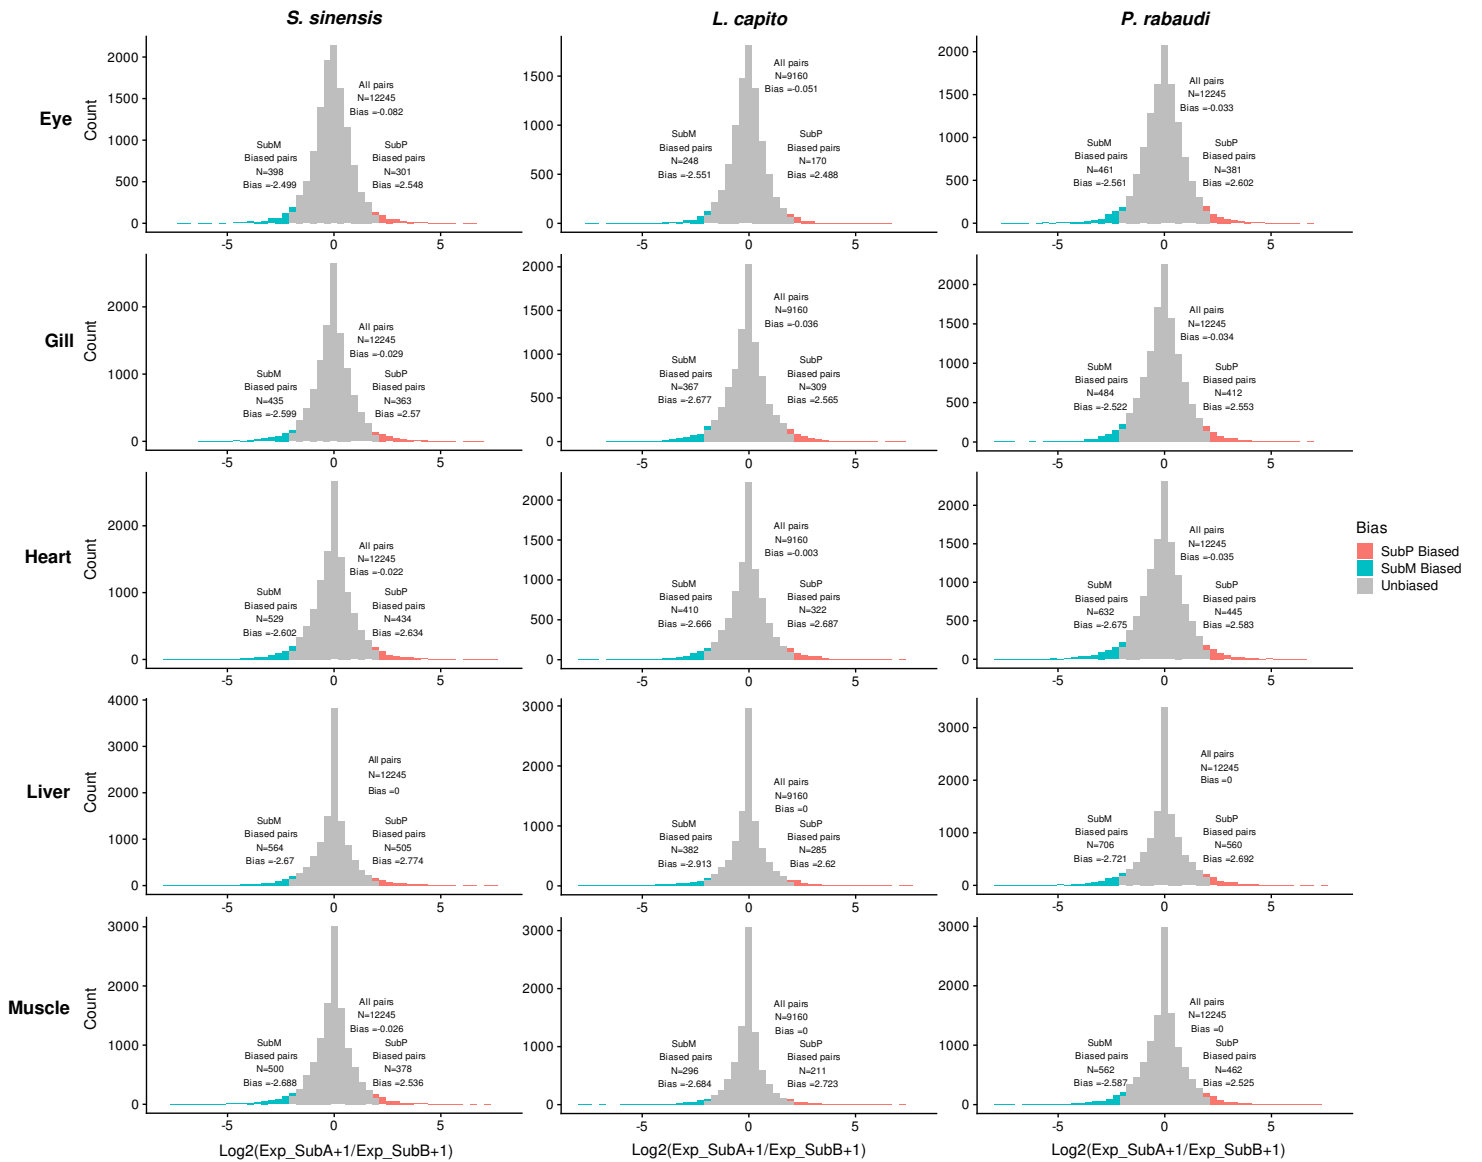

**Supplementary Fig. 39.** Expression of homoeolog pairs plotted as subP biased syntelogs (red), subM biased syntelogs (blue) and unbiased syntelogs (grey) was shown in five tissues.

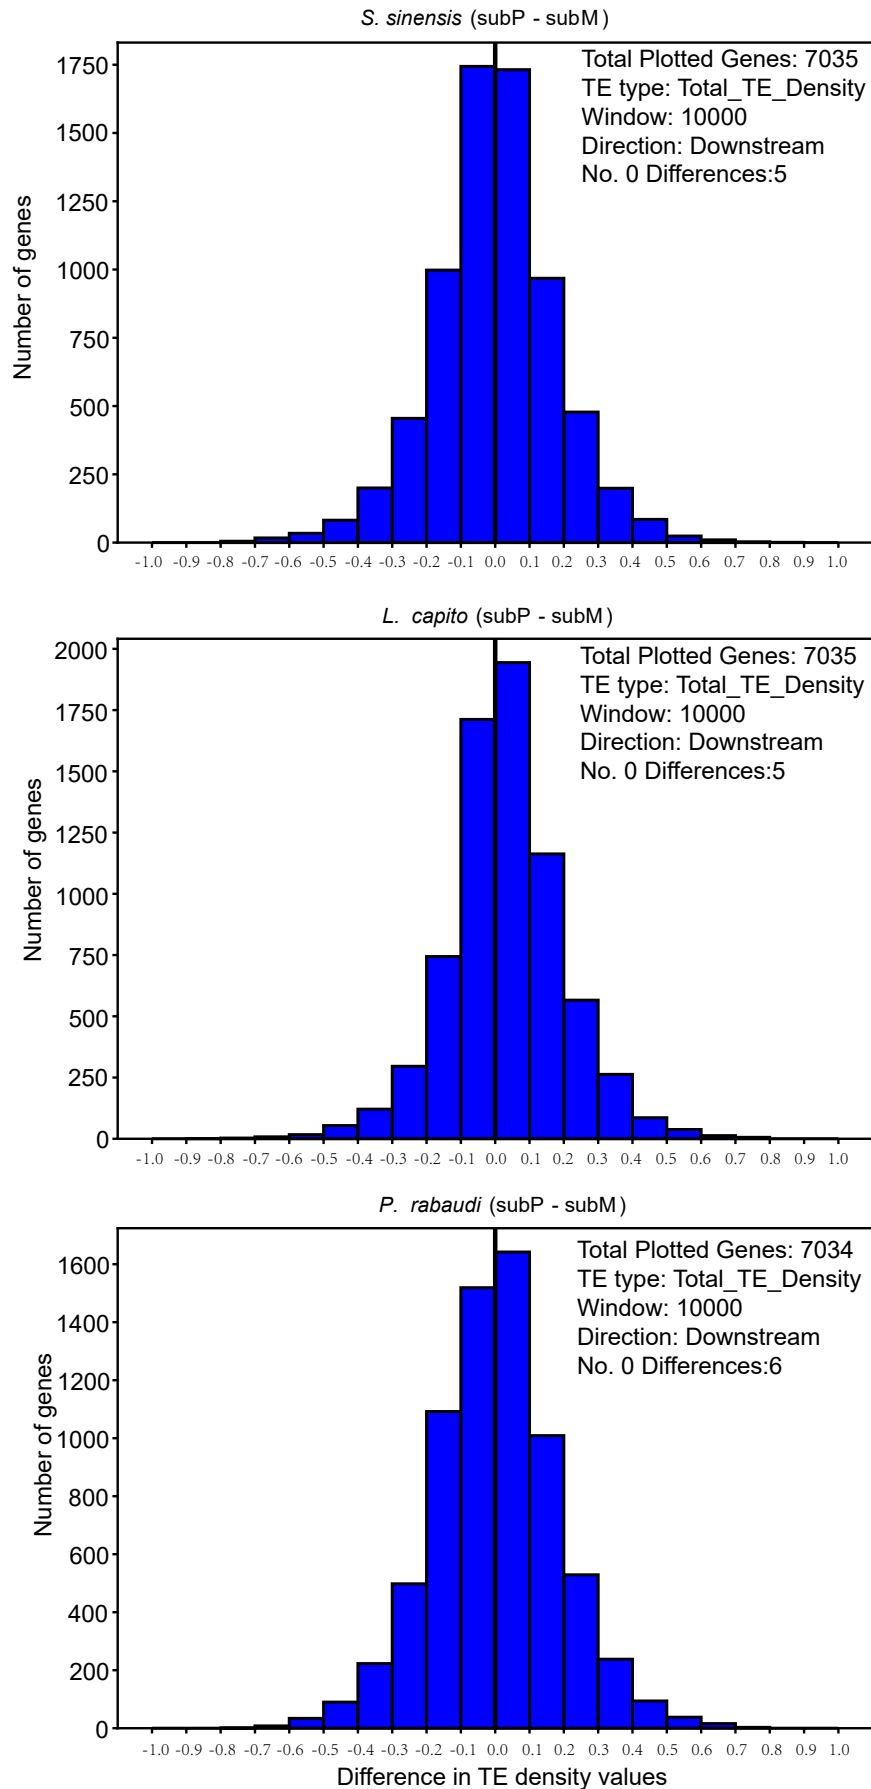

**Supplementary Fig. 40.** Histograms of differences in TE density values downstream of subP and subM syntelogs of *S. sinensis*, *L. capito*, and *P. rabaudi*. The density values were calculated for all TEs in a 10,000 bp window downstream of genes and difference values were calculated by subtracting TE density of subM syntelogs from subP syntelogs. Negative values represent higher TE density for syntelogs in the subM, whereas positive values reflect higher TE density for the subP syntelogs.

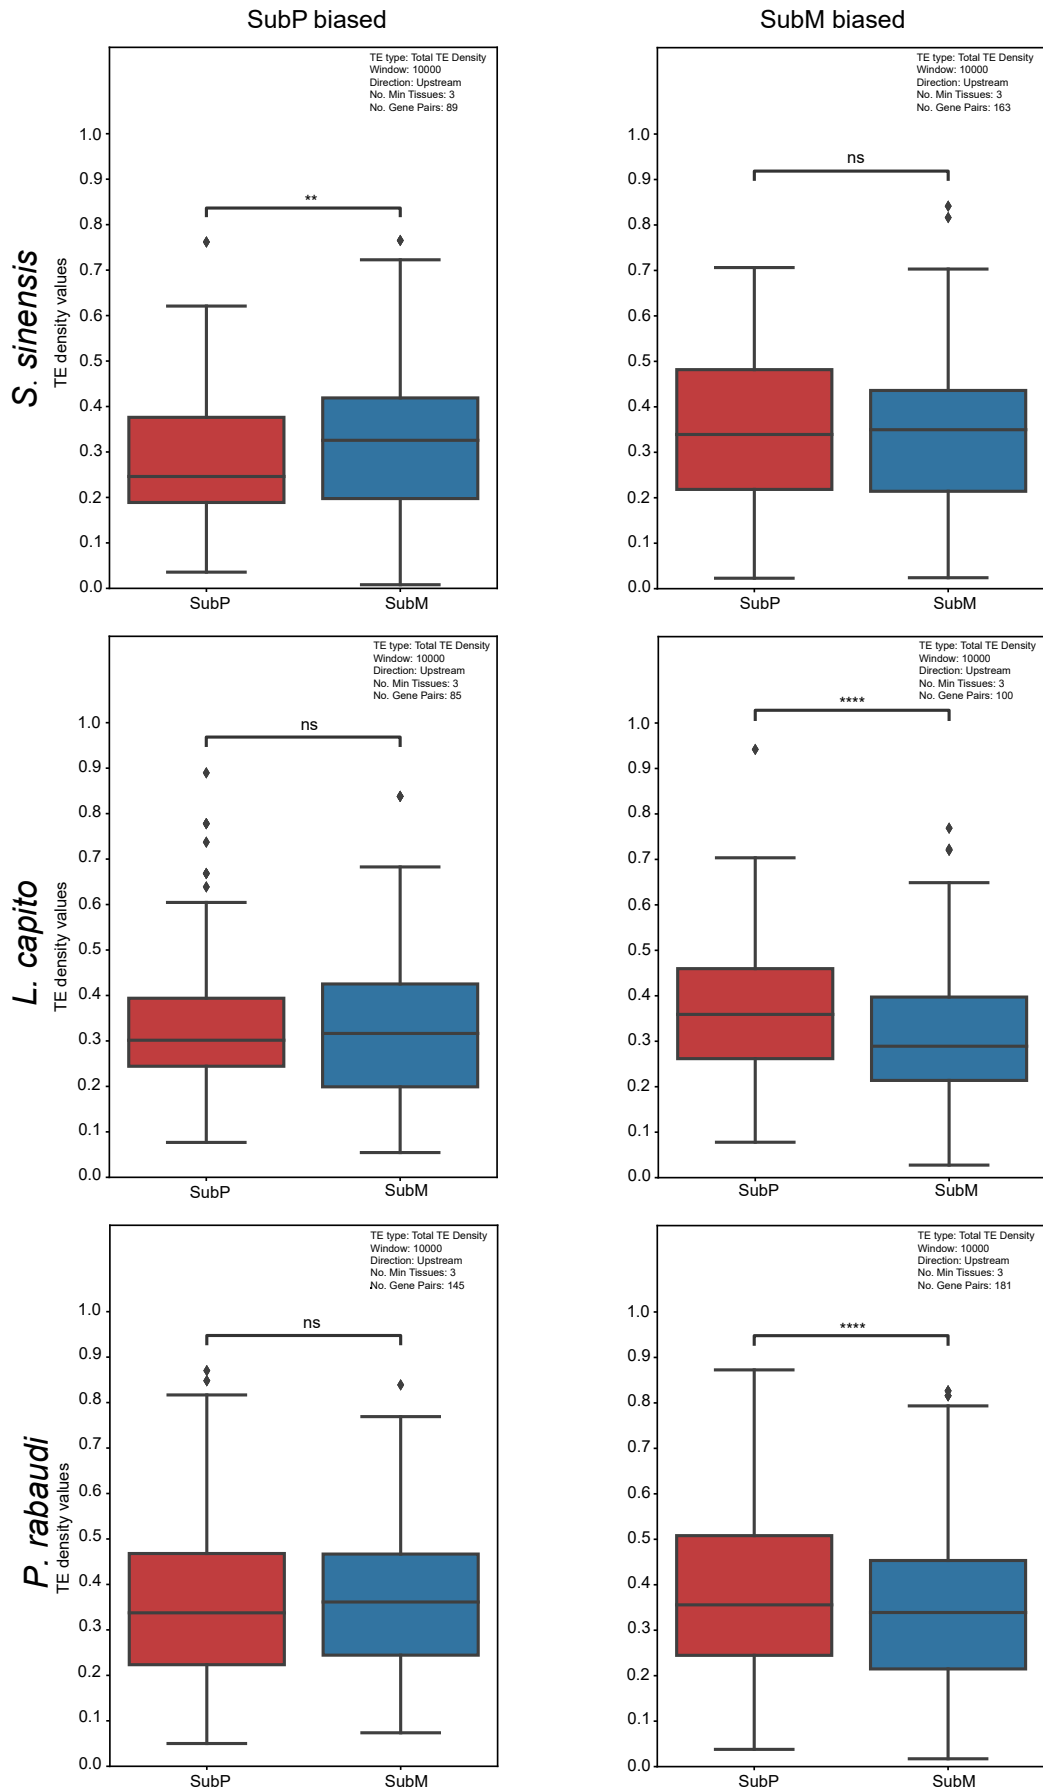

**Supplementary Fig. 41.** Boxplots of TE density values for genes exhibiting biased expression in subP (left column) and subM (right column). TE density of syntelogs in subP (red) and subM (blue) for *S. sinensis*, *L. capito*, and *P. rabaudi* were plotted for 10,000 bp windows upstream of gene start sites. Two-sample t-test results are shown as non-significant (ns),  $p < 0.005$  (\*\*), and  $p < 0.00005$  (\*\*\*\*).

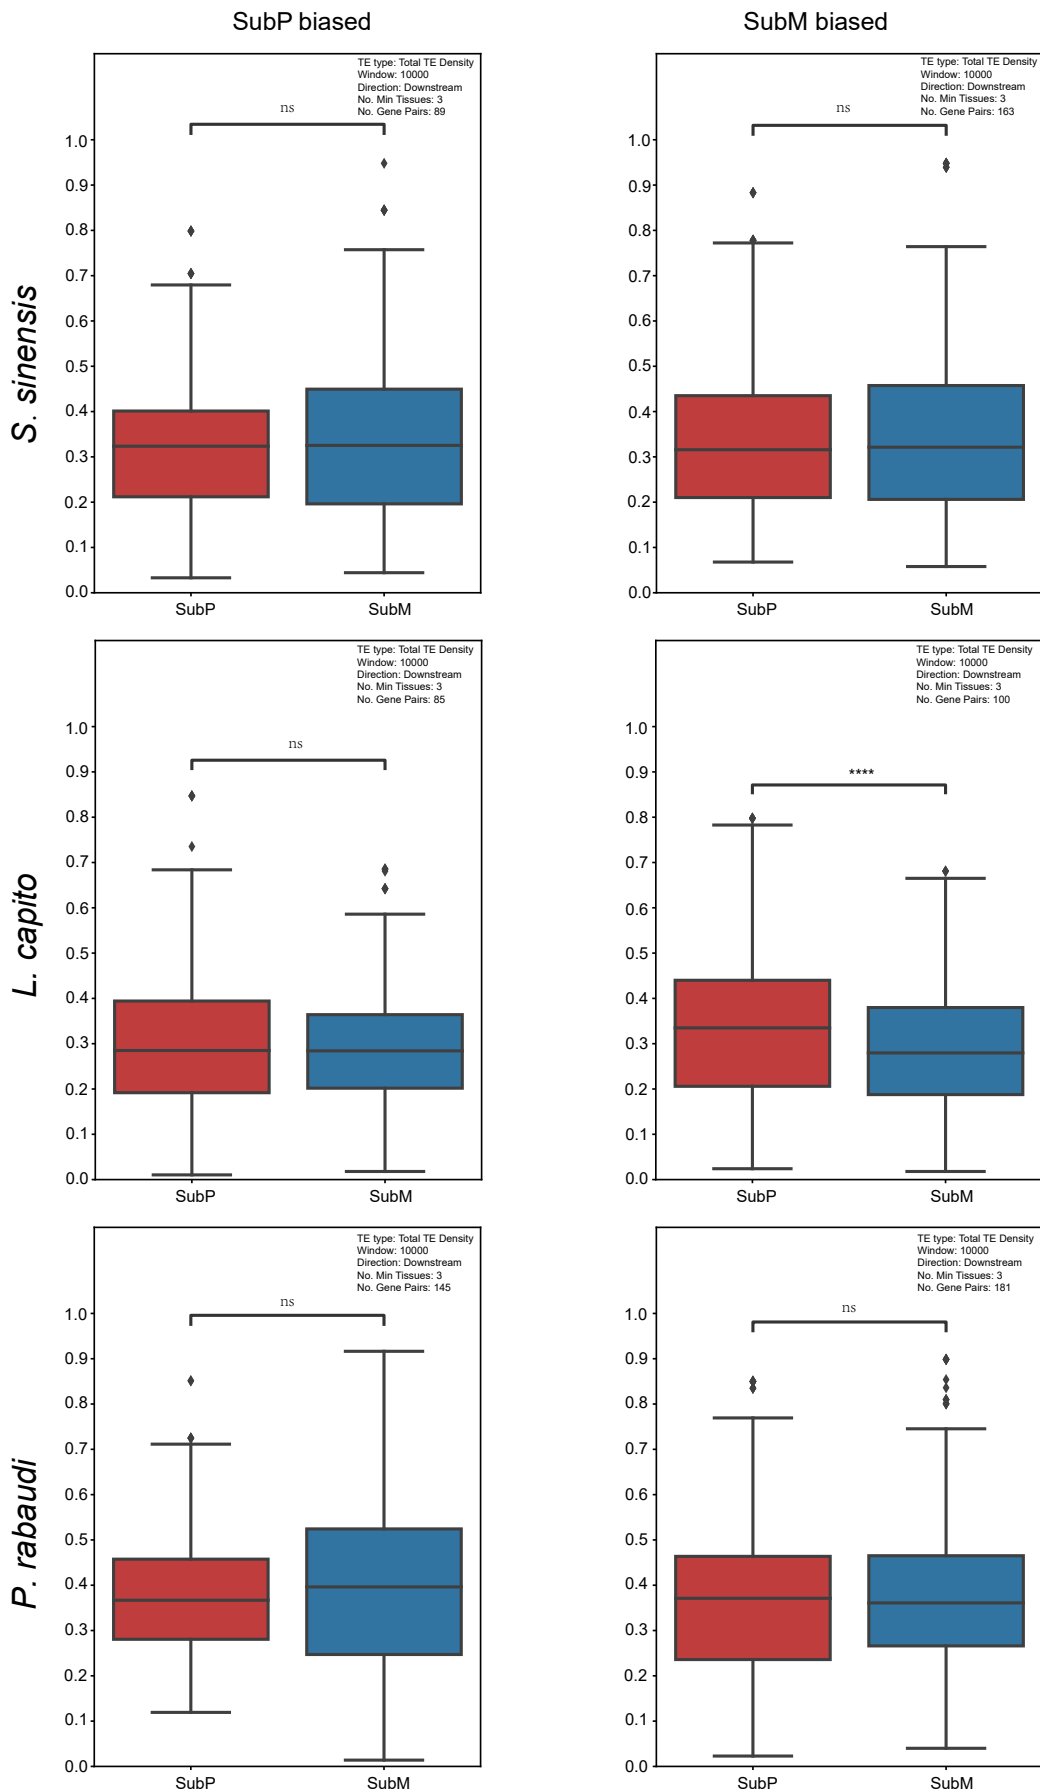

**Supplementary Fig. 42.** Boxplots of TE density values for genes exhibiting biased expression in subP (left column) and subM (right column). TE density of syntelogs in subP (red) and subM (blue) for *S. sinensis*, *L. capito*, and *P. rabaudi* were plotted for 10,000 bp windows downstream of gene start sites. Two-sample t-test results are shown as non-significant (ns) and  $p < 0.00005$  (\*\*\*\*).

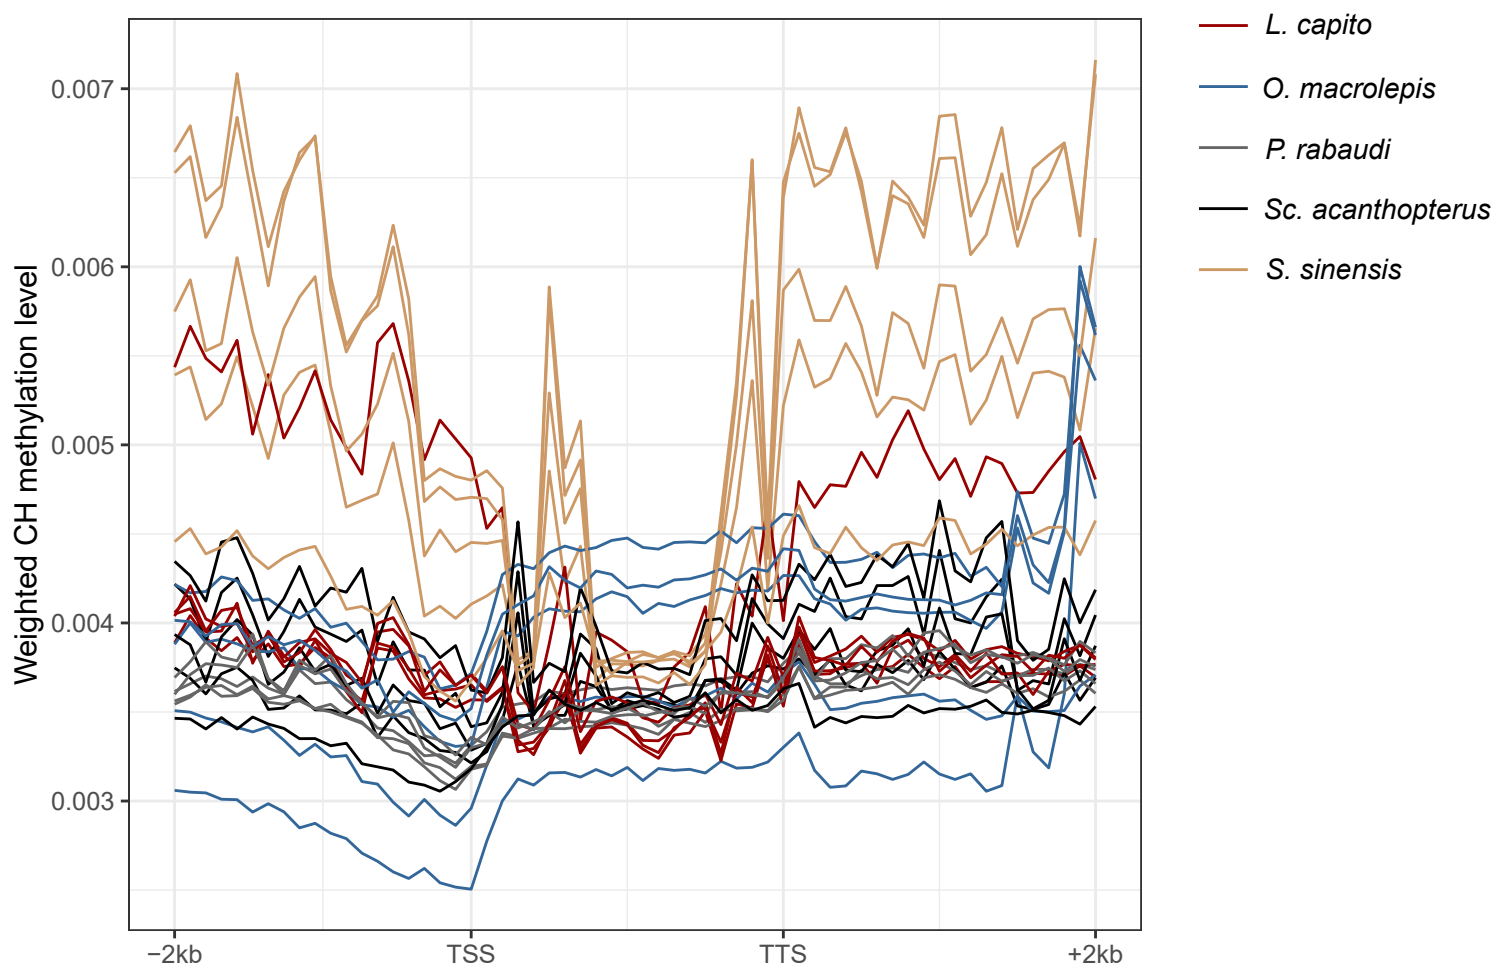

**Supplementary Fig. 43.** Methylation levels at the CH sites of two diploid ancestors *O. macrolepis* and *Sc. acanthopterus* and three allotetraploids *S. sinensis*, *L. capito*, and *P. rabaudi*. The x axis represented the gene body (TSS = transcription start site and TTS = transcription termination site) and 2 kb upstream and downstream region. The y axis showed the weighted CH methylation level.

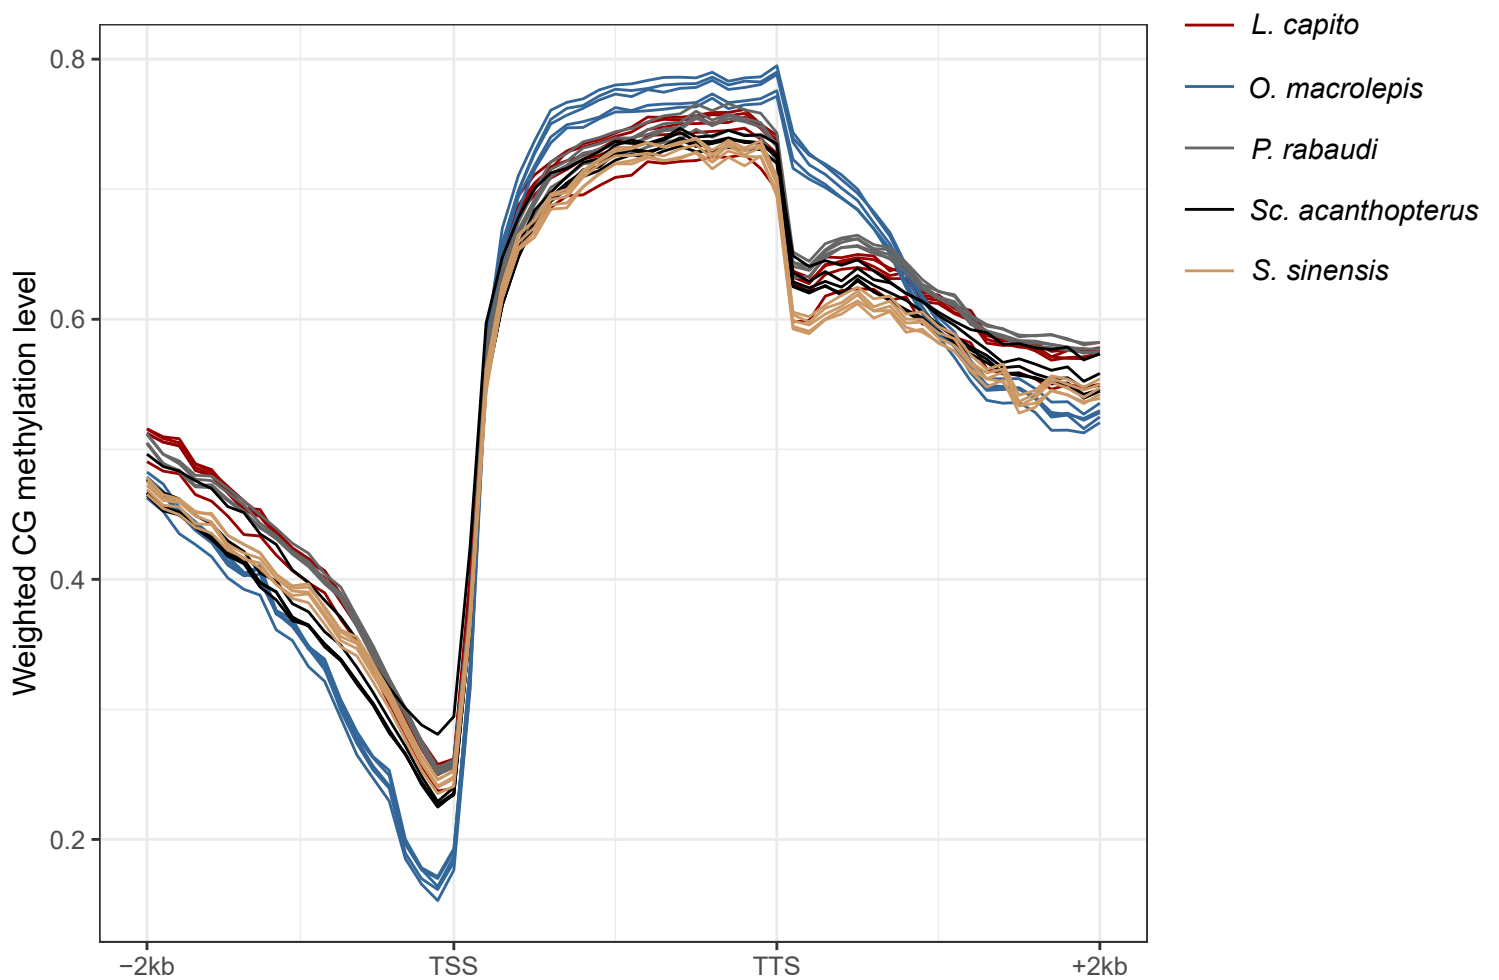

**Supplementary Fig. 44.** CG methylation pattern of two diploid ancestors *O. macrolepis* and *Sc. acanthopterus* and three allotetraploids *S. sinensis*, *L. capito*, and *P. rabaudi*. The x axis showed the gene body (TSS and TTS) and 2 kb upstream and downstream region. The y axis was the weighted CG methylation level.

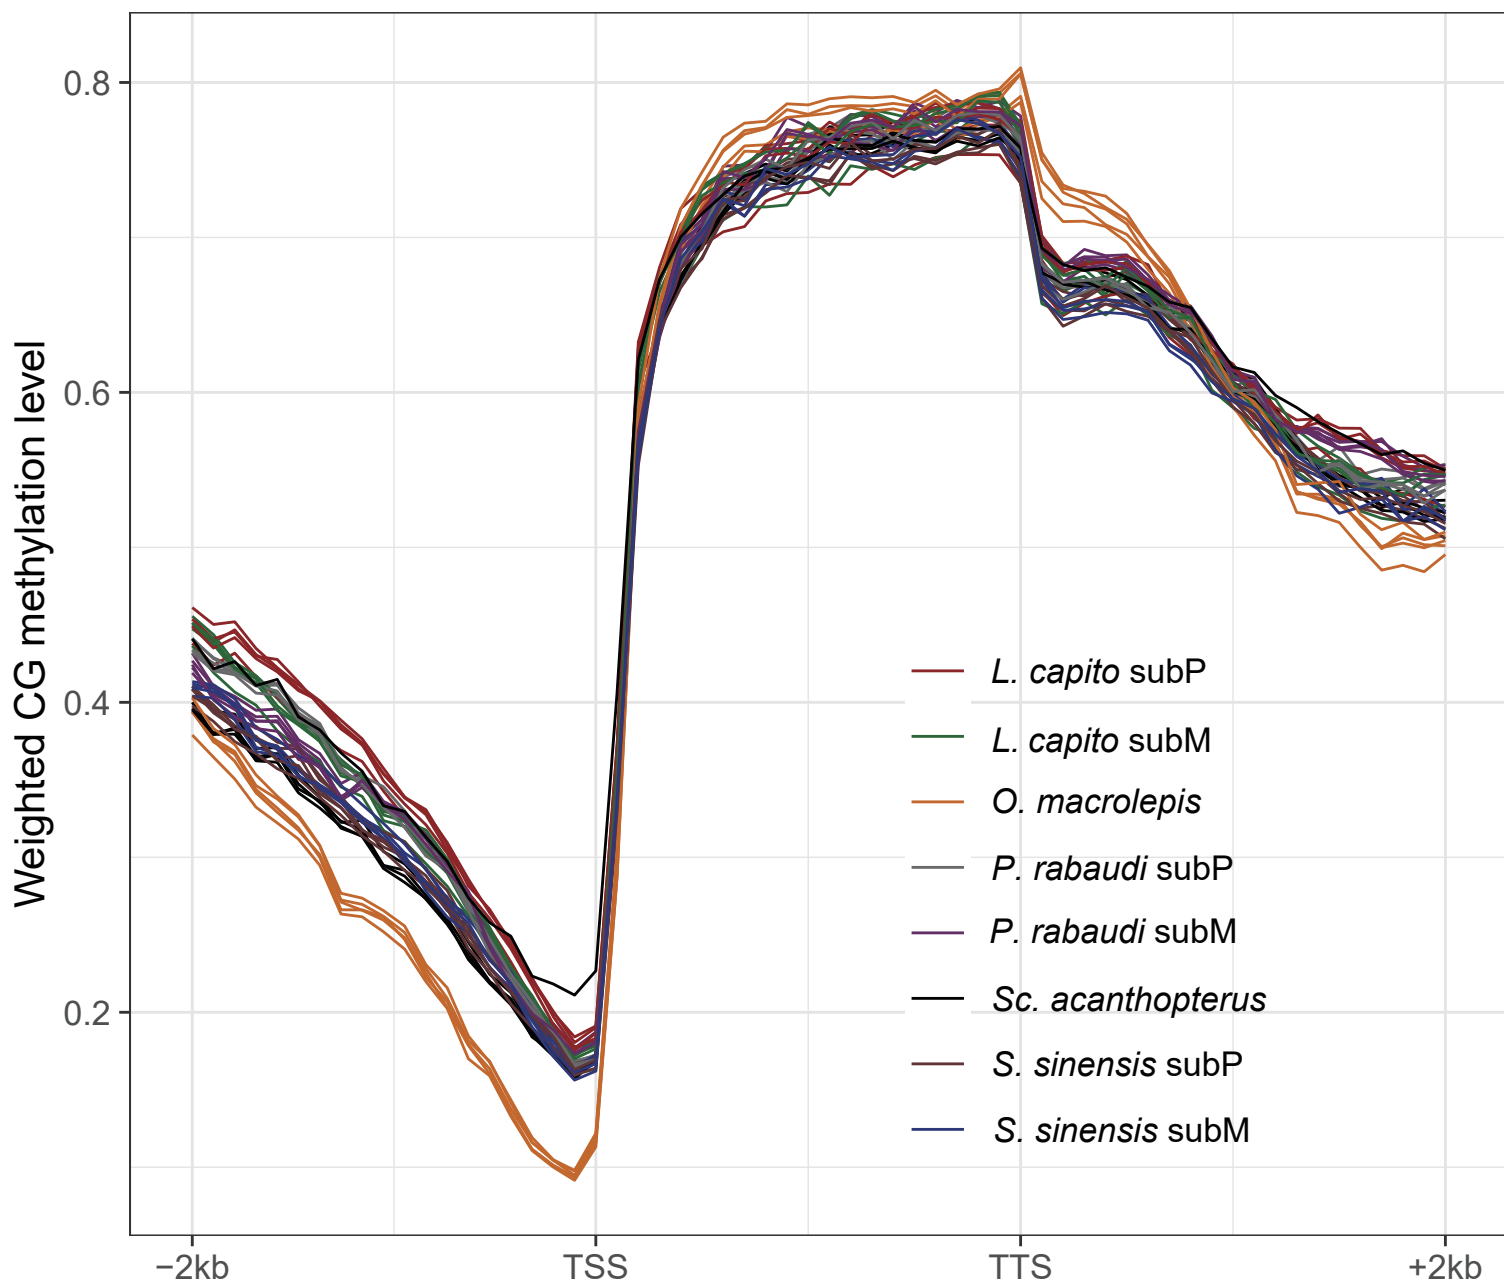

**Supplementary Fig. 45.** CG methylation pattern of 7040 genes with a 1:1:2:2:2 relationship (1 *O. macrolepis* gene, 1 *Sc. acanthopterus* gene, 2 *S. sinensis* genes, 2 *L. capito* genes and 2 *P. rabaudi* genes). The x and y axis represented the gene body (TSS and TTS) and 2 kb upstream and downstream region and weighted CG methylation level, respectively.



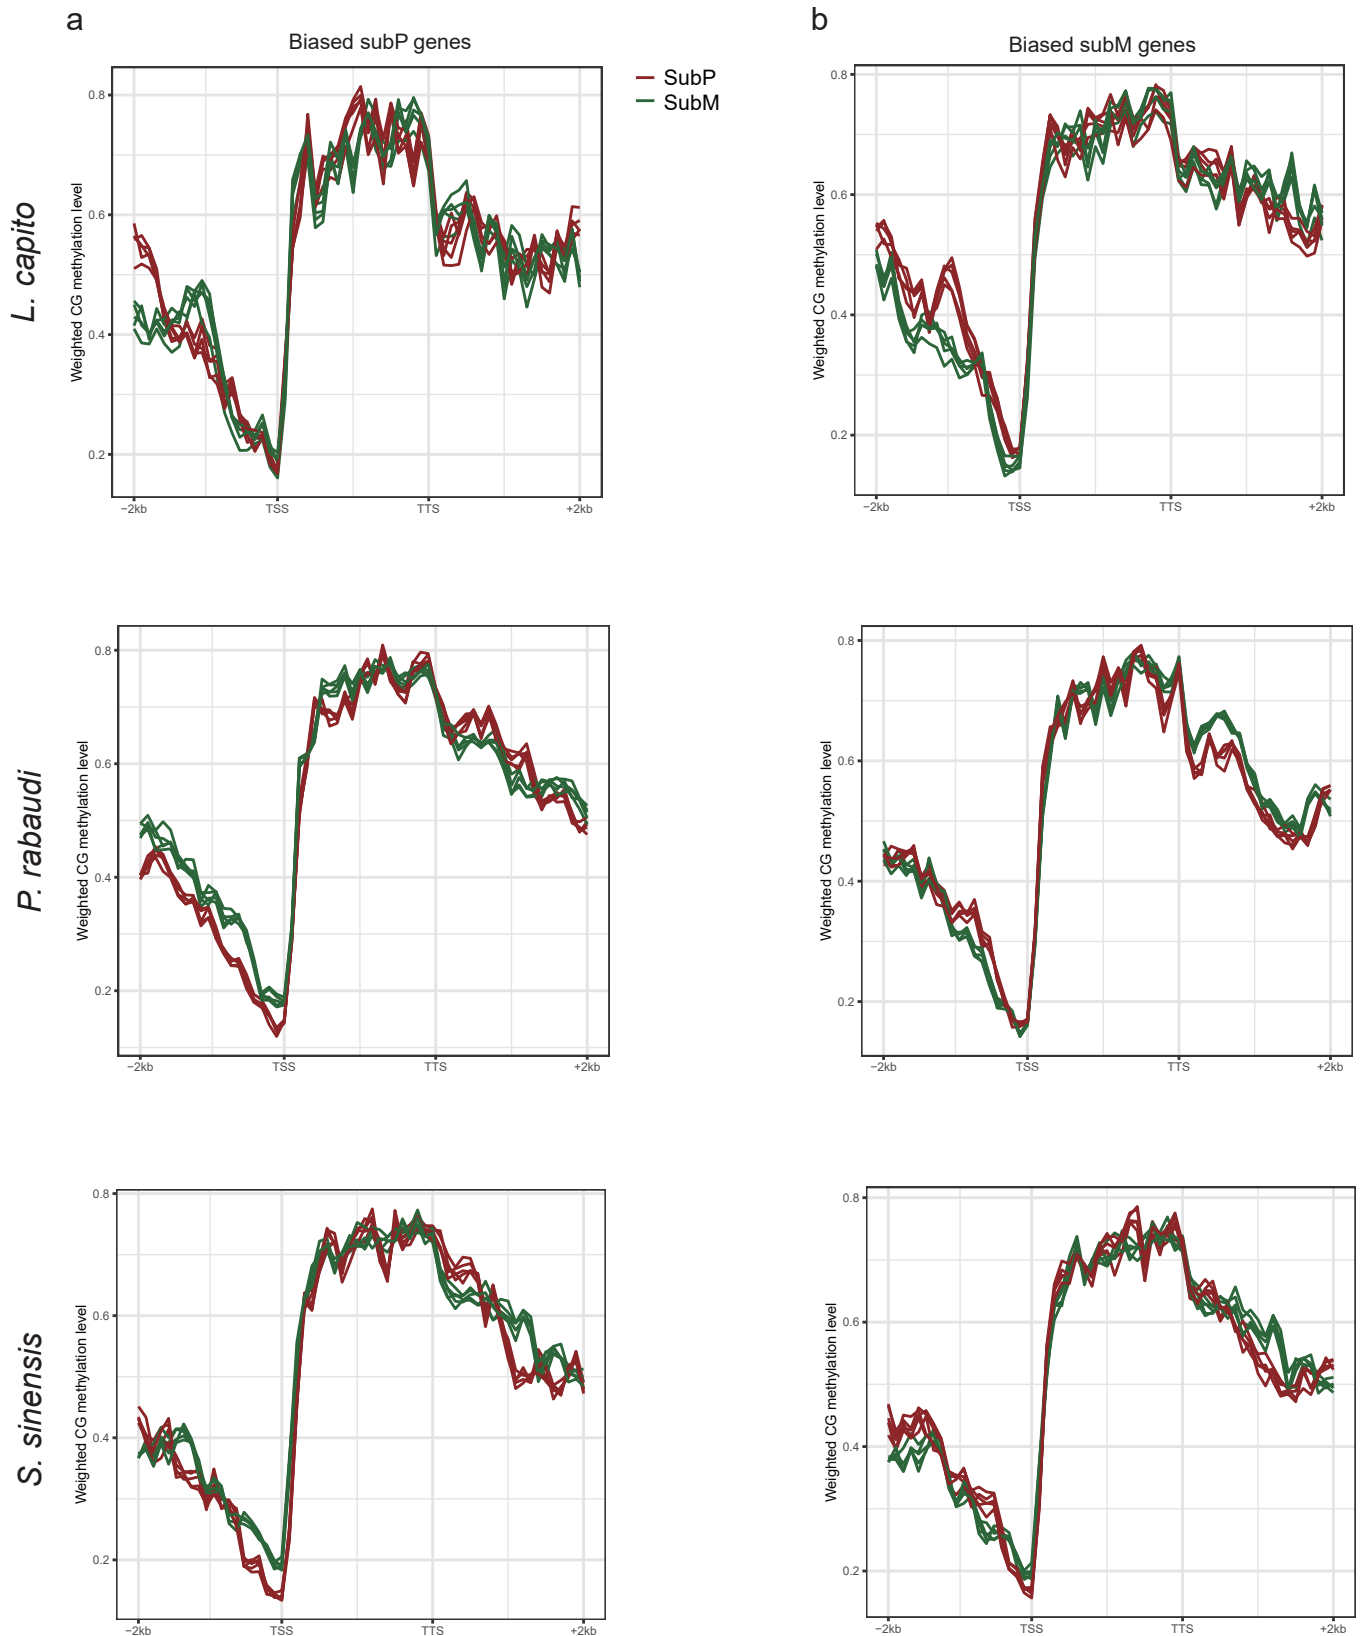

**Supplementary Fig. 46.** CG methylation levels of subP (a) or subM (b) biased expression genes in the muscle tissue of *L. capito*, *P. rabaudi* and *S. sinensis*. The x axis was the gene body and 2 kb upstream and downstream region. The y axis indicated the weighted CG methylation level.

**a**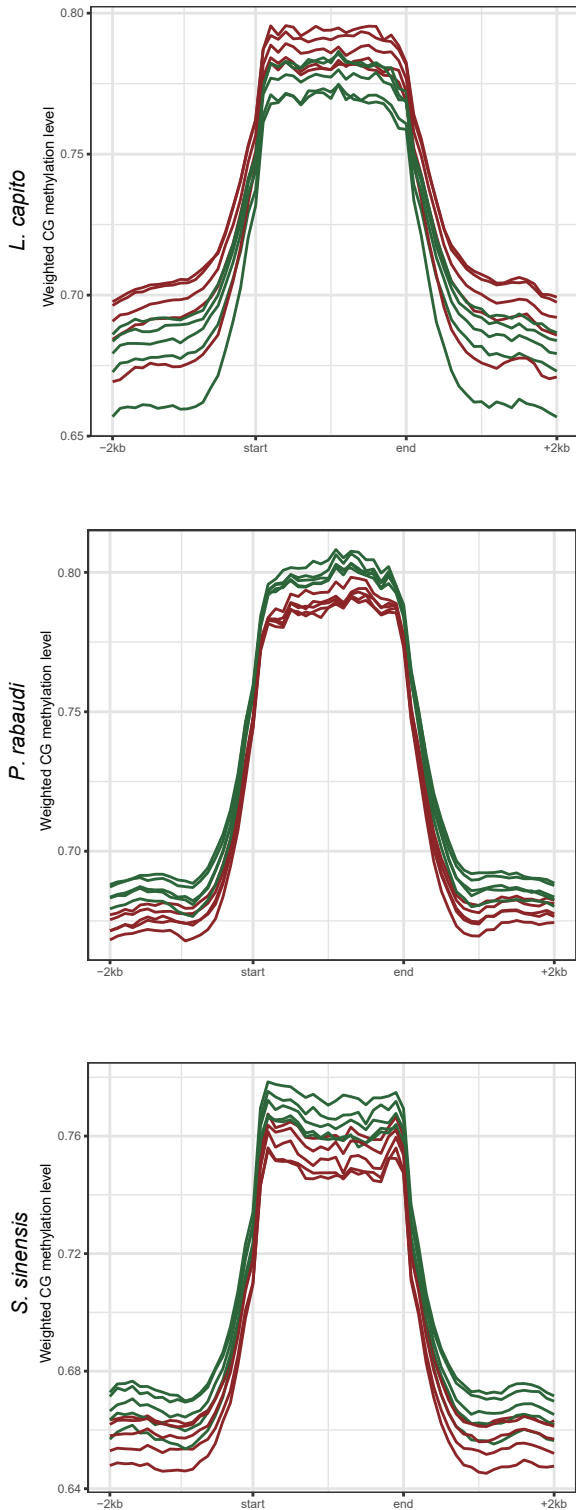**b**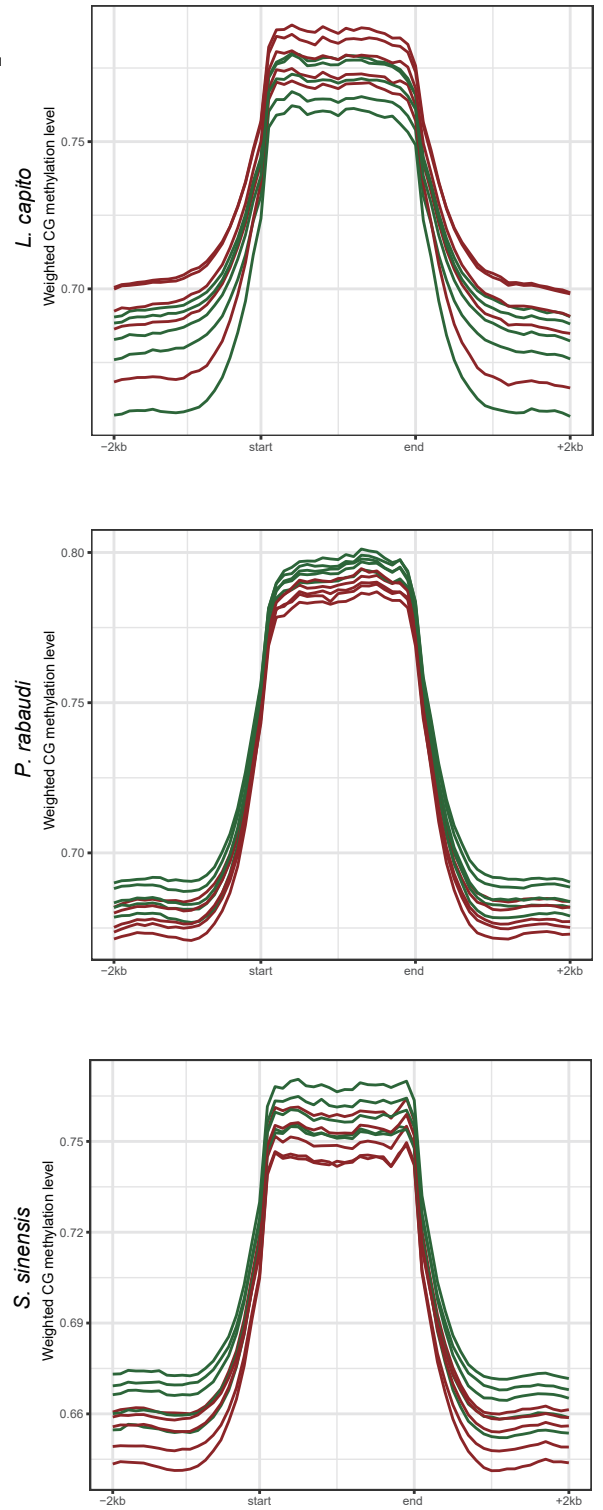

**Supplementary Fig. 47.** Comparison of TE mCG levels between subP (red) and subM (green). CG methylation of TEs that are in 1kb vicinity of 7040 positionally conserved syntenic ohnologs (a) and at the whole genome level (b). The x axis was the TE and 2 kb upstream and downstream region. The y axis indicated the weighted CG methylation level of TEs.

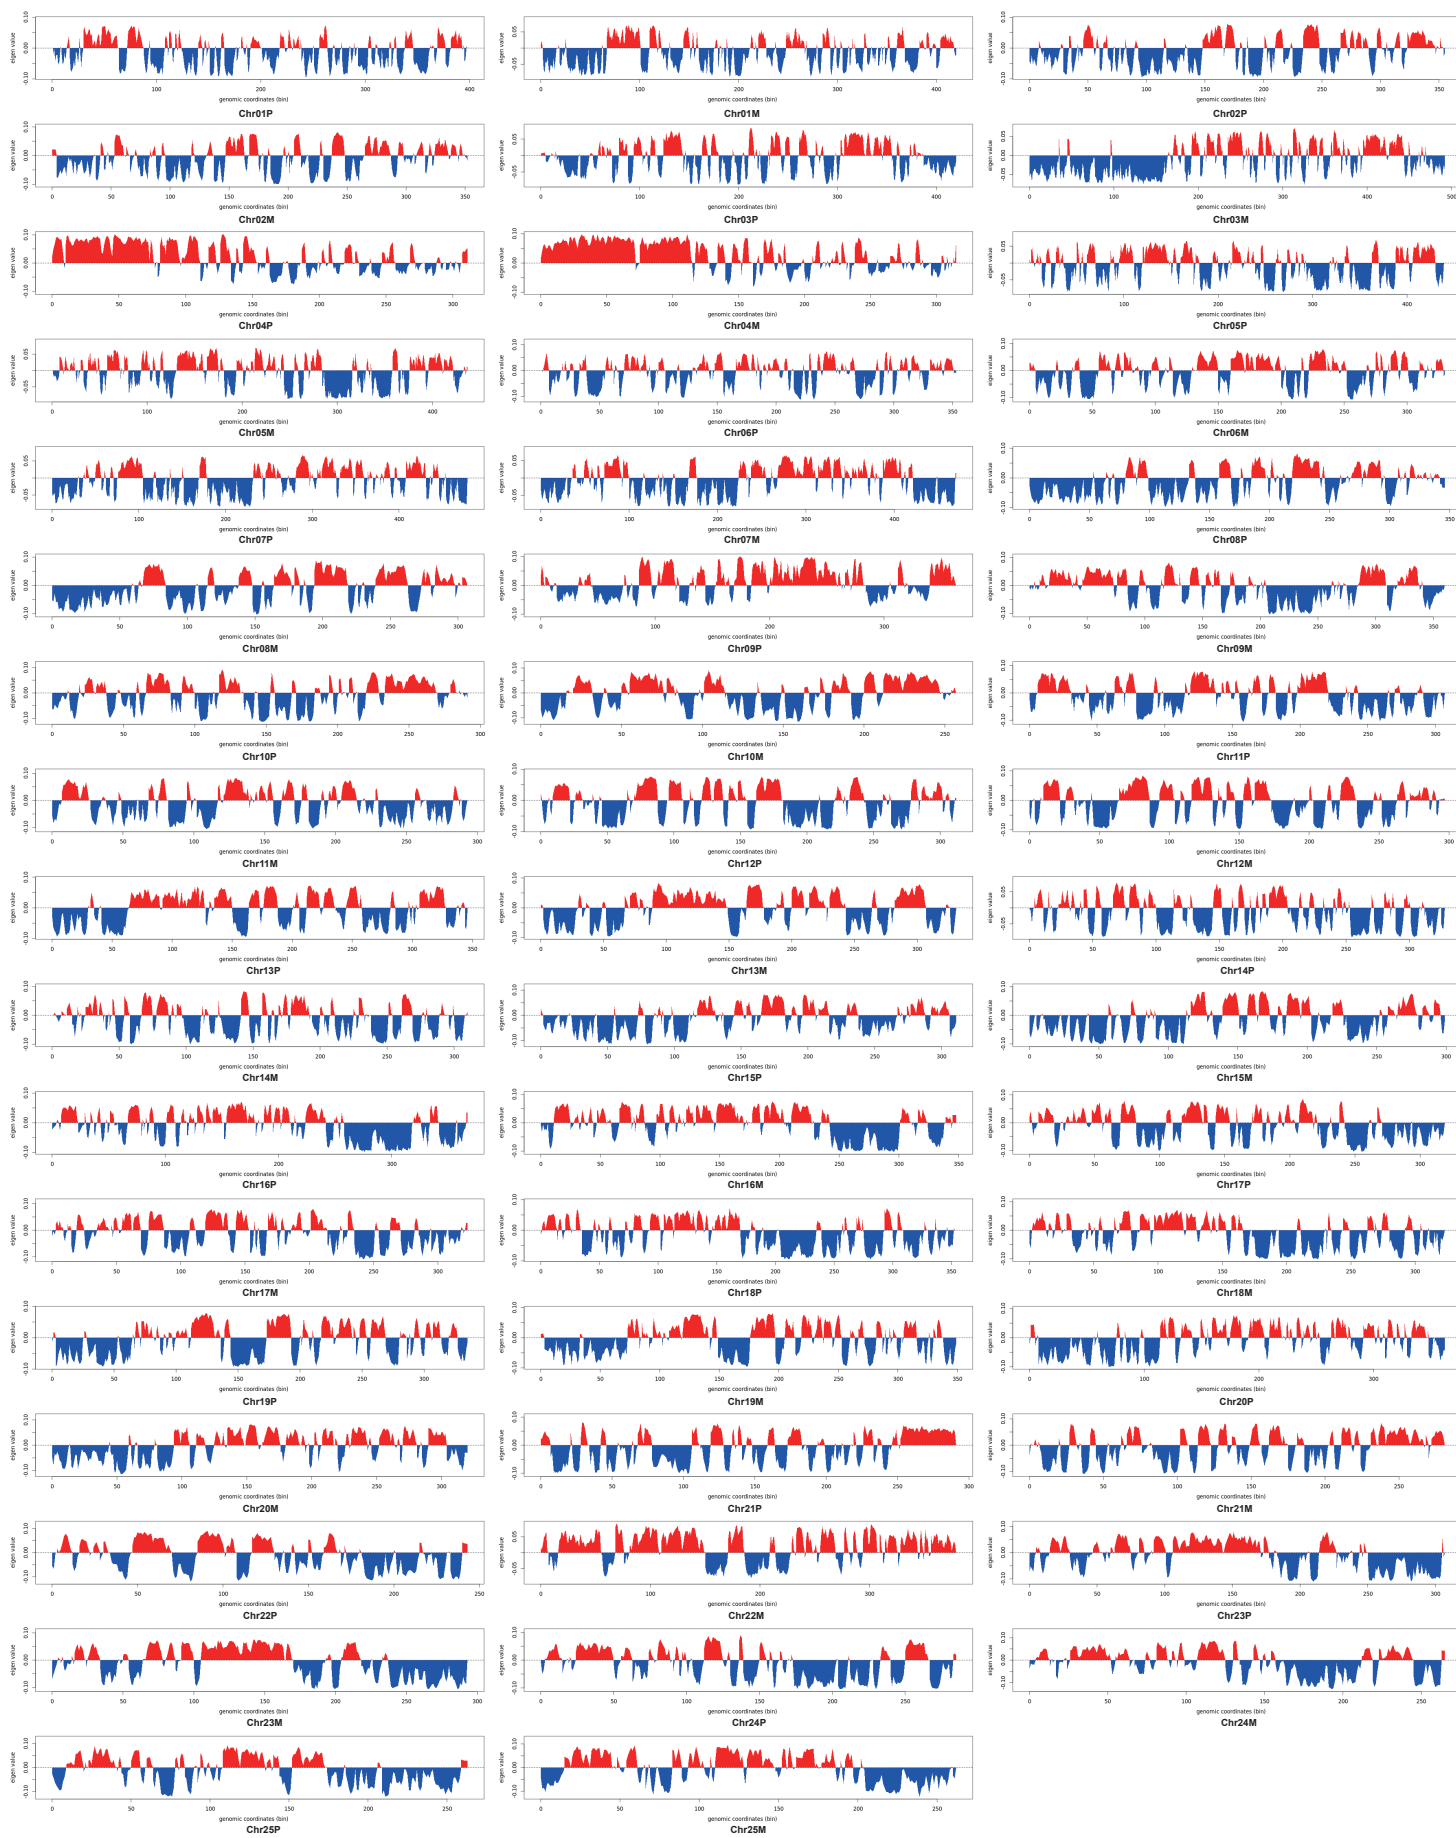

**Supplementary Fig. 48.** Global A/B compartments identified in the *L. capito* genome using the PCA-based method.

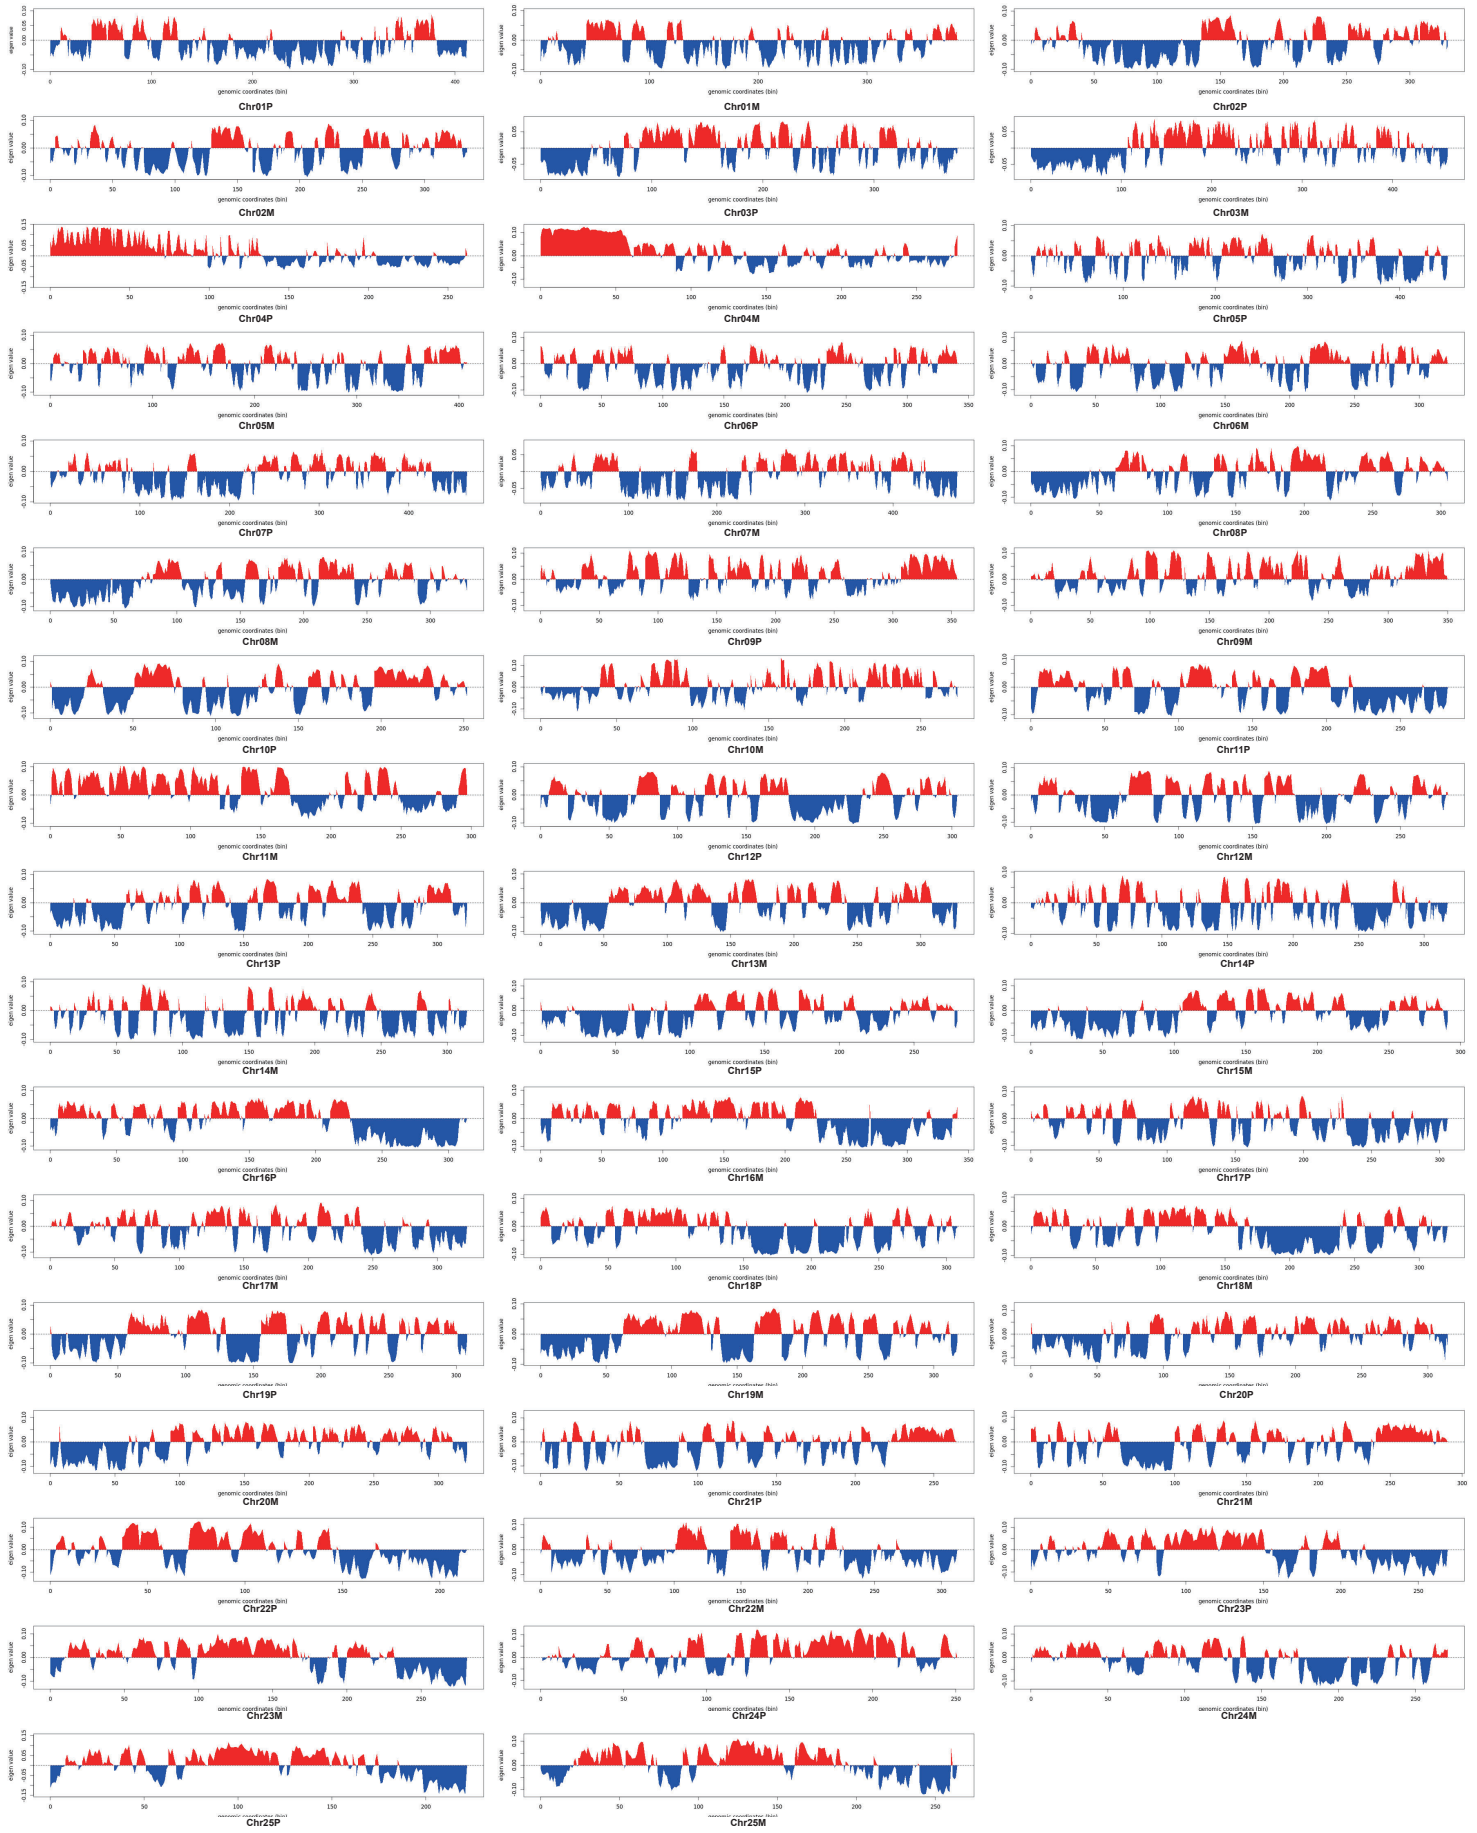

**Supplementary Fig. 49.** Global A/B compartments found in the *P. rabaudi* genome using the PCA-based method.

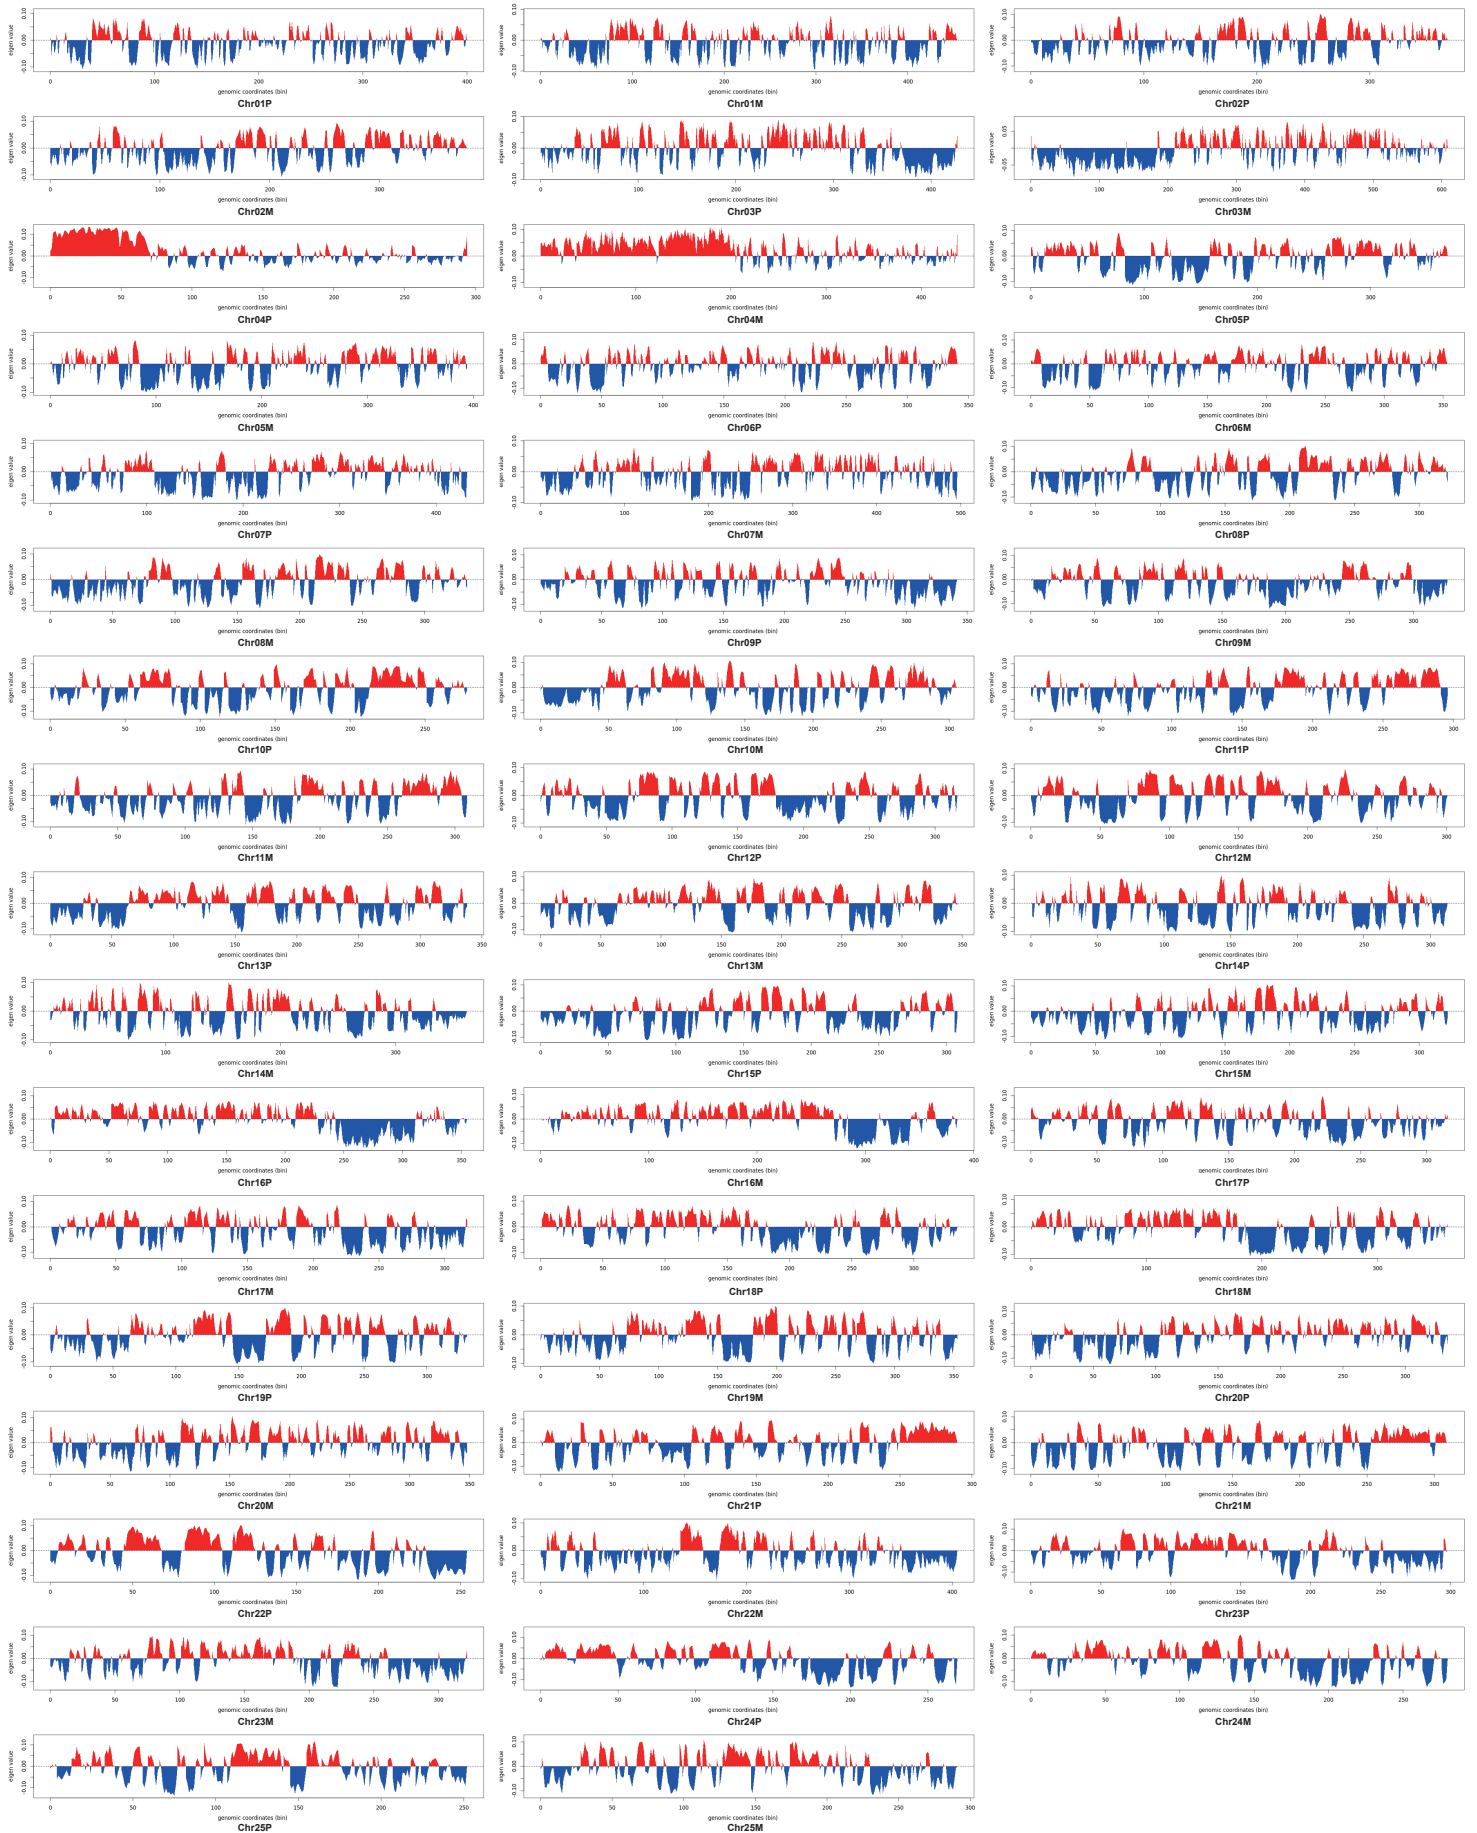

**Supplementary Fig. 50.** Global A/B compartments obtained from the *S. sinensis* genome using the PCA-based method.

**Supplementary Table 1. Detail information of sequenced species in this study.**

| Species                           | Sampling sites and Breeder                                                                          | Common name            | Artificial breeding/wild |
|-----------------------------------|-----------------------------------------------------------------------------------------------------|------------------------|--------------------------|
| <b>Xenocyprididae</b>             |                                                                                                     |                        |                          |
| <i>Zacco platypus</i>             | Liaohe River, Yingkou city, Liaoning province, China                                                | freshwater minnow      | Wild                     |
| <i>Aphyocypris chinensis</i>      | Dongjiang, Shaoxing city, Zhejiang province, China                                                  | green chub             | Wild                     |
| <i>Mylopharyngodon piceus</i>     | Longyun Aquatic Products, Kunming city, Yunnan province, China<br><b>Breeder:</b> Jian-Chao Jin     | black carp             | Artificial breeding      |
| <i>Squaliobarbus curriculus</i>   | Junda Aquatic Products, Foshang city, Guangdong province, China<br><b>Breeder:</b> Yong-Liang Zhang | barbel chub            | Artificial breeding      |
| <i>Anabarilius duoyiheensis</i>   | Duoyi River, Luoping city, Yunnan province, China                                                   | Duoyi River white fish | Wild                     |
| <i>Distoechodon tumirostris</i>   | Breeding Farm of Guyu, Liling city, Hunan province, China<br><b>Breeder:</b> Liang-Yu Peng          | round snout            | Artificial breeding      |
| <b>Tincidae</b>                   |                                                                                                     |                        |                          |
| <i>Tinca tinca</i>                | Longyun Aquatic Products, Kunming city, Yunnan province, China<br><b>Breeder:</b> Jian-Chao Jin     | tench                  | Artificial breeding      |
| <b>Gobionidae</b>                 |                                                                                                     |                        |                          |
| <i>Belligobio pengxianensis</i>   | Qingbaijiang, Chengdu city, Sichuan province, China                                                 |                        | Wild                     |
| <i>Pseudorasbora parva</i>        | Yunnan province, China                                                                              | stone moroko           | Wild                     |
| <i>Ladislavia taczanowskii</i>    | Pushi River, Dandong city, Liaoning province, China                                                 | Tachanovsky's gudgeon  | Wild                     |
| <i>Gobiobotia tungi</i>           | Qiandao Lake, Chun'an city, Zhejiang province, China                                                |                        | Wild                     |
| <i>Progobiobotia guilingensis</i> | Lijiang River, Guilin city, Guangxi province, China                                                 |                        | Wild                     |
| <b>Acheilognathidae</b>           |                                                                                                     |                        |                          |

|                                        |                                                                                                      |                        |                        |
|----------------------------------------|------------------------------------------------------------------------------------------------------|------------------------|------------------------|
| <i>Rhodeus sinensis</i>                | Taihu Lake, Huzhou city,<br>Zhejiang province, China                                                 | the Chinese bitterling | Wild                   |
| <i>Acheilognathus tonkinensis</i>      | Red River, Hechi city,<br>Guangxi province, China                                                    | the rainbow bitterling | Wild                   |
| <b>Cyprinidae</b>                      |                                                                                                      |                        |                        |
| <i>Onychostoma macrolepis</i> #        | Julong Aquatic Products,<br>Linyi city, Shandong<br>province, China<br><b>Breeder:</b> Yu-Feng Wang  |                        | Artificial<br>breeding |
| <i>Scaphiodonichthys acanthopterus</i> | Lancang River,<br>Xishuangbanna, Yunnan<br>province, China                                           |                        | Wild                   |
| <i>Crossocheilus oblongus</i>          | Borneo, Indonesia                                                                                    | Siamese flying fox     | Wild                   |
| <i>Sinilabeo rendahli</i>              | Fourth Sister Aquatic<br>Products, Chengdu city,<br>Sichuan province, China<br><b>Breeder:</b> Si He |                        | Artificial<br>breeding |
| <i>Semilabeo prochilus</i>             | Nanpan River, Xingyi<br>city, Guizhou province,<br>China                                             |                        | Wild                   |
| <i>Procypris rabaudi</i>               | Tiangui Aquaculture<br>Farm, Meishan city,<br>Sichuan province, China<br><b>Breeder:</b> Tian-Gui He | rock carp              | Artificial<br>breeding |
| <i>Spinibarbus sinensis</i>            | Tiangui Aquaculture<br>Farm, Meishan city,<br>Sichuan province, China<br><b>Breeder:</b> Tian-Gui He | qingbo                 | Artificial<br>breeding |
| <i>Luciobarbus capito</i>              | Xiaozu Aquaculture<br>Farm, Meishan city,<br>Sichuan province, China<br><b>Breeder:</b> Xiang Gao    | Aral barbel            | Artificial<br>breeding |

#Muscle of *Onychostoma macrolepis* was obtained for whole-genome bisulfite sequencing; RNA-seq sequencing of its six tissues were also performed.

**Supplementary Table 2. Summary of sequencing data for assembly of the genomes.**

| Species                  | Illumina reads   |                 |                       |                       | PacBio reads     |                 |                       |                       |
|--------------------------|------------------|-----------------|-----------------------|-----------------------|------------------|-----------------|-----------------------|-----------------------|
|                          | Insert size (bp) | Total data (Gb) | Mean read length (bp) | Sequence coverage (×) | Insert size (bp) | Total data (Gb) | Mean read length (bp) | Sequence coverage (×) |
| <i>A. tonkinensis</i>    | 350              | 54.9            | 350                   | 66.35                 | 15,000           | 33.71           | 16,189                | 40.74                 |
| <i>An. duoyiheensis</i>  | 350              | 65.9            | 350                   | 64.11                 | 15,000           | 20.15           | 16,626                | 19.60                 |
| <i>Ap. chinensis</i>     | 350              | 53.1            | 350                   | 61.13                 | 15,000           | 25.38           | 16,959                | 29.21                 |
| <i>B. pengxianensis</i>  | 350              | 57.5            | 350                   | 54.75                 | 15,000           | 39.64           | 19,675                | 37.74                 |
| <i>C. oblongus</i>       | 350              | 61.8            | 350                   | 44.46                 | 15,000           | 33.74           | 16,379                | 24.27                 |
| <i>D. tumirostris</i>    | 350              | 56.3            | 350                   | 56.88                 | 15,000           | 21.60           | 15,780                | 21.82                 |
| <i>G. tungi</i>          | 350              | 74.5            | 350                   | 92.68                 | 15,000           | 25.18           | 16,617                | 31.32                 |
| <i>La. taczanowskii</i>  | 350              | 50.5            | 350                   | 45.31                 | 15,000           | 27.15           | 15,675                | 24.36                 |
| <i>L. capito</i>         | 350              | 103.3           | 350                   | 59.73                 | 15,000           | 59.91           | 20,395                | 34.23                 |
| <i>M. piceus</i>         | 350              | 58.1            | 350                   | 65.53                 | 15,000           | 32.03           | 17,720                | 36.13                 |
| <i>Pr. guilingensis</i>  | 350              | 74.8            | 350                   | 88.83                 | 15,000           | 23.89           | 14,856                | 28.37                 |
| <i>P. rabaudi</i>        | 350              | 153.2           | 350                   | 94.96                 | 15,000           | 50.43           | 13,326                | 30.94                 |
| <i>Ps. parva</i>         | 350              | 70.6            | 350                   | 56.46                 | 15,000           | 47.00           | 16,119                | 37.59                 |
| <i>R. sinensis</i>       | 350              | 61.6            | 350                   | 71.31                 | 15,000           | 28.41           | 22,235                | 32.89                 |
| <i>Sc. acanthopterus</i> | 350              | 67.1            | 350                   | 82.82                 | 15,000           | 37.31           | 16,698                | 46.06                 |
| <i>Se. prochilus</i>     | 350              | 70.2            | 350                   | 56.26                 | 15,000           | 33.34           | 17,126                | 26.72                 |
| <i>Si. rendahli</i>      | 350              | 58.7            | 350                   | 53.30                 | 15,000           | 36.12           | 18,110                | 32.79                 |
| <i>S. sinensis</i>       | 350              | 102.8           | 350                   | 56.54                 | 15,000           | 59.38           | 16,987                | 32.37                 |
| <i>Sq. curriculum</i>    | 350              | 60.7            | 350                   | 66.62                 | 15,000           | 33.96           | 15,924                | 37.27                 |
| <i>T. tinca</i>          | 350              | 53.1            | 350                   | 53.03                 | 15,000           | 34.60           | 16,839                | 34.55                 |
| <i>Z. platypus</i>       | 350              | 92.2            | 350                   | 112.95                | 15,000           | 32.85           | 17,309                | 40.25                 |



**Supplementary Table 3. Summary of genome assemblies of twenty-one species.**

| Species                  | Title  | Total length  | Total number | Max length | Min length | N50 length | N90 length |
|--------------------------|--------|---------------|--------------|------------|------------|------------|------------|
| <i>A. tonkinensis</i>    | Contig | 852,489,282   | 269          | 32,237,854 | 4,372      | 12,201,717 | 2,717,980  |
| <i>An. duoyiheensis</i>  | Contig | 1,066,577,311 | 331          | 39,295,935 | 16,778     | 11,733,698 | 2,475,941  |
| <i>Ap. chinensis</i>     | Contig | 905,580,794   | 250          | 36,051,031 | 1,960      | 19,070,385 | 3,680,507  |
| <i>B. pengxianensis</i>  | Contig | 1,059,753,831 | 229          | 52,383,806 | 6,410      | 22,184,699 | 6,363,258  |
| <i>C. oblongus</i>       | Contig | 1,354,293,807 | 208          | 43,807,734 | 3,075      | 17,048,025 | 4,507,251  |
| <i>D. tumirostris</i>    | Contig | 1,004,000,895 | 146          | 51,452,208 | 16,617     | 34,074,188 | 11,081,630 |
| <i>G. tungi</i>          | Contig | 809,952,474   | 135          | 43,348,994 | 15,847     | 28,687,375 | 9,255,376  |
| <i>La. taczanowskii</i>  | Contig | 1,180,167,056 | 900          | 20,720,747 | 8,400      | 4,822,149  | 913,001    |
| <i>L. capito</i>         | Contig | 1,711,978,371 | 183          | 48,354,785 | 3,445      | 32,739,442 | 23,203,500 |
| <i>M. piceus</i>         | Contig | 888,063,602   | 92           | 74,811,575 | 16,615     | 33,902,650 | 26,986,539 |
| <i>Pr. guilingensis</i>  | Contig | 852,817,038   | 179          | 44,603,978 | 2,177      | 25,354,504 | 7,715,807  |
| <i>P. rabaudi</i>        | Contig | 1,642,167,810 | 572          | 33,828,682 | 11,013     | 16,097,078 | 1,958,542  |
| <i>Ps. parva</i>         | Contig | 1,273,287,385 | 268          | 33,052,391 | 16,353     | 10,622,733 | 2,740,494  |
| <i>R. sinensis</i>       | Contig | 902,936,778   | 287          | 41,811,712 | 13,121     | 27,608,729 | 4,542,592  |
| <i>Sc. acanthopterus</i> | Contig | 810,168,215   | 96           | 49,176,325 | 16,527     | 31,627,781 | 24,492,193 |
| <i>Se. prochilus</i>     | Contig | 1,323,874,878 | 355          | 41,324,975 | 2,468      | 17,175,830 | 4,186,396  |
| <i>Si. rendahli</i>      | Contig | 1,133,144,711 | 142          | 45,933,930 | 10,838     | 38,276,418 | 11,622,219 |
| <i>S. sinensis</i>       | Contig | 1,834,339,152 | 359          | 48,733,901 | 7,972      | 27,166,239 | 5,861,860  |
| <i>Sq. curriculum</i>    | Contig | 944,349,790   | 132          | 40,974,083 | 15,155     | 24,429,182 | 11,241,868 |
| <i>T. tinca</i>          | Contig | 1,017,523,531 | 176          | 55,735,399 | 8,130      | 27,533,735 | 7,401,790  |
| <i>Z. platypus</i>       | Contig | 832,640,428   | 178          | 42,058,691 | 18,959     | 23,286,023 | 6,563,167  |

**Supplementary Table 4. Estimation of the genome size using 17-mer distribution analysis.**

| Species                  | K-mer number    | Genome size (Mb) | Revised genome size (Mb) | Heterozygous rate (%) | Repeat rate (%) |
|--------------------------|-----------------|------------------|--------------------------|-----------------------|-----------------|
| <i>A. tonkinensis</i>    | 39,482,506,269  | 840.05           | 827.49                   | 0.58                  | 46.36           |
| <i>An. duoyiheensis</i>  | 53,376,760,265  | 1046.6           | 1027.89                  | 0.33                  | 54.46           |
| <i>Ap. chinensis</i>     | 42,299,190,119  | 881.23           | 868.6                    | 0.79                  | 47.73           |
| <i>B. pengxianensis</i>  | 45,796,475,485  | 1,065.03         | 1,050.31                 | 0.42                  | 55.37           |
| <i>C. oblongus</i>       | 47,836,714,168  | 1,406.96         | 1,390.07                 | 0.99                  | 61.73           |
| <i>D. tumirostris</i>    | 45,230,095,376  | 1005.11          | 989.86                   | 0.4                   | 53.43           |
| <i>G. tungi</i>          | 58,880,249,640  | 817.78           | 803.88                   | 0.41                  | 44.55           |
| <i>La. taczanowskii</i>  | 40,723,843,533  | 1,131.22         | 1,114.52                 | 0.46                  | 57.72           |
| <i>L. capito</i>         | 82,122,315,237  | 1,747.28         | 1,729.44                 | 0.26                  | 68.04           |
| <i>M. piceus</i>         | 46,740,942,556  | 898.86           | 886.59                   | 0.26                  | 50.63           |
| <i>Pr. guilingensis</i>  | 59,124,713,573  | 856.88           | 842.08                   | 0.62                  | 45.75           |
| <i>P. rabaudi</i>        | 120,715,983,953 | 1,631.30         | 1,613.34                 | 0.38                  | 60.31           |
| <i>Ps. parva</i>         | 55,733,836,016  | 1,266.68         | 1,250.34                 | 0.64                  | 59.31           |
| <i>R. sinensis</i>       | 49,081,886,650  | 876.46           | 863.85                   | 0.93                  | 47.4            |
| <i>Sc. acanthopterus</i> | 47,860,751,637  | 825.19           | 813.63                   | 0.33                  | 46.3            |
| <i>Se. prochilus</i>     | 54,482,247,533  | 1,267.03         | 1,247.84                 | 0.4                   | 61.7            |
| <i>Si. rendahli</i>      | 45,906,630,802  | 1,119.67         | 1,101.28                 | 0.36                  | 58.07           |
| <i>S. sinensis</i>       | 82,695,020,082  | 1,837.67         | 1,818.34                 | 0.48                  | 66.05           |
| <i>Sq. curriculum</i>    | 48,049,248,202  | 924.02           | 911.18                   | 0.54                  | 50.01           |
| <i>T. tinca</i>          | 42,700,330,212  | 1,016.67         | 1,001.39                 | 0.49                  | 54.05           |
| <i>Z. platypus</i>       | 73,512,184,785  | 825.98           | 816.26                   | 0.59                  | 45.43           |

**Supplementary Table 5. BUSCO evaluation of the completeness and accuracy of the genomes.**

| Species                  | Complete BUSCOs (%) | Complete and single-copy BUSCOs (%) | Complete and duplicated BUSCOs (%) | Fragmented BUSCOs (%) | Missing BUSCOs (%) | Total number of BUSCOs |
|--------------------------|---------------------|-------------------------------------|------------------------------------|-----------------------|--------------------|------------------------|
| <i>A. tonkinensis</i>    | 95.90%              | 91.20%                              | 4.70%                              | 1.90%                 | 2.20%              | 4584                   |
| <i>An. duoyiheensis</i>  | 95.70%              | 91.10%                              | 4.60%                              | 2.10%                 | 2.20%              | 4584                   |
| <i>Ap. chinensis</i>     | 95.60%              | 90.00%                              | 5.60%                              | 2.10%                 | 2.30%              | 4584                   |
| <i>B. pengxianensis</i>  | 95.70%              | 91.90%                              | 3.80%                              | 2.10%                 | 2.20%              | 4584                   |
| <i>C. oblongus</i>       | 95.70%              | 92.10%                              | 3.60%                              | 2.00%                 | 2.30%              | 4584                   |
| <i>D. tumirostris</i>    | 95.90%              | 91.40%                              | 4.50%                              | 2.10%                 | 2.00%              | 4584                   |
| <i>G. tungi</i>          | 95.30%              | 90.90%                              | 4.40%                              | 2.20%                 | 2.50%              | 4584                   |
| <i>La. taczanowskii</i>  | 94.40%              | 89.00%                              | 5.40%                              | 2.70%                 | 2.90%              | 4584                   |
| <i>L. capito</i>         | 96.60%              | 24.90%                              | 71.70%                             | 1.10%                 | 2.30%              | 4584                   |
| <i>M. piceus</i>         | 96.00%              | 92.30%                              | 3.70%                              | 2.00%                 | 2.00%              | 4584                   |
| <i>Pr. guilingensis</i>  | 95.50%              | 91.30%                              | 4.20%                              | 2.10%                 | 2.40%              | 4584                   |
| <i>P. rabaudi</i>        | 96.50%              | 31.90%                              | 64.60%                             | 1.40%                 | 2.10%              | 4584                   |
| <i>Ps. parva</i>         | 94.80%              | 90.70%                              | 4.10%                              | 2.40%                 | 2.80%              | 4584                   |
| <i>R. sinensis</i>       | 95.70%              | 90.40%                              | 5.30%                              | 2.10%                 | 2.20%              | 4584                   |
| <i>Sc. acanthopterus</i> | 96.20%              | 92.40%                              | 3.80%                              | 1.70%                 | 2.10%              | 4584                   |
| <i>Se. prochilus</i>     | 95.70%              | 91.90%                              | 3.80%                              | 2.30%                 | 2.00%              | 4584                   |
| <i>Si. rendahli</i>      | 96.00%              | 91.90%                              | 4.10%                              | 1.80%                 | 2.20%              | 4584                   |
| <i>S. sinensis</i>       | 96.60%              | 24.50%                              | 72.10%                             | 1.10%                 | 2.30%              | 4584                   |
| <i>Sq. curriculum</i>    | 95.80%              | 90.60%                              | 5.20%                              | 1.90%                 | 2.30%              | 4584                   |
| <i>T. tinca</i>          | 95.80%              | 91.80%                              | 4.00%                              | 1.90%                 | 2.30%              | 4584                   |
| <i>Z. platypus</i>       | 95.90%              | 91.30%                              | 4.60%                              | 2.10%                 | 2.00%              | 4584                   |

**Supplementary Table 6. Statistics of Hi-C mapping of the *S. sinensis* genome.**

---

|                                         |             |
|-----------------------------------------|-------------|
| Clean Paired-end Reads                  | 511,202,827 |
| Unmapped pairs-end Reads                | 20,288,335  |
| Unmapped pairs-end Reads Rate (%)       | 3.969       |
| Pairs-end Reads with singleton          | 126,649,959 |
| Pairs-end Reads with singleton Rate (%) | 24.775      |
| Multi Mapped pairs-end Reads            | 0           |
| Multi Mapped Ratio (%)                  | 0           |
| Unique Mapped paired-end Reads          | 192,162,529 |
| Unique Mapped paired-end Reads Rate (%) | 37.59       |

---

**Statistics of valid reads**

---

|                                |             |
|--------------------------------|-------------|
| Unique Mapped Paired-end Reads | 192,162,529 |
| Dangling End Pair-end Reads    | 69,106,617  |
| Dangling End. Rate (%)         | 35.962      |
| Self Circle Paired-end Reads   | 1,316,086   |
| Self Circle Rate (%)           | 0.685       |
| Dumped Paired-end Reads        | 130,738     |
| Dumped Rate (%)                | 0.068       |
| Interaction Paired-end Reads   | 98,259,877  |
| Interaction Rate(%)            | 51.134      |
| Lib Valid Paired-end Reads     | 67,349,935  |
| Lib valid Rate (%)             | 68.543      |
| Lib Dup (%)                    | 31.457      |

---

**Supplementary Table 7. Statistics of Hi-C mapping of the *L. capito* genome.**

|                                        |             |
|----------------------------------------|-------------|
| Clean Paired-end Reads                 | 530,105,378 |
| Unmapped pairs-end Reads               | 13,182,640  |
| Unmapped pairs-end Reads Rate(%)       | 2.487       |
| Pairs-end Reads with singleton         | 66,420,608  |
| Pairs-end Reads with singleton Rate(%) | 12.53       |
| Multi Mapped pairs-end Reads           | 0           |
| Multi Mapped Ratio(%)                  | 0           |
| Unique Mapped paired-end Reads         | 222,495,670 |
| Unique Mapped paired-end Reads         | 41.972      |
| <hr/>                                  |             |
| <b>Statistics of valid reads</b>       |             |
| Unique Mapped Paired-end Reads         | 222,495,670 |
| Dangling End Pair-end Reads            | 30,382,857  |
| Dangling End. Rate(%)                  | 13.655      |
| Self Circle Paired-end Reads           | 2,215,387   |
| Self Circle Rate(%)                    | 0.995       |
| Dumped Paired-end Reads                | 50,048      |
| Dumped Rate(%)                         | 0.022       |
| Interaction Paired-end Reads           | 174,876,480 |
| Interaction Rate(%)                    | 78.598      |
| Lib Valid Paired-end Reads             | 123,501,434 |
| Lib valid Rate(%)                      | 70.622      |
| Lib Dup(%)                             | 29.378      |

**Supplementary Table 8. Statistics of Hi-C mapping of the *P. rabaudi* genome.**

---

|                                        |             |
|----------------------------------------|-------------|
| Clean Paired-end Reads                 | 587,620,065 |
| Unmapped pairs-end Reads               | 12,526,620  |
| Unmapped pairs-end Reads Rate(%)       | 2.132       |
| Pairs-end Reads with singleton         | 79,239,660  |
| Pairs-end Reads with singleton Rate(%) | 13.485      |
| Multi Mapped pairs-end Reads           | 0           |
| Multi Mapped Ratio(%)                  | 0           |
| Unique Mapped paired-end Reads         | 273,052,557 |
| Unique Mapped paired-end Reads         | 46.468      |
| <hr/>                                  |             |
| Statistics of valid reads              |             |
| Unique Mapped Paired-end Reads         | 273,052,557 |
| Dangling End Pair-end Reads            | 39,287,331  |
| Dangling End. Rate(%)                  | 14.388      |
| Self Circle Paired-end Reads           | 1,714,916   |
| Self Circle Rate(%)                    | 0.628       |
| Dumped Paired-end Reads                | 59,778      |
| Dumped Rate(%)                         | 0.021       |
| Interaction Paired-end Reads           | 212,518,334 |
| Interaction Rate(%)                    | 77.83       |
| Lib Valid Paired-end Reads             | 151,997,863 |
| Lib valid Rate(%)                      | 71.522      |
| Lib Dup(%)                             | 28.478      |

---

**Supplementary Table 9. Statistical data of 50 chromosomes of *S. sinensis* .**

| ChrID  | Anchored | ctg Length (bp) | Gene number | ChrID  | Anchored | ctg Length (bp) | Gene number |
|--------|----------|-----------------|-------------|--------|----------|-----------------|-------------|
| Chr01P | 25       | 40,048,438      | 1,134       | Chr13M | 9        | 34,622,671      | 913         |
| Chr01M | 66       | 45,400,670      | 1,232       | Chr14P | 3        | 31,327,747      | 844         |
| Chr02P | 58       | 36,983,292      | 1,109       | Chr14M | 88       | 36,262,177      | 915         |
| Chr02M | 78       | 38,086,976      | 1,165       | Chr15P | 25       | 30,892,536      | 854         |
| Chr03P | 90       | 42,702,752      | 1,286       | Chr15M | 23       | 32,281,118      | 862         |
| Chr03M | 105      | 60,952,779      | 1,809       | Chr16P | 81       | 35,579,278      | 1,054       |
| Chr04P | 16       | 29,456,046      | 828         | Chr16M | 50       | 38,558,027      | 1,121       |
| Chr04M | 90       | 43,812,607      | 1,196       | Chr17P | 48       | 31,617,493      | 856         |
| Chr05P | 53       | 36,844,798      | 1,095       | Chr17M | 14       | 31,795,286      | 861         |
| Chr05M | 38       | 39,430,148      | 1,105       | Chr18P | 40       | 33,530,787      | 804         |
| Chr06P | 8        | 34,116,691      | 986         | Chr18M | 13       | 36,111,743      | 796         |
| Chr06M | 58       | 35,411,886      | 965         | Chr19P | 36       | 33,280,341      | 953         |
| Chr07P | 55       | 43,249,945      | 1,079       | Chr19M | 52       | 35,306,529      | 999         |
| Chr07M | 18       | 49,662,784      | 1,293       | Chr20P | 52       | 33,404,830      | 965         |
| Chr08P | 2        | 32,288,098      | 1,011       | Chr20M | 43       | 34,891,650      | 949         |
| Chr08M | 42       | 33,452,449      | 1,022       | Chr21P | 40       | 29,010,266      | 856         |
| Chr09P | 78       | 34,259,335      | 856         | Chr21M | 24       | 31,024,171      | 914         |
| Chr09M | 14       | 32,737,962      | 808         | Chr22P | 75       | 25,448,094      | 688         |
| Chr10P | 32       | 27,862,358      | 868         | Chr22M | 108      | 40,516,179      | 914         |
| Chr10M | 33       | 30,630,240      | 885         | Chr23P | 80       | 29,863,141      | 904         |
| Chr11P | 25       | 29,617,316      | 845         | Chr23M | 36       | 32,222,432      | 933         |
| Chr11M | 32       | 30,973,789      | 812         | Chr24P | 20       | 26,988,831      | 746         |
| Chr12P | 15       | 31,797,855      | 836         | Chr24M | 10       | 28,009,647      | 779         |
| Chr12M | 45       | 30,117,390      | 845         | Chr25P | 50       | 25,256,613      | 780         |
| Chr13P | 21       | 33,838,460      | 932         | Chr25M | 68       | 29,159,053      | 905         |

Total number of contigs: 4,343

Total length of contigs (bp): 1,834,334,809

Total number of anchored contigs: 2,185

Total length of chromosome level assembly (bp): 1,730,695,704

Number of unanchored contigs: 2,158

Length of unanchored contigs (bp): 103,852,605

Anchor rate (%): 94.34

**Supplementary Table 10. Statistical data of 50 chromosomes of *P. rabaudi*.**

| ChrID  | Anchored | ctg | Length (bp) | Gene number | ChrID  | Anchored | ctg | Length (bp) | Gene number |
|--------|----------|-----|-------------|-------------|--------|----------|-----|-------------|-------------|
| Chr01P | 185      |     | 41,274,036  | 1,090       | Chr13M | 70       |     | 32,931,668  | 889         |
| Chr01M | 100      |     | 38,395,085  | 1,078       | Chr14P | 54       |     | 31,878,092  | 819         |
| Chr02P | 72       |     | 33,036,141  | 992         | Chr14M | 77       |     | 31,537,492  | 808         |
| Chr02M | 43       |     | 33,477,915  | 1,046       | Chr15P | 58       |     | 27,993,769  | 785         |
| Chr03P | 134      |     | 37,586,275  | 1,192       | Chr15M | 51       |     | 29,127,640  | 821         |
| Chr03M | 134      |     | 46,173,982  | 1,335       | Chr16P | 41       |     | 31,404,537  | 939         |
| Chr04P | 54       |     | 26,277,941  | 757         | Chr16M | 65       |     | 34,187,610  | 1,032       |
| Chr04M | 22       |     | 27,730,151  | 757         | Chr17P | 38       |     | 30,697,880  | 821         |
| Chr05P | 60       |     | 45,221,023  | 1,261       | Chr17M | 50       |     | 32,333,807  | 870         |
| Chr05M | 53       |     | 40,831,580  | 1,242       | Chr18P | 44       |     | 30,811,384  | 746         |
| Chr06P | 55       |     | 34,116,527  | 953         | Chr18M | 25       |     | 32,208,807  | 782         |
| Chr06M | 52       |     | 32,292,431  | 898         | Chr19P | 94       |     | 30,844,295  | 888         |
| Chr07P | 101      |     | 46,598,033  | 1,217       | Chr19M | 73       |     | 31,834,130  | 892         |
| Chr07M | 52       |     | 47,302,989  | 1,201       | Chr20P | 75       |     | 31,590,913  | 884         |
| Chr08P | 60       |     | 30,561,774  | 922         | Chr20M | 32       |     | 32,252,527  | 887         |
| Chr08M | 53       |     | 32,924,569  | 962         | Chr21P | 22       |     | 26,522,369  | 825         |
| Chr09P | 82       |     | 35,593,557  | 845         | Chr21M | 29       |     | 29,063,070  | 888         |
| Chr09M | 66       |     | 35,043,038  | 844         | Chr22P | 75       |     | 21,424,517  | 631         |
| Chr10P | 35       |     | 25,278,516  | 786         | Chr22M | 126      |     | 31,295,962  | 724         |
| Chr10M | 73       |     | 27,482,011  | 793         | Chr23P | 74       |     | 26,945,570  | 805         |
| Chr11P | 70       |     | 28,208,994  | 759         | Chr23M | 127      |     | 28,155,753  | 861         |
| Chr11M | 86       |     | 29,794,645  | 809         | Chr24P | 32       |     | 25,185,387  | 670         |
| Chr12P | 61       |     | 30,469,296  | 832         | Chr24M | 28       |     | 27,198,397  | 705         |
| Chr12M | 29       |     | 28,206,806  | 750         | Chr25P | 55       |     | 22,243,253  | 718         |
| Chr13P | 37       |     | 32,348,885  | 882         | Chr25M | 116      |     | 26,462,806  | 759         |

Total number of contigs: 4,866

Total length of contigs (bp): 1,642,162,944

Total number of anchored contigs: 3,300

Total length of chromosome level assembly (bp): 1,602,357,835

Number of unanchored contigs: 1,566

Length of unanchored contigs (bp): 4,0130,109

Anchor rate (%): 97.56



**Supplementary Table 11. Statistical data of 50 chromosomes of *L. capito* .**

| ChrID  | Anchored | ctg | Length (bp) | Gene number | ChrID  | Anchored | ctg | Length (bp) | Gene number |
|--------|----------|-----|-------------|-------------|--------|----------|-----|-------------|-------------|
| Chr01P | 20       |     | 39,835,672  | 956         | Chr13M | 33       |     | 33,114,635  | 814         |
| Chr01M | 50       |     | 42,091,401  | 1045        | Chr14P | 5        |     | 32,886,395  | 750         |
| Chr02P | 6        |     | 35,565,493  | 984         | Chr14M | 15       |     | 31,004,809  | 754         |
| Chr02M | 24       |     | 35,208,143  | 1,061       | Chr15P | 37       |     | 31,107,464  | 720         |
| Chr03P | 117      |     | 42,086,565  | 1,126       | Chr15M | 10       |     | 29,997,890  | 774         |
| Chr03M | 192      |     | 49,215,915  | 1,399       | Chr16P | 21       |     | 36,763,600  | 912         |
| Chr04P | 30       |     | 31,191,941  | 828         | Chr16M | 23       |     | 34,809,537  | 990         |
| Chr04M | 40       |     | 31,532,706  | 817         | Chr17P | 6        |     | 31,951,494  | 781         |
| Chr05P | 25       |     | 44,041,910  | 1,121       | Chr17M | 59       |     | 32,300,712  | 831         |
| Chr05M | 61       |     | 43,713,097  | 1,190       | Chr18P | 19       |     | 35,492,216  | 691         |
| Chr06P | 12       |     | 35,322,922  | 902         | Chr18M | 18       |     | 32,333,262  | 728         |
| Chr06M | 4        |     | 33,025,491  | 914         | Chr19P | 18       |     | 33,581,297  | 837         |
| Chr07P | 10       |     | 47,916,889  | 1,096       | Chr19M | 28       |     | 34,958,156  | 943         |
| Chr07M | 21       |     | 47,072,773  | 1,146       | Chr20P | 26       |     | 36,247,472  | 875         |
| Chr08P | 35       |     | 34,635,988  | 914         | Chr20M | 36       |     | 32,042,907  | 882         |
| Chr08M | 12       |     | 30,761,087  | 864         | Chr21P | 20       |     | 29,153,082  | 781         |
| Chr09P | 15       |     | 36,394,676  | 750         | Chr21M | 19       |     | 28,159,712  | 789         |
| Chr09M | 46       |     | 36,030,262  | 841         | Chr22P | 21       |     | 24,330,971  | 598         |
| Chr10P | 17       |     | 29,106,581  | 755         | Chr22M | 67       |     | 37,928,011  | 846         |
| Chr10M | 19       |     | 25,709,912  | 790         | Chr23P | 19       |     | 30,762,945  | 782         |
| Chr11P | 37       |     | 30,759,062  | 713         | Chr23M | 15       |     | 29,349,384  | 834         |
| Chr11M | 42       |     | 29,330,057  | 720         | Chr24P | 16       |     | 28,514,483  | 643         |
| Chr12P | 31       |     | 31,293,265  | 750         | Chr24M | 14       |     | 26,597,859  | 671         |
| Chr12M | 32       |     | 29,716,698  | 756         | Chr25P | 29       |     | 26,367,322  | 724         |
| Chr13P | 30       |     | 34,633,884  | 771         | Chr25M | 19       |     | 26,203,567  | 731         |

Total number of contigs: 2,143

Total length of contigs (bp): 1,711,976,228

Total number of anchored contigs: 1,521

Total length of chromosome level assembly (bp): 1,692,151,572

Number of unanchored contigs: 622

Length of unanchored contigs (bp): 19,971,756

Anchor rate (%): 98.83

**Supplementary Table 12. BUSCO evaluation of gene completeness from the assembly genomes.**

| Species                  | Complete BUSCOs (%) | Complete and single-copy BUSCOs (%) | Complete and duplicated BUSCOs (%) | Fragmented BUSCOs (%) | Missing BUSCOs (%) | Total number of BUSCOs |
|--------------------------|---------------------|-------------------------------------|------------------------------------|-----------------------|--------------------|------------------------|
| <i>A. tonkinensis</i>    | 89.7%               | 84.1%                               | 5.6%                               | 5.2%                  | 5.1%               | 4584                   |
| <i>An. duoyiheensis</i>  | 96.7%               | 90.3%                               | 6.4%                               | 2.0%                  | 1.3%               | 4584                   |
| <i>Ap. chinensis</i>     | 91.5%               | 84.4%                               | 7.1%                               | 4.0%                  | 4.5%               | 4584                   |
| <i>B. pengxianensis</i>  | 87.4%               | 81.5%                               | 5.9%                               | 5.6%                  | 7.0%               | 4584                   |
| <i>C. oblongus</i>       | 90.0%               | 84.6%                               | 5.4%                               | 3.7%                  | 6.3%               | 4584                   |
| <i>D. tumirostris</i>    | 93.0%               | 87.2%                               | 5.8%                               | 3.6%                  | 3.4%               | 4584                   |
| <i>G. tungi</i>          | 95.1%               | 89.4%                               | 5.7%                               | 3.1%                  | 1.8%               | 4584                   |
| <i>La. taczanowskii</i>  | 87.6%               | 81.0%                               | 6.6%                               | 5.5%                  | 6.9%               | 4584                   |
| <i>L. capito</i>         | 92.6%               | 33.4%                               | 59.2%                              | 3.7%                  | 3.7%               | 4584                   |
| <i>M. piceus</i>         | 92.8%               | 87.1%                               | 5.7%                               | 4.2%                  | 3.0%               | 4584                   |
| <i>Pr. guilingensis</i>  | 96.1%               | 89.5%                               | 6.6%                               | 2.3%                  | 1.6%               | 4584                   |
| <i>P. rabaudi</i>        | 94.4%               | 31.4%                               | 63.0%                              | 2.9%                  | 2.7%               | 4584                   |
| <i>Ps. parva</i>         | 88.6%               | 83.0%                               | 5.6%                               | 3.5%                  | 7.9%               | 4584                   |
| <i>R. sinensis</i>       | 89.9%               | 83.7%                               | 6.2%                               | 5.0%                  | 5.1%               | 4584                   |
| <i>Sc. acanthopterus</i> | 92.3%               | 86.7%                               | 5.6%                               | 4.0%                  | 3.7%               | 4584                   |
| <i>Se. prochilus</i>     | 89.0%               | 83.5%                               | 5.5%                               | 4.5%                  | 6.5%               | 4584                   |
| <i>Si. rendahli</i>      | 88.4%               | 83.0%                               | 5.4%                               | 5.1%                  | 6.5%               | 4584                   |
| <i>S. sinensis</i>       | 95.6%               | 23.4%                               | 72.2%                              | 2.5%                  | 1.9%               | 4584                   |
| <i>Sq. curriculum</i>    | 92.5%               | 85.7%                               | 6.8%                               | 4.0%                  | 3.5%               | 4584                   |
| <i>T. tinca</i>          | 88.7%               | 83.2%                               | 5.5%                               | 4.8%                  | 6.5%               | 4584                   |
| <i>Z. platypus</i>       | 92.1%               | 85.9%                               | 6.2%                               | 4.1%                  | 3.8%               | 4584                   |

**Supplementary Table 13. Characteristics of transposable element identified in the assembled genomes.**

| Species                  | DNA    | LTR    | LINE  | SINE  | RC/Helitron | Unknown | Total (%) |
|--------------------------|--------|--------|-------|-------|-------------|---------|-----------|
| <i>A. tonkinensis</i>    | 17.03  | 15.01  | 4.133 | 1.231 | 4.834       | 1.454   | 43.692    |
| <i>An. duoyiheensis</i>  | 31.314 | 10.535 | 3.7   | 0.751 | 3.271       | 1.912   | 51.483    |
| <i>Ap. chinensis</i>     | 22.617 | 13.789 | 4.693 | 1.241 | 2.943       | 1.367   | 46.65     |
| <i>B. pengxianensis</i>  | 29.771 | 12.071 | 4.804 | 1.493 | 1.575       | 2.087   | 51.801    |
| <i>C. oblongus</i>       | 37.807 | 11.668 | 3.383 | 0.407 | 4.544       | 1.366   | 59.175    |
| <i>D. tumirostris</i>    | 30.539 | 10.684 | 2.866 | 0.24  | 1.958       | 2.32    | 48.607    |
| <i>G. tungi</i>          | 29.188 | 7.236  | 2.436 | 0.467 | 2.144       | 2.738   | 44.209    |
| <i>La. taczanowskii</i>  | 34.55  | 11.5   | 4.005 | 0.803 | 3.155       | 1.654   | 55.667    |
| <i>L. capito</i>         | 23.232 | 11.989 | 4.791 | 0.418 | 1.836       | 0.805   | 43.071    |
| <i>M. piceus</i>         | 31.149 | 8.096  | 2.986 | 0.446 | 2.245       | 1.27    | 46.192    |
| <i>Pr. guilingensis</i>  | 28.569 | 9.299  | 3.222 | 0.515 | 2.157       | 2.387   | 46.149    |
| <i>P. rabaudi</i>        | 25.923 | 10.219 | 5.234 | 0.203 | 1.097       | 1.224   | 43.9      |
| <i>Ps. parva</i>         | 33.99  | 14.18  | 3.56  | 0.36  | 2.99        | 1.8     | 56.88     |
| <i>R. sinensis</i>       | 18.225 | 14.831 | 4.849 | 1.804 | 3.605       | 1.6     | 44.914    |
| <i>Sc. acanthopterus</i> | 25.343 | 7.112  | 4.814 | 0.621 | 1.61        | 1.369   | 40.869    |
| <i>Se. prochilus</i>     | 33.911 | 10.847 | 3.678 | 3.422 | 2.066       | 0.947   | 54.871    |
| <i>Si. rendahli</i>      | 33.763 | 10.563 | 3.692 | 1.121 | 2.551       | 0.911   | 52.601    |
| <i>S. sinensis</i>       | 27.085 | 8.548  | 5.301 | 0.284 | 3.989       | 1.075   | 46.282    |
| <i>Sq. curriculum</i>    | 30.722 | 9.395  | 3.148 | 0.348 | 2           | 1.409   | 47.022    |
| <i>T. tinca</i>          | 24.912 | 15.262 | 5.16  | 0.482 | 1.593       | 2.693   | 50.102    |
| <i>Z. platypus</i>       | 28.065 | 9.291  | 3.703 | 0.287 | 2.171       | 1.277   | 44.794    |

**Supplementary Table 14. Transposable elements that are subgenome biased in the three allotetraploids.**

|                    | TE               | SBI  | num.P>M | num.P<M | num.P=M |
|--------------------|------------------|------|---------|---------|---------|
| <i>L. capito</i>   | L1-128_DR        | 0.73 | 25      | 0       | 0       |
|                    | DNAX-18_DR       | 0.72 | 1       | 24      | 0       |
|                    | Mariner-4_DR     | 0.58 | 0       | 25      | 0       |
|                    | DNA-4-2_DR       | 0.55 | 1       | 23      | 1       |
|                    | hAT-N120_DR      | 0.54 | 24      | 1       | 0       |
|                    | L1-112_DR        | 0.52 | 24      | 1       | 0       |
|                    | TC1DR3           | 0.49 | 25      | 0       | 0       |
|                    | hAT-N191_DR      | 0.46 | 25      | 0       | 0       |
| <i>P. rabaudi</i>  | TC1DR2           | 0.95 | 0       | 25      | 0       |
|                    | Mariner-12_DR    | 0.90 | 25      | 0       | 0       |
|                    | Mariner-N17_DR   | 0.88 | 24      | 0       | 1       |
|                    | HATN5_DR         | 0.86 | 0       | 25      | 0       |
|                    | DNA-2-19_DR      | 0.83 | 0       | 25      | 0       |
|                    | hAT-21_DR        | 0.79 | 0       | 25      | 0       |
|                    | DNA-X-8_DR       | 0.78 | 0       | 25      | 0       |
|                    | Tc1-7_DR         | 0.77 | 0       | 25      | 0       |
|                    | Tc1-8B_DR        | 0.75 | 0       | 25      | 0       |
|                    | Mariner-N34_DR   | 0.75 | 0       | 25      | 0       |
|                    | Tc1-8_DR         | 0.70 | 0       | 25      | 0       |
|                    | hAT-30_DR        | 0.69 | 24      | 0       | 1       |
|                    | piggyBac-N22_DR  | 0.63 | 24      | 1       | 0       |
|                    | hAT-N91_DR       | 0.57 | 0       | 25      | 0       |
|                    | EnSpm-N16_DR     | 0.56 | 0       | 24      | 1       |
|                    | SAT-27_DR        | 0.55 | 0       | 25      | 0       |
| <i>S. sinensis</i> | TDR13B           | 0.97 | 25      | 0       | 0       |
|                    | TDR13C           | 0.92 | 25      | 0       | 0       |
|                    | Mariner-17_DR    | 0.89 | 0       | 25      | 0       |
|                    | LOOPERN4_DR      | 0.69 | 0       | 25      | 0       |
|                    | Gypsy-235_DR-LTR | 0.63 | 0       | 25      | 0       |
|                    | DNA-X-6_DR       | 0.63 | 0       | 25      | 0       |
|                    | Kolobok-N17_DR   | 0.63 | 0       | 25      | 0       |
|                    | Mariner-N34_DR   | 0.56 | 0       | 25      | 0       |
|                    | TC1DR2           | 0.51 | 0       | 25      | 0       |
| Kolobok-1N1_DR     | 0.47             | 0    | 25      | 0       |         |

**Supplementary Table 15. Number of ohnolog clusters in evolutionary fate categories.**

|           | Diploid ancestors        | Allotetraploids    | Count |
|-----------|--------------------------|--------------------|-------|
|           | <i>O. macrolepis</i>     | <i>L. capito</i>   | 272   |
|           | <i>O. macrolepis</i>     | <i>P. rabaudi</i>  | 420   |
| neoF      | <i>O. macrolepis</i>     | <i>S. sinensis</i> | 329   |
|           | <i>Sc. acanthopterus</i> | <i>L. capito</i>   | 223   |
|           | <i>Sc. acanthopterus</i> | <i>P. rabaudi</i>  | 356   |
|           | <i>Sc. acanthopterus</i> | <i>S. sinensis</i> | 229   |
|           | <i>O. macrolepis</i>     | <i>L. capito</i>   | 226   |
|           | <i>O. macrolepis</i>     | <i>P. rabaudi</i>  | 333   |
| nonF      | <i>O. macrolepis</i>     | <i>S. sinensis</i> | 233   |
|           | <i>Sc. acanthopterus</i> | <i>L. capito</i>   | 245   |
|           | <i>Sc. acanthopterus</i> | <i>P. rabaudi</i>  | 348   |
|           | <i>Sc. acanthopterus</i> | <i>S. sinensis</i> | 262   |
|           | <i>O. macrolepis</i>     | <i>L. capito</i>   | 4     |
|           | <i>O. macrolepis</i>     | <i>P. rabaudi</i>  | 14    |
| subF      | <i>O. macrolepis</i>     | <i>S. sinensis</i> | 9     |
|           | <i>Sc. acanthopterus</i> | <i>L. capito</i>   | 14    |
|           | <i>Sc. acanthopterus</i> | <i>P. rabaudi</i>  | 12    |
|           | <i>Sc. acanthopterus</i> | <i>S. sinensis</i> | 11    |
|           | -                        | <i>L. capito</i>   | 5345  |
| coexpress | -                        | <i>P. rabaudi</i>  | 4884  |
|           | -                        | <i>S. sinensis</i> | 5305  |

**Supplementary Table 16. Total subgenome percent gene retention values for each subgenome of three focal tetraploid species when aligned to three diploid references.**

|                          | <i>L. capito</i> |       | <i>P. rabaudi</i> |       | <i>S. sinensis</i> |       |
|--------------------------|------------------|-------|-------------------|-------|--------------------|-------|
|                          | subP             | subM  | subP              | subM  | subP               | subM  |
| <i>Danio rerio</i>       | 85.68            | 88.09 | 91.65             | 92.05 | 94.03              | 94.80 |
| <i>O. macrolepis</i>     | 85.80            | 88.57 | 91.26             | 92.29 | 93.27              | 94.85 |
| <i>Sc. acanthopterus</i> | 83.98            | 86.59 | 88.70             | 90.26 | 91.41              | 93.01 |

**Supplementary Table 17. Detail information of tandem repeat genes of *S. sinensis*, *L. capito* and *P. rabaudi*.**

|                           | <i>S. sinensis</i> |      | <i>L. capito</i> |      | <i>P. rabaudi</i> |      |
|---------------------------|--------------------|------|------------------|------|-------------------|------|
|                           | subP               | subM | subP             | subM | subP              | subM |
| Total arrays              | 1992               | 2155 | 1803             | 1915 | 1800              | 1826 |
| Total Genes               | 5268               | 6042 | 4579             | 5283 | 4564              | 4929 |
| Average array size        | 2.64               | 2.8  | 2.54             | 2.76 | 2.53              | 2.7  |
| Array sizes larger than 5 | 82                 | 114  | 52               | 94   | 54                | 79   |

**Supplementary Table 18. Chi-squared test (two sides) results for biased genes in each of six tissue types.**

| Tissue | Species            | Expected subP | Observed subP | Expected subM | Observed subM | X2     | df | P-value  |
|--------|--------------------|---------------|---------------|---------------|---------------|--------|----|----------|
| Brain  | <i>S. sinensis</i> | 387.5         | 347           | 387.5         | 428           | 8.4658 | 1  | 0.003619 |
| Brain  | <i>L. capito</i>   | 214           | 192           | 214           | 236           | 4.5234 | 1  | 0.03344  |
| Brain  | <i>P. rabaudi</i>  | 387.5         | 371           | 387.5         | 404           | 1.4052 | 1  | 0.2359   |
| Eye    | <i>S. sinensis</i> | 349.5         | 301           | 349.5         | 398           | 13.461 | 1  | 0.000244 |
| Eye    | <i>L. capito</i>   | 209           | 170           | 209           | 248           | 14.555 | 1  | 0.000136 |
| Eye    | <i>P. rabaudi</i>  | 421           | 381           | 421           | 461           | 7.601  | 1  | 0.005834 |
| Gill   | <i>S. sinensis</i> | 399           | 363           | 399           | 435           | 6.4962 | 1  | 0.01081  |
| Gill   | <i>L. capito</i>   | 338           | 309           | 338           | 367           | 4.9763 | 1  | 0.0257   |
| Gill   | <i>P. rabaudi</i>  | 448           | 412           | 448           | 484           | 5.7857 | 1  | 0.01616  |
| Heart  | <i>S. sinensis</i> | 481.5         | 434           | 481.5         | 529           | 9.3718 | 1  | 0.002204 |
| Heart  | <i>L. capito</i>   | 366           | 322           | 366           | 410           | 10.579 | 1  | 0.001144 |
| Heart  | <i>P. rabaudi</i>  | 538.5         | 445           | 538.5         | 632           | 32.469 | 1  | 1.21E-08 |
| Liver  | <i>S. sinensis</i> | 534.5         | 505           | 534.5         | 564           | 3.2563 | 1  | 0.07115  |
| Liver  | <i>L. capito</i>   | 333.5         | 285           | 333.5         | 382           | 14.106 | 1  | 0.000173 |
| Liver  | <i>P. rabaudi</i>  | 633           | 560           | 633           | 706           | 16.837 | 1  | 4.07E-05 |
| Muscle | <i>S. sinensis</i> | 439           | 378           | 439           | 500           | 16.952 | 1  | 3.83E-05 |
| Muscle | <i>L. capito</i>   | 253.5         | 211           | 253.5         | 296           | 14.25  | 1  | 0.00016  |
| Muscle | <i>P. rabaudi</i>  | 512           | 462           | 512           | 562           | 9.7656 | 1  | 0.001778 |



**Supplementary Table 19. Chi-squared results (two sides) for biased genes in six tissue types which are retained in a 1:1:2:2:2 ratio across subgenomes and the three focal allotetraploids.**

| Tissue | Species            | Expected subP | Observed subP | Expected subM | Observed subM | X2       | df | P-value  |
|--------|--------------------|---------------|---------------|---------------|---------------|----------|----|----------|
| Brain  | <i>S. sinensis</i> | 153.5         | 104           | 153.5         | 203           | 31.925   | 1  | 1.60E-08 |
| Brain  | <i>L. capito</i>   | 92.5          | 95            | 92.5          | 90            | 0.13514  | 1  | 0.7132   |
| Brain  | <i>P. rabaudi</i>  | 187           | 179           | 187           | 195           | 0.68449  | 1  | 0.408    |
| Eye    | <i>S. sinensis</i> | 133           | 92            | 133           | 174           | 25.278   | 1  | 4.96E-07 |
| Eye    | <i>L. capito</i>   | 106.5         | 88            | 106.5         | 125           | 6.4272   | 1  | 0.01124  |
| Eye    | <i>P. rabaudi</i>  | 190.5         | 168           | 190.5         | 213           | 5.315    | 1  | 0.02114  |
| Gill   | <i>S. sinensis</i> | 157           | 127           | 157           | 187           | 11.465   | 1  | 0.000709 |
| Gill   | <i>L. capito</i>   | 174.5         | 176           | 174.5         | 173           | 0.025788 | 1  | 0.8724   |
| Gill   | <i>P. rabaudi</i>  | 448           | 412           | 448           | 484           | 2.0973   | 1  | 0.1476   |
| Heart  | <i>S. sinensis</i> | 197           | 154           | 197           | 240           | 18.772   | 1  | 1.47E-05 |
| Heart  | <i>L. capito</i>   | 201           | 183           | 201           | 219           | 3.2239   | 1  | 0.07257  |
| Heart  | <i>P. rabaudi</i>  | 538.5         | 445           | 538.5         | 632           | 14.824   | 1  | 0.000118 |
| Liver  | <i>S. sinensis</i> | 223.5         | 200           | 223.5         | 247           | 4.9418   | 1  | 0.02621  |
| Liver  | <i>L. capito</i>   | 196.5         | 165           | 196.5         | 228           | 10.099   | 1  | 0.001483 |
| Liver  | <i>P. rabaudi</i>  | 300           | 260           | 300           | 340           | 10.667   | 1  | 0.001091 |
| Muscle | <i>S. sinensis</i> | 185           | 144           | 185           | 226           | 18.173   | 1  | 2.02E-05 |
| Muscle | <i>L. capito</i>   | 146           | 118           | 146           | 174           | 10.74    | 1  | 0.001049 |
| Muscle | <i>P. rabaudi</i>  | 242.5         | 231           | 242.5         | 254           | 1.0907   | 1  | 0.2963   |

**Supplementary Table 20. Constraint on CNSs located on the subP and subM of each species relative to a model that incorporates mean CNS conservation across all subgenomes and subgenome-specific phylogenetic distance from *O. macrolepis*.** Positive values indicate greater constraint than expected, negative values less constraint than expected, and 1SD error bars are derived from the variance in constraint across the subgenome.

| Species                 | Constraint on CNSs<br>relative to a neutral<br>model | 1SD        |
|-------------------------|------------------------------------------------------|------------|
| <i>P. rabaudi</i> subP  | 0.0044259                                            | 0.00634195 |
| <i>P. rabaudi</i> subM  | -0.0020742                                           | 0.00357983 |
| <i>S. sinensis</i> subP | 0.0089924                                            | 0.00626237 |
| <i>S. sinensis</i> subM | -0.0048886                                           | 0.00276531 |
| <i>L. capito</i> subP   | -0.0048327                                           | 0.00329996 |
| <i>L. capito</i> subM   | 0.00215342                                           | 0.00594526 |
| Glodfish subP           | -0.0024434                                           | 0.01028964 |
| Glodfish subM           | 0.00051385                                           | 0.00609393 |
| Common carp subP        | 0.000097932                                          | 0.00959718 |
| Common carp subM        | -0.0017146                                           | 0.0073686  |

**Supplementary Table 21. Non-clonal read pair alignment rate and non-conversion rate of the two diploid and three tetraploid fish species**

| Sample | Non-clonal read pair alignment (%) | Non-conversion rate (%) |
|--------|------------------------------------|-------------------------|
| LuC1   | 49.87                              | 0.22                    |
| LuC2   | 47.54                              | 0.23                    |
| LuC3   | 47.44                              | 0.21                    |
| LuC4   | 47.72                              | 0.23                    |
| LuC5   | 48.16                              | 0.22                    |
| PrR1   | 50.05                              | 0.23                    |
| PrR2   | 50.64                              | 0.22                    |
| PrR3   | 51.83                              | 0.22                    |
| PrR4   | 52.63                              | 0.22                    |
| PrR5   | 49.81                              | 0.22                    |
| SpS1   | 44.35                              | 0.23                    |
| SpS2   | 44.65                              | 0.23                    |
| SpS3   | 45.13                              | 0.23                    |
| SpS4   | 44.51                              | 0.23                    |
| SpS5   | 43.7                               | 0.22                    |
| OnM1   | 55.05                              | 0.24                    |
| OnM2   | 56.98                              | 0.24                    |
| OnM3   | 49.99                              | 0.29                    |
| OnM4   | 52.58                              | 0.34                    |
| OnM5   | 51.81                              | 0.30                    |
| ScA1   | 60.35                              | 0.23                    |
| ScA2   | 57.01                              | 0.23                    |
| ScA3   | 58.86                              | 0.24                    |
| ScA4   | 57.45                              | 0.24                    |
| ScA5   | 56.81                              | 0.24                    |

Abbreviation of species name: Luc, *L. capito* ;  
PrR, *P. rabaudi* ; SpS, *S. sinensis* ; OnM, *O. macrolepis* ; ScA, *Sc. acanthopterus* .

**Supplementary Table 22. TAD and conserved TAD identified by hicFINDTAD and HiTAD.**

|                     | <i>S. sinensis</i> | <i>P. rabaudi</i> | <i>L. capito</i> |
|---------------------|--------------------|-------------------|------------------|
| TAD (hicFINDTAD)    |                    |                   |                  |
| SubP_TAD_number     | 1,333              | 1,574             | 1,714            |
| SubM_TAD_number     | 1,449              | 1,663             | 1,669            |
| SubP conserved TAD  | 1,102              | 1,282             | 1,297            |
| SubgM conserved TAD | 1,119              | 1,244             | 1,332            |
| TAD (HiTAD)         |                    |                   |                  |
| SubP_TAD_number     | 1,345              | 1,292             | 1,443            |
| SubM_TAD_number     | 1,493              | 1,328             | 1,477            |
| SubP conserved TAD  | 1,073              | 1,044             | 1,069            |
| SubM conserved TAD  | 1,106              | 1,059             | 1,073            |

**Supplementary Table 23. Change in size of TADs found in subgenomes of three allotetraploids.**

|                   | <i>S. sinensis</i><br>subP | <i>S. sinensis</i><br>subM | <i>P. rabaudi</i><br>subP | <i>P. rabaudi</i><br>subM | <i>L. capito</i><br>subP | <i>L. capito</i><br>subM |
|-------------------|----------------------------|----------------------------|---------------------------|---------------------------|--------------------------|--------------------------|
| Maximum size (bp) | 3160000                    | 3320000                    | 2120000                   | 5240000                   | 2280000                  | 3200000                  |
| Minimum size (bp) | 120000                     | 160000                     | 120000                    | 80000                     | 120000                   | 120000                   |
| Average size (bp) | 578665                     | 594092                     | 471258                    | 466723                    | 473162                   | 482109                   |

**Supplementary Table 24. Mitochondrial and assembly genomes of reported species used in this study.**

| Species                              | Type          | Source   | Access number or downloadable website                                                 |
|--------------------------------------|---------------|----------|---------------------------------------------------------------------------------------|
| <i>Anabarrilius grahami</i>          | Mitochondrial | NCBI     | MF370204.1                                                                            |
|                                      | Genome        | NCBI     | GCA_003731715.1                                                                       |
| <i>Ancherythroculter nigrocaudat</i> | Mitochondrial | NCBI     | MT588183.1                                                                            |
|                                      | Genome        | NGDC     | GWHAAZV00000000                                                                       |
| <i>Carassius auratus</i>             | Mitochondrial | NCBI     | NC 002079.1                                                                           |
|                                      | Genome        | NCBI     | GCA_014332655.1<br>GCA_019720715.2                                                    |
| <i>Ctenopharyngodon idella</i>       | Mitochondrial | NCBI     | NC 010288.1                                                                           |
|                                      | Genome        | NCGR     | <a href="http://www.ncgr.ac.cn/grasscarp/">http://www.ncgr.ac.cn/grasscarp/</a>       |
| <i>Cyprinus carpio</i>               | Mitochondrial | NCBI     | NC 001606.1                                                                           |
|                                      | Genome        | NCBI     | GCA_018340385.1                                                                       |
| <i>Danio rerio</i>                   | Mitochondrial | NCBI     | NC 002333.2                                                                           |
|                                      | Genome        | NCBI     | GCA_020184715.1                                                                       |
| <i>Danionella translucida</i>        | Mitochondrial | GenBase  | C_AA001640.1                                                                          |
|                                      | Genome        | NCBI     | GCA_007224835.1                                                                       |
| <i>Hypophthalmichthys molitrix</i>   | Mitochondrial | NCBI     | NC 010156.1                                                                           |
|                                      | Genome        | figshare | 12618884                                                                              |
| <i>Hypophthalmichthys nobilis</i>    | Mitochondrial | NCBI     | NC 010194.1                                                                           |
|                                      | Genome        | CNSA     | CNA0019189                                                                            |
| <i>Megalobrama amblycephala</i>      | Mitochondrial | NCBI     | NC 010341.1                                                                           |
|                                      | Genome        | GigaDB   | 100305                                                                                |
| <i>Onychostoma macrolepis</i>        | Mitochondrial | NCBI     | NC 023799.1                                                                           |
|                                      | Genome        | NCBI     | GCA_012432095.1                                                                       |
| <i>Paracanthobrama guichenoti</i>    | Mitochondrial | NCBI     | NC 024430.1                                                                           |
|                                      | Genome        | NCBI     | GCA_018749465.1                                                                       |
| <i>Pimephales promelas</i>           | Mitochondrial | NCBI     | NC 028087.1                                                                           |
|                                      | Genome        | NCBI     | GCA_016745375.1                                                                       |
| <i>Poropuntius huangchuchieni</i>    | Mitochondrial | NCBI     | MN723896.1                                                                            |
|                                      | Genome        | Dryad    | <a href="https://www.dryad.org/doi/10.21203/data.dryad.crjdfn32p">dryad.crjdfn32p</a> |
| <i>Puntius tetrazona</i>             | Mitochondrial | NCBI     | EU287909.1                                                                            |
|                                      | Genome        | NCBI     | GCA_018831695.1                                                                       |
| <i>Triplophysa bleekeri</i>          | Mitochondrial | NCBI     | NC 018774.1                                                                           |
|                                      | Genome        | GigaDB   | 100823                                                                                |

For *Carassius auratus*, the genome version (GCA\_019720715.2) was only used for CNSs analysis, and we used another genome version (GCA\_014332655.1) for all other analyses.
