# Supplementary material for: Maternal dominance contributes to subgenome differentiation in allopolyploid fishes
Source: PubMed Central journal article supplement (PMC10724154; doi:10.1038/s41467-023-43740-y), 2023-12-15
Supplement: 41467_2023_43740_MOESM3_ESM.pdf [file 41467_2023_43740_MOESM3_ESM.pdf]

## **Description of Additional Supplementary Files**

### **Supplementary Data 1**

Description: Evaluation of the accuracy of the assembled genomes using Illumina pair-end reads.

### **Supplementary Data 2**

Description: Characteristics of genes identified in the assembled genomes.

### **Supplementary Data 3**

Description: Detail information of TEs identified in the assembled genomes.

### **Supplementary Data 4**

Description: Hox genes identified in subgenomes of three allotetraploids.

### **Supplementary Data 5**

Description: Occupied genome length, gene number and TE sequences in A/B compartment in subgenomes of three allotetraploids.

### **Supplementary data 6**

Description: Tissues of studied species used for RNA-Seq and Iso-Seq. Supplementary Data 7.  
Hyperlinks for all data generated in this study.
