# Supplementary material for: Maternal dominance contributes to subgenome differentiation in allopolyploid fishes
Source: PubMed Central journal article supplement (PMC10724154; doi:10.1038/s41467-023-43740-y), 2023-12-15
Supplement: 41467_2023_43740_MOESM10_ESM.pdf [file 41467_2023_43740_MOESM10_ESM.pdf]

To view the full contents of this document, you need a later version of the PDF viewer. You can upgrade to the latest version of Adobe Reader from [www.adobe.com/products/acrobat/readstep2.html](http://www.adobe.com/products/acrobat/readstep2.html)

For further support, go to [www.adobe.com/support/products/acrreader.html](http://www.adobe.com/support/products/acrreader.html)
